# Supplementary material for: Antiprotozoal Nor-Triterpene Alkaloids from Buxus sempervirens L
Source: MDPI journal article supplement (doi:10.3390/antibiotics10060696), 2021-06-10
Supplement: s1 [file s1]

## Article

# Antiprotozoal Nor-Triterpene Alkaloids from *Buxus sempervirens* L.

Lara U. Szabó <sup>1</sup>, Marcel Kaiser <sup>2,3</sup>, Pascal Mäser <sup>2,3</sup> and Thomas J. Schmidt <sup>1,\*</sup>

<sup>1</sup> Institute of Pharmaceutical Biology and Phytochemistry (IPBP), University of Münster, Pharma Campus Corrensstraße 48, D-48149 Münster, Germany; lszabo@uni-muenster.de

<sup>2</sup> Swiss Tropical and Public Health Institute (Swiss TPH), Socinstrasse 57, CH-4051 Basel, Switzerland; marcel.kaiser@unibas.ch (M.K.); pascal.maeser@swisstph.ch (P.M.)

<sup>3</sup> University of Basel, Petersplatz 1, CH-4003 Basel, Switzerland

\* Correspondence: thomschm@uni-muenster.de; Tel.: +49-251-83-33378

**Citation:** Szabó, L.U.; Kaiser, M.; Mäser, P.; Schmidt, T.J. Antiprotozoal Nor-Triterpene Alkaloids from *Buxus sempervirens* L. *Antibiotics* **2021**, *10*, x. <https://doi.org/10.3390/xxxxx>

Received: 19 May 2021

Accepted: 8 June 2021

Published:

**Publisher's Note:** MDPI stays neutral with regard to jurisdictional claims in published maps and institutional affiliations.

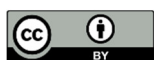

**Copyright:** © 2021 by the authors. Licensee MDPI, Basel, Switzerland. This article is an open access article distributed under the terms and conditions of the Creative Commons Attribution (CC BY) license (<http://creativecommons.org/licenses/by/4.0/>).

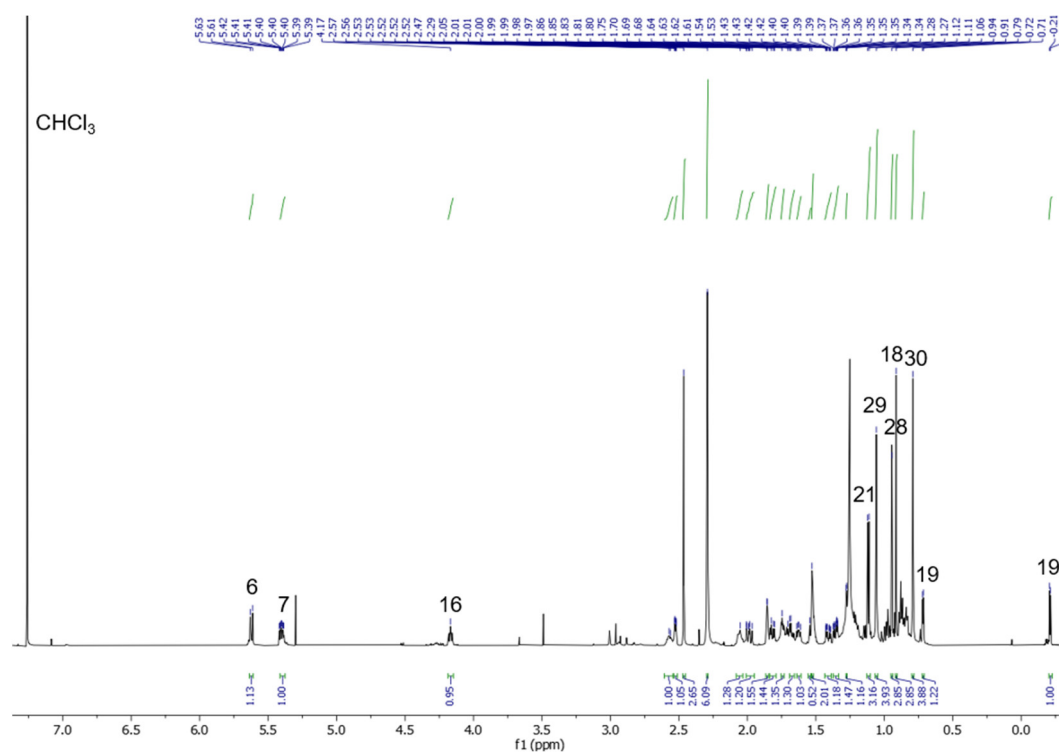

**Figure S1.**  $^1\text{H}$  NMR spectrum of Cyclovirobuxine-B (**2**) ( $\text{CDCl}_3$ , 600 MHz). The assignment of the signals between 1.275 and 2.6 ppm can be found in the enlarged Figure S2.

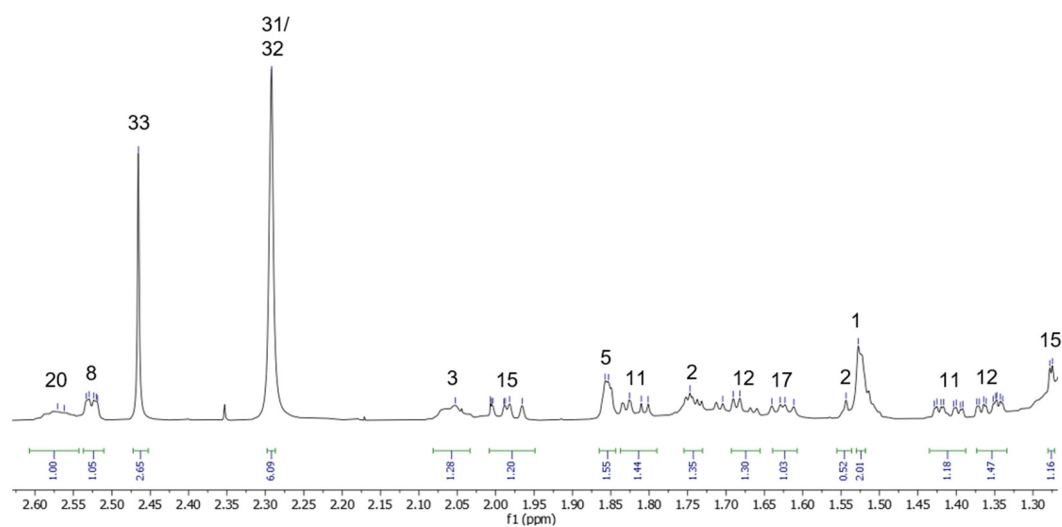

**Figure S2.** Detail of the  $^1\text{H}$  NMR spectrum of Cyclovirobuxine-B (**2**) ( $\text{CDCl}_3$ , 600 MHz).

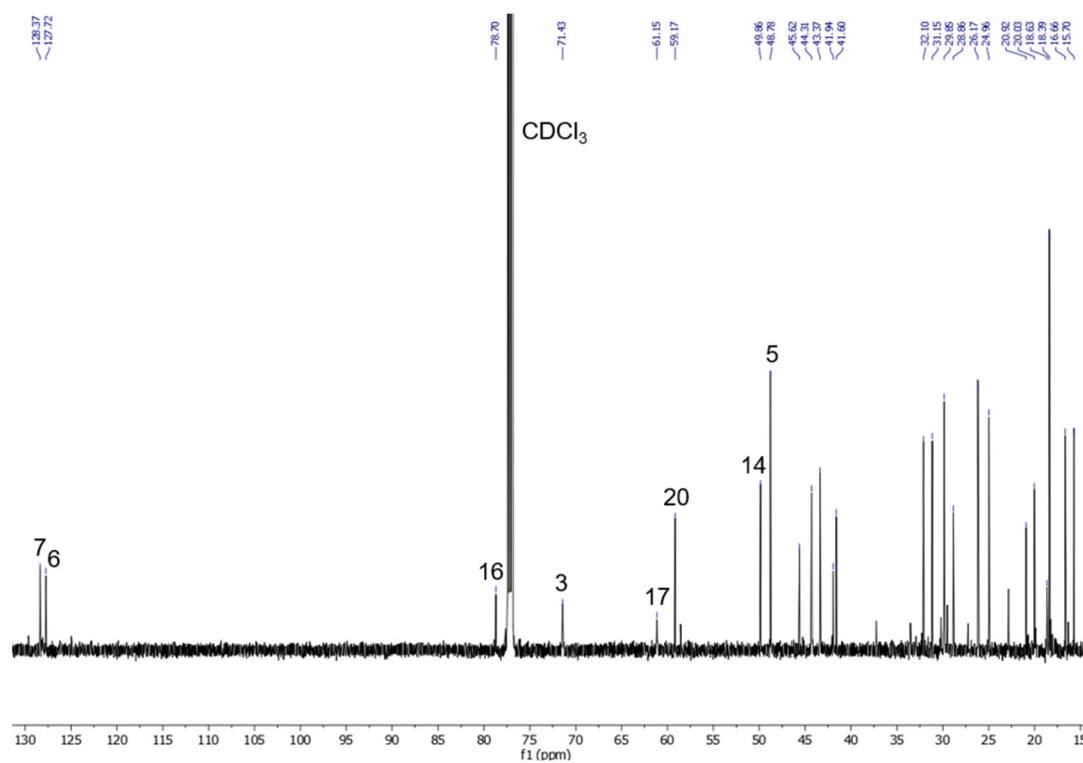

**Figure S3.**  $^{13}\text{C}$  NMR spectrum of Cyclovirobuxine-B (**2**) ( $\text{CDCl}_3$ , 150 MHz). The assignment of the signals between 15 and 46 ppm can be found in the enlarged Figure S4.

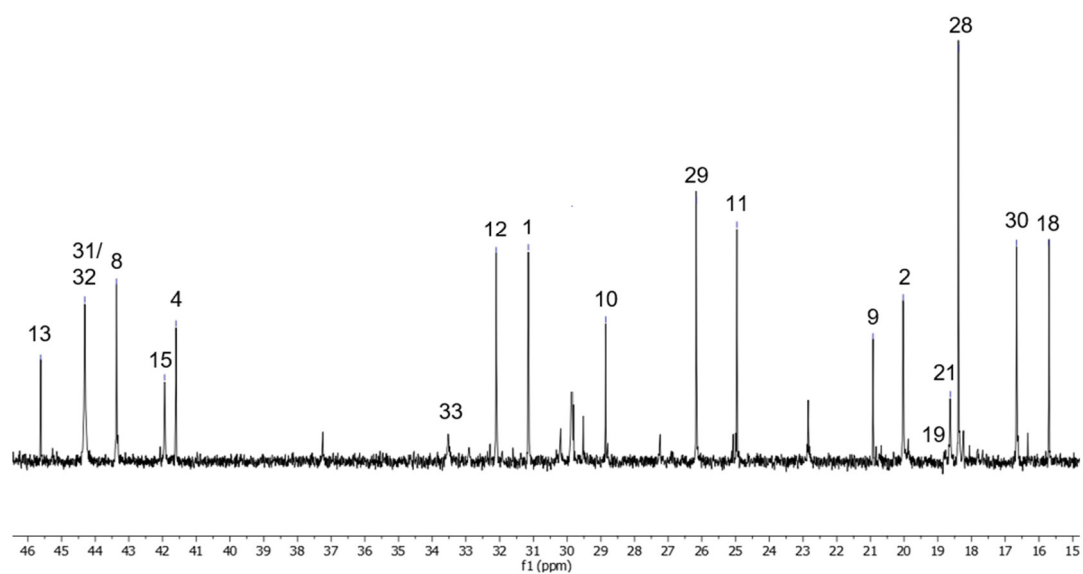

**Figure S4.** Detail of the  $^{13}\text{C}$  NMR spectrum of Cyclovirobuxine-B (**2**) ( $\text{CDCl}_3$ , 150 MHz).

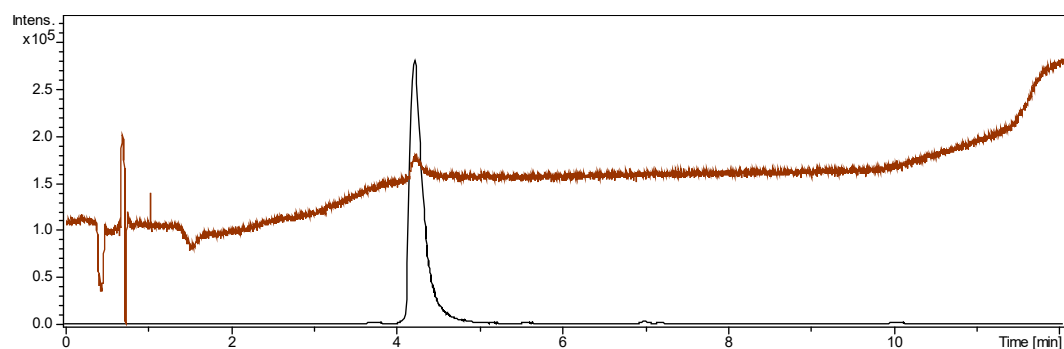

**Figure S5.** UHPLC/ESI-QqTOF-MS/MS chromatogram of O-tigloylcyclomicrophylline-B (3). Base peak chromatogram 200.0000-1000.0000 +All MS (black); UV-Chromatogram, 200-400 nm (red).

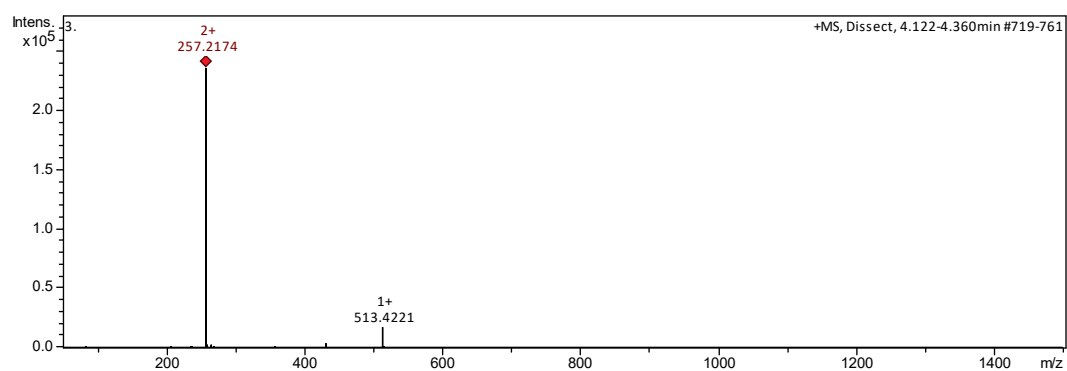

**Figure S6.** +ESI-QqTOF MS spectrum of O-tigloylcyclomicrophylline-B (3);  $m/z$  257.2174  $[M+2H]^{2+}$  and 513.4221  $[M+H]^+$ .

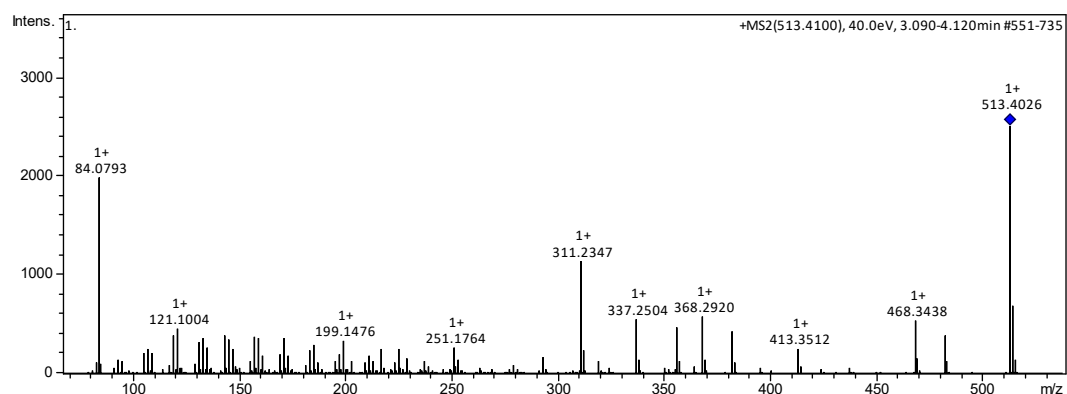

**Figure S7.** +ESI-QqTOF MS/MS spectrum of O-tigloylcyclomicrophylline-B (3).



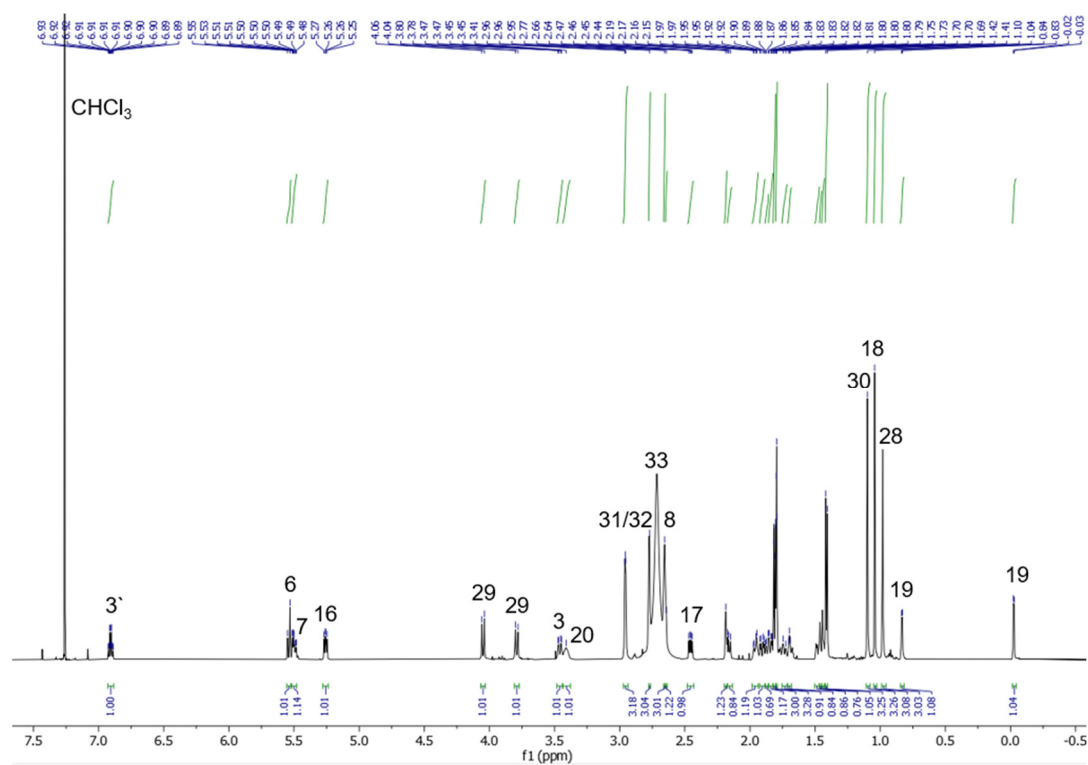

**Figure S8.**  $^1\text{H}$  NMR spectrum of O-tigloylcyclomicrophylline-B (**3**) ( $\text{CDCl}_3$ , 600 MHz). The assignment of the signals between 1.35 and 2.25 ppm can be found in the enlarged Figure S9.

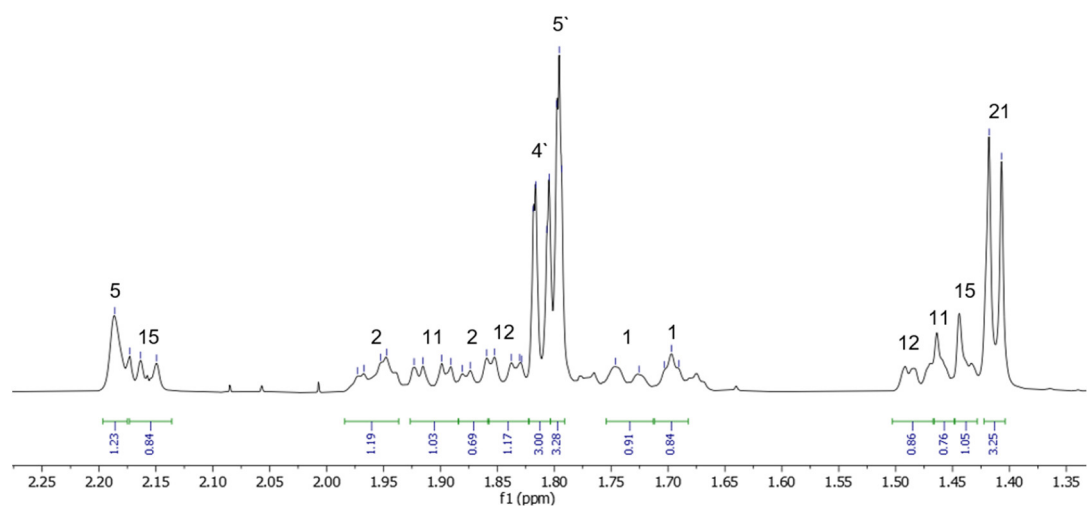

**Figure S9.** Detail of the  $^1\text{H}$  NMR spectrum of O-tigloylcyclomicrophylline-B (**3**) ( $\text{CDCl}_3$ , 600 MHz).

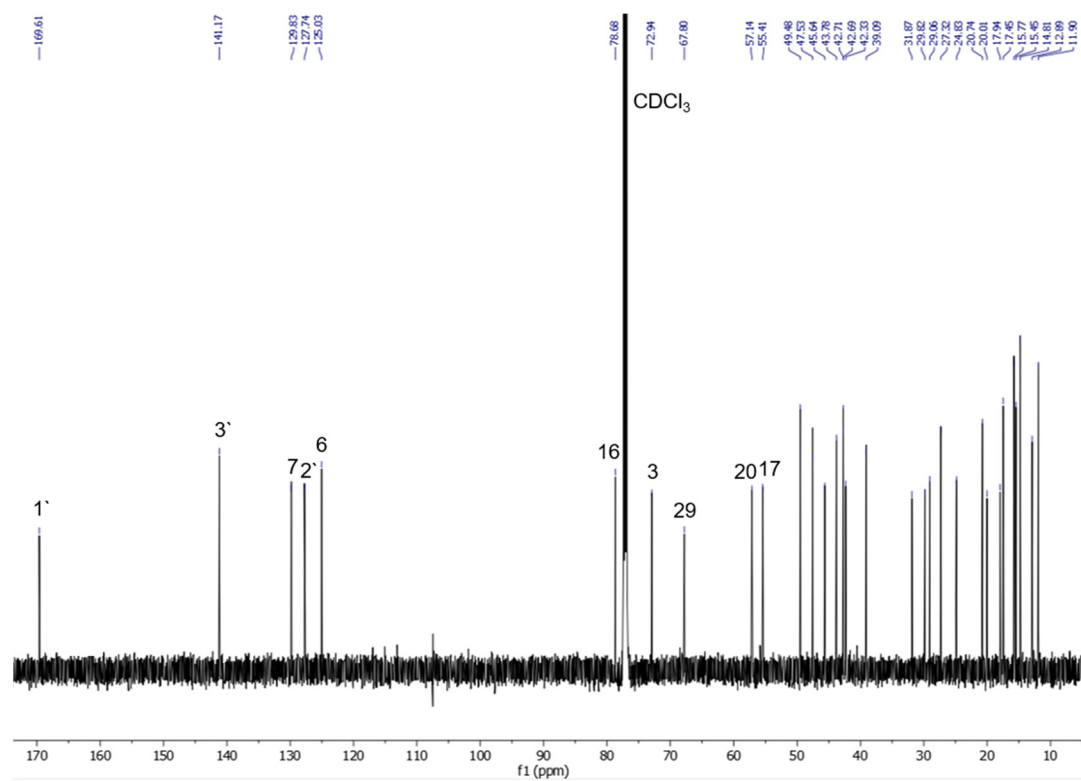

**Figure S10.**  $^{13}\text{C}$  NMR spectrum of O-tigloylcyclomicrophylline-B (3) ( $\text{CDCl}_3$ , 150 MHz). The assignment of the signals between 10 and 50 ppm can be found in the enlarged Figure S11.

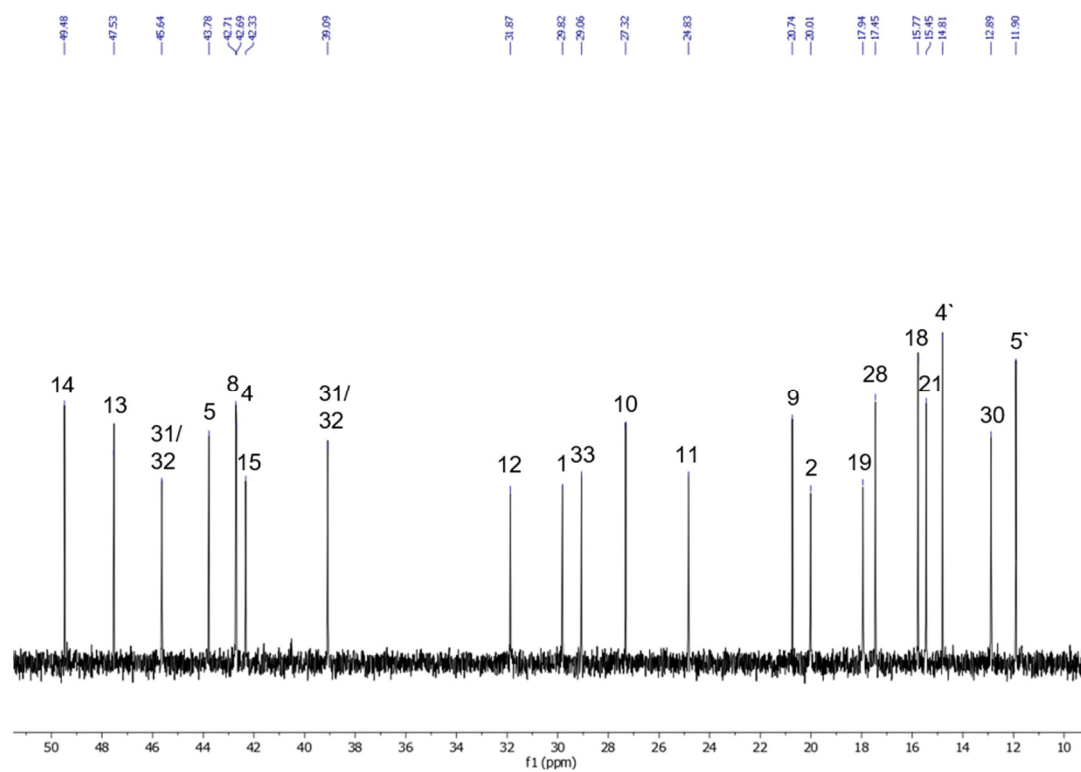

**Figure S11.** Detail of the  $^{13}\text{C}$  NMR spectrum of O-tigloylcyclomicrophylline-B (3) ( $\text{CDCl}_3$ , 150 MHz).

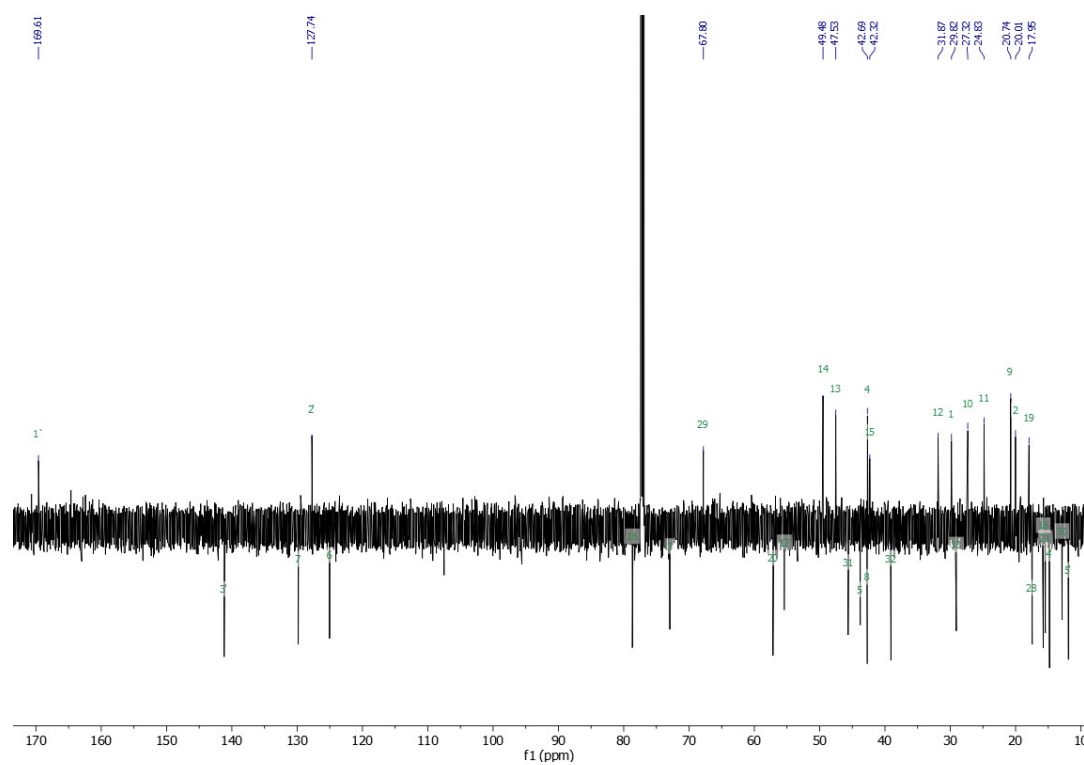

**Figure S12.**  $^{13}\text{C}$  APT spectrum of O-tigloylcyclomicrophylline-B (3) ( $\text{CDCl}_3$ , 150 MHz).

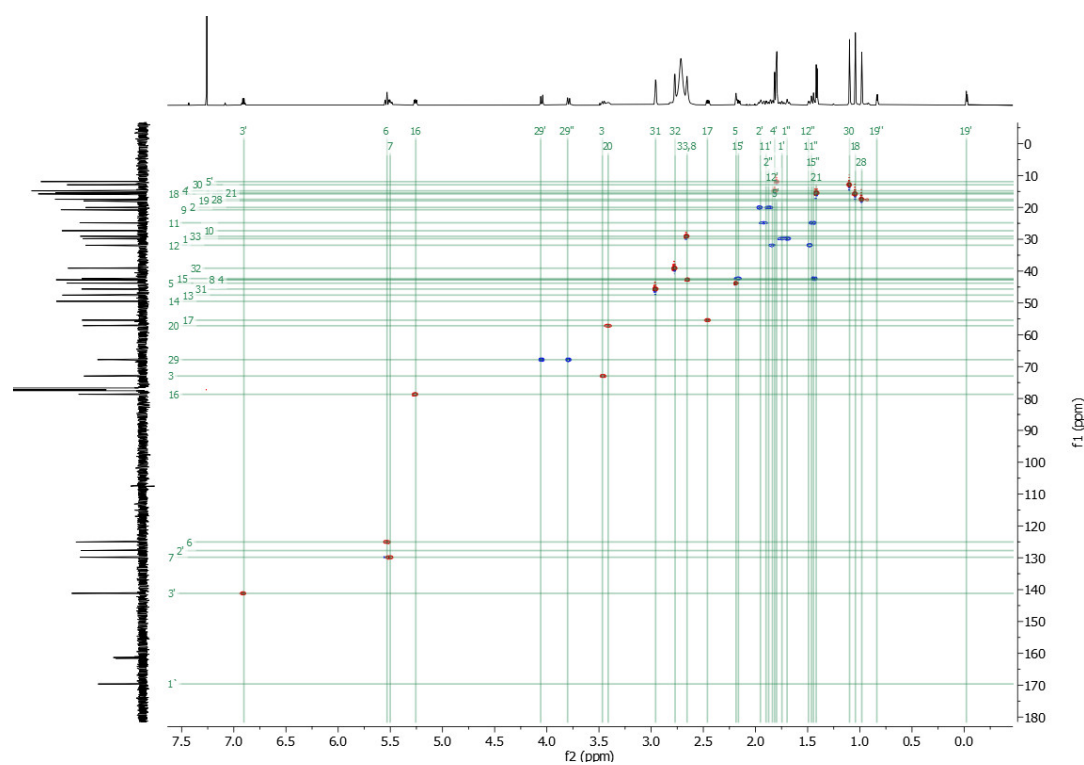

**Figure S13.**  $^1\text{H}/^{13}\text{C}$  HSQC spectrum of O-tigloylcyclomicrophylline-B (3) ( $\text{CDCl}_3$ , 600/150 MHz).

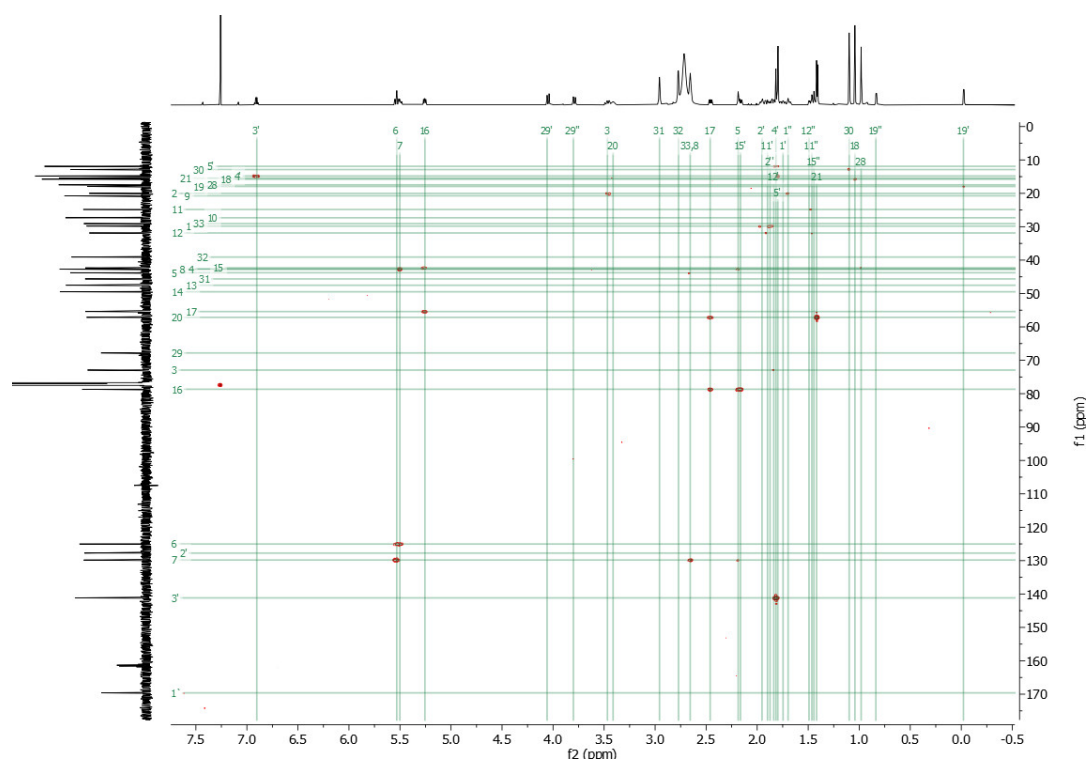

Figure S14.  $^1\text{H}/^{13}\text{C}$  H2BC spectrum of O-tigloylcyclomicrophylline-B (3) ( $\text{CDCl}_3$ , 600/150 MHz).

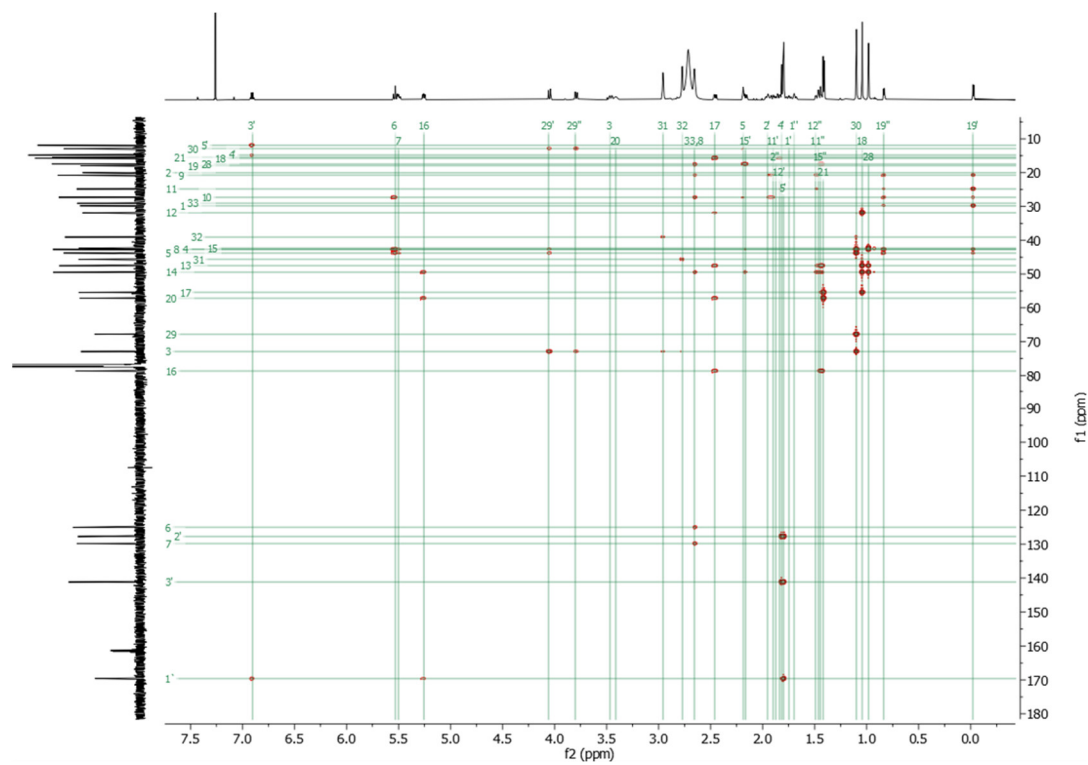

Figure S15.  $^1\text{H}/^{13}\text{C}$  HMBC spectrum of O-tigloylcyclomicrophylline-B (3) ( $\text{CDCl}_3$ , 600/150 MHz).

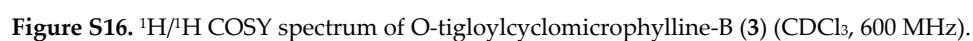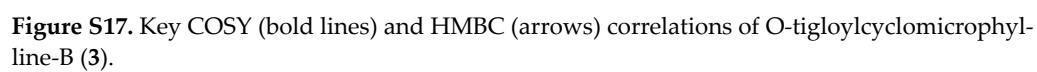

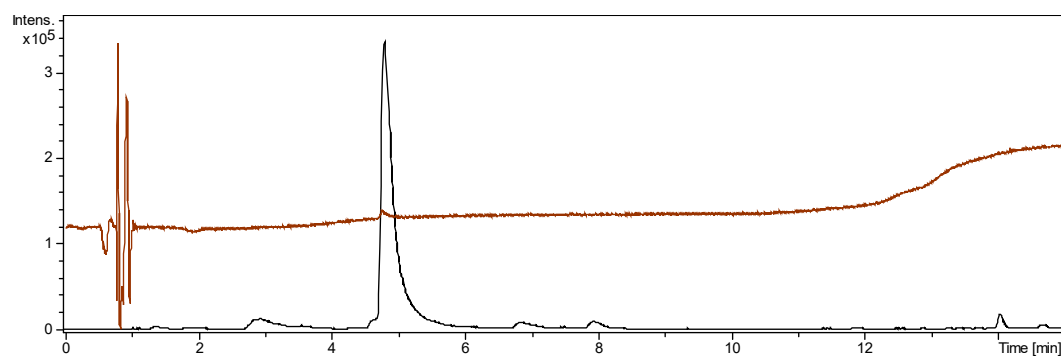

**Figure S18.** UHPLC/ESI-QqTOF-MS/MS chromatogram of O-tigloylcyclomicrophylline-A (**4**). Base peak chromatogram 200.0000-1000.0000 +All MS (black); UV-Chromatogram, 200-400 nm (red).

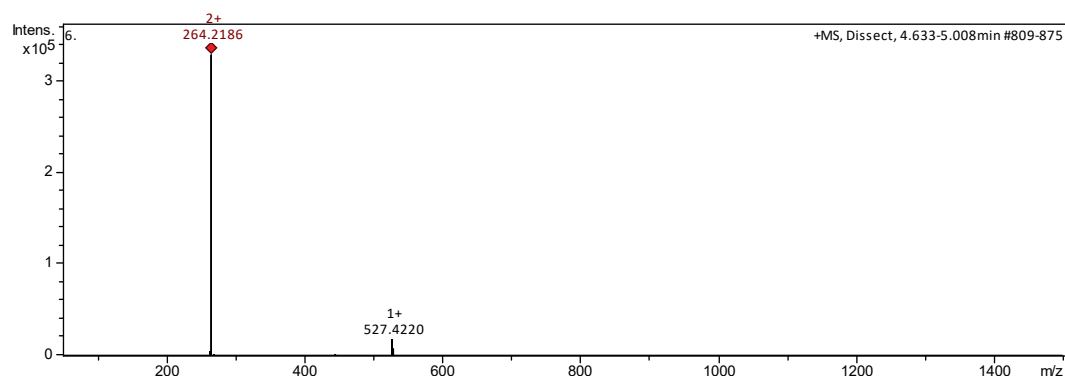

**Figure S19.** +ESI-QqTOF MS spectrum of O-tigloylcyclomicrophylline-A (**4**);  $m/z$  264.2186  $[M+2H]^{2+}$  and 527.4220  $[M+H]^+$ .

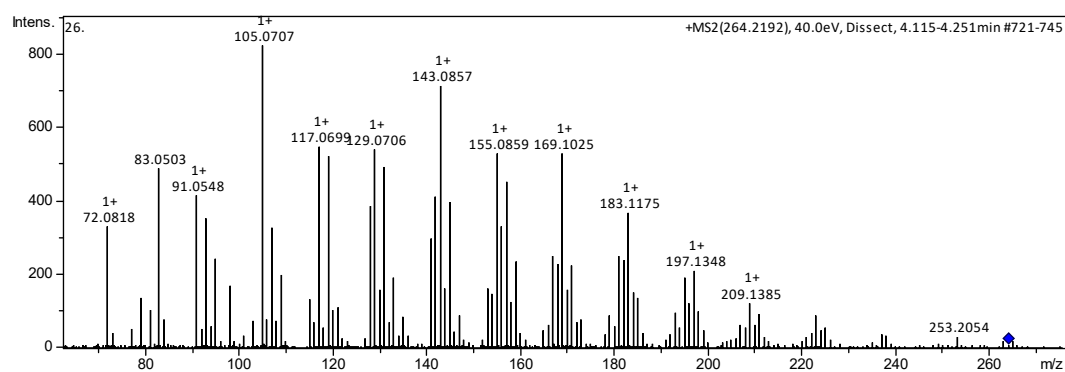

**Figure S20.** +ESI-QqTOF MS/MS spectrum of O-tigloylcyclomicrophylline-A (**4**).

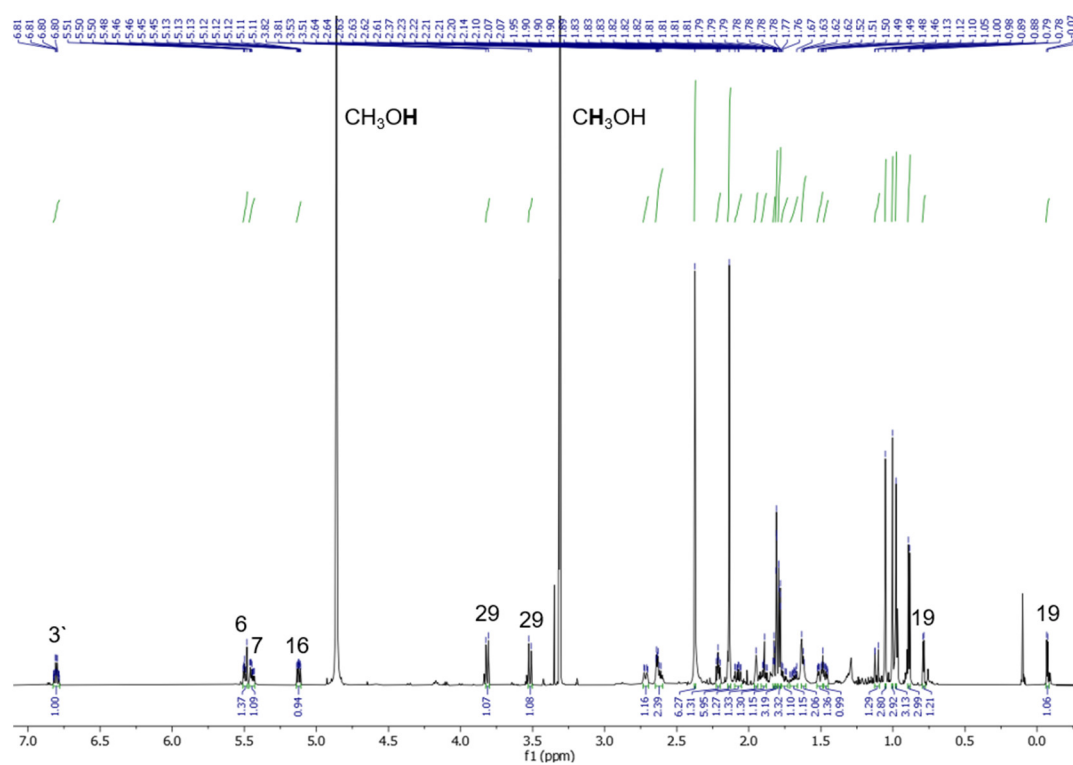

**Figure S21.**  $^1\text{H}$  NMR spectrum of O-tigloylcyclocimicrophylline-A (4) ( $\text{CD}_3\text{OD}$ , 600 MHz). The assignment of the signals between 0.85 and 2.8 ppm can be found in the enlarged Figure S22.

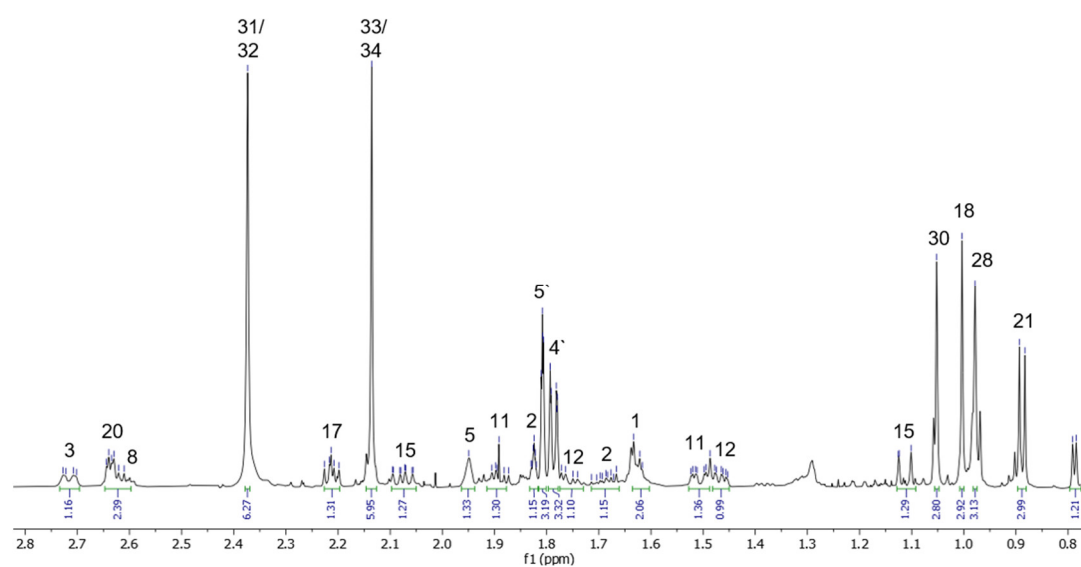

**Figure S22.** Detail of the  $^1\text{H}$  NMR spectrum of O-tigloylcyclocimicrophylline-A (4) ( $\text{CD}_3\text{OD}$ , 600 MHz).

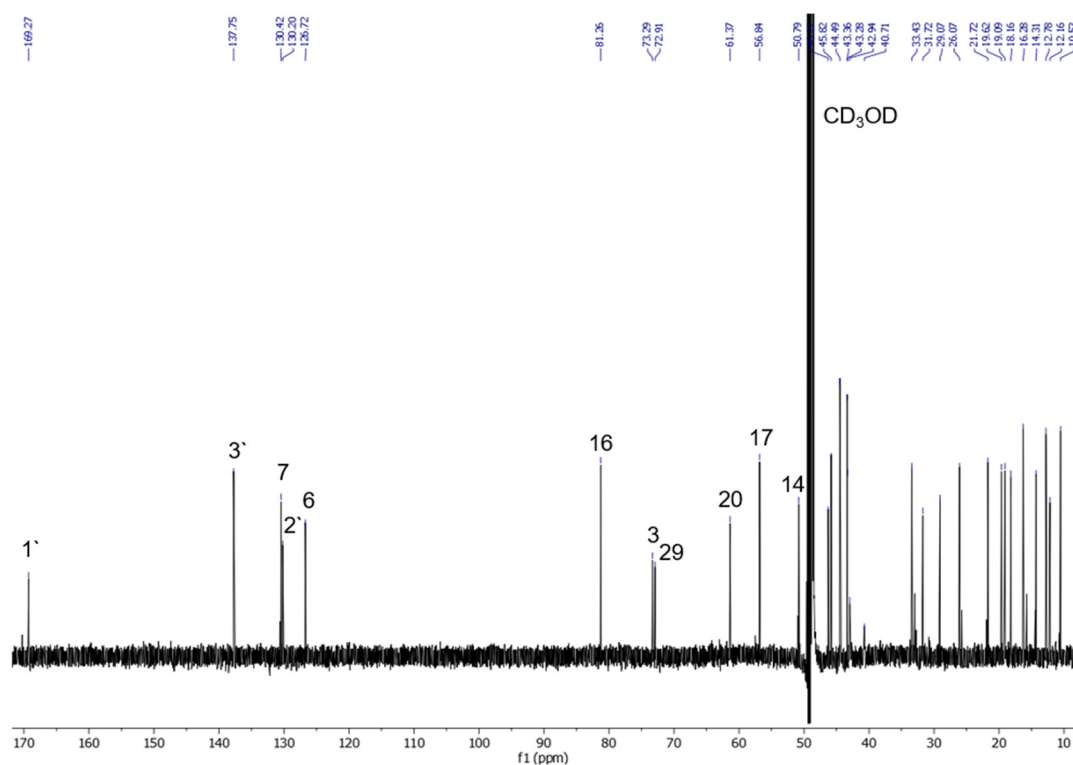

**Figure S23.**  $^{13}\text{C}$  NMR spectrum of O-tigloylcyclomicrophylline-A (4) ( $\text{CD}_3\text{OD}$ , 150 MHz). The assignment of the signals between 10 and 47 ppm can be found in the enlarged Figure S24.

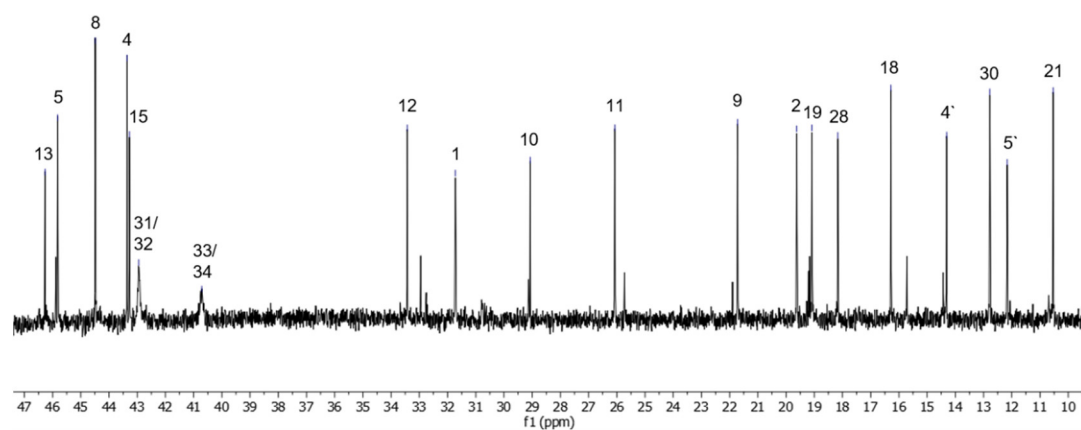

**Figure S24.** Detail of the  $^{13}\text{C}$  NMR spectrum of O-tigloylcyclomicrophylline-A (4) ( $\text{CD}_3\text{OD}$ , 150 MHz).



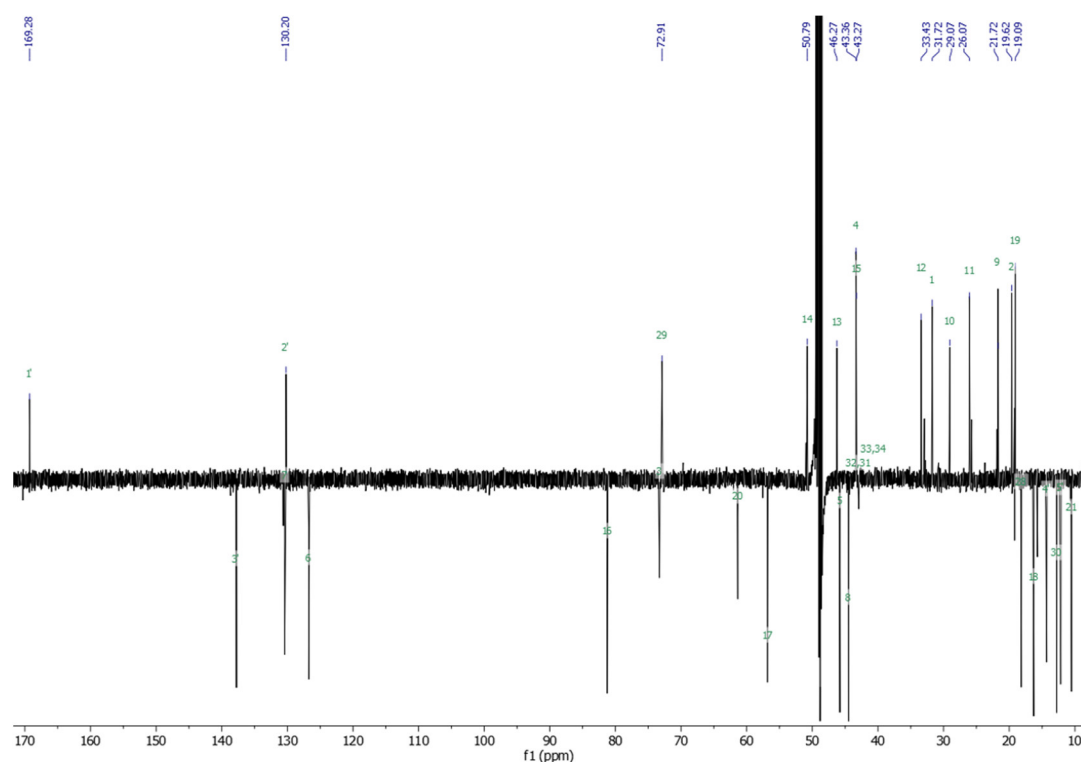

**Figure S25.**  $^{13}\text{C}$  APT spectrum of O-tigloylcyclomicrophylline-A (**4**) ( $\text{CD}_3\text{OD}$ , 150 MHz).

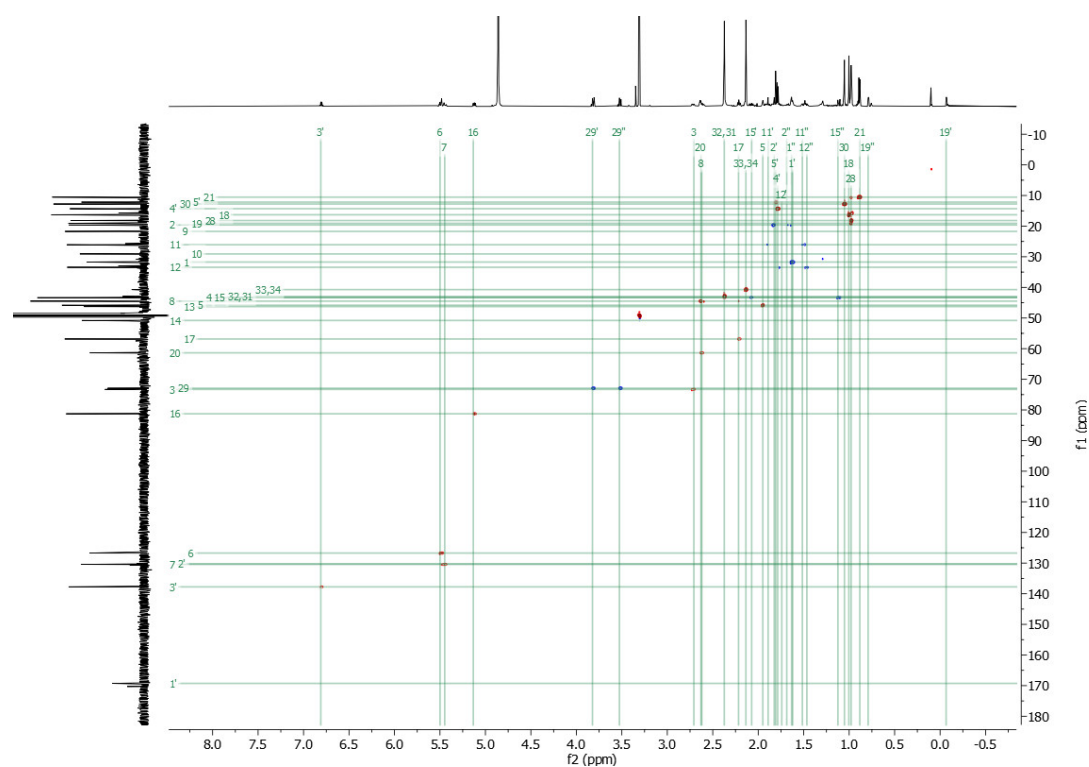

**Figure S26.**  $^1\text{H}/^{13}\text{C}$  HSQC spectrum of O-tigloylcyclomicrophylline-A (**4**) ( $\text{CD}_3\text{OD}$ , 600/150 MHz).

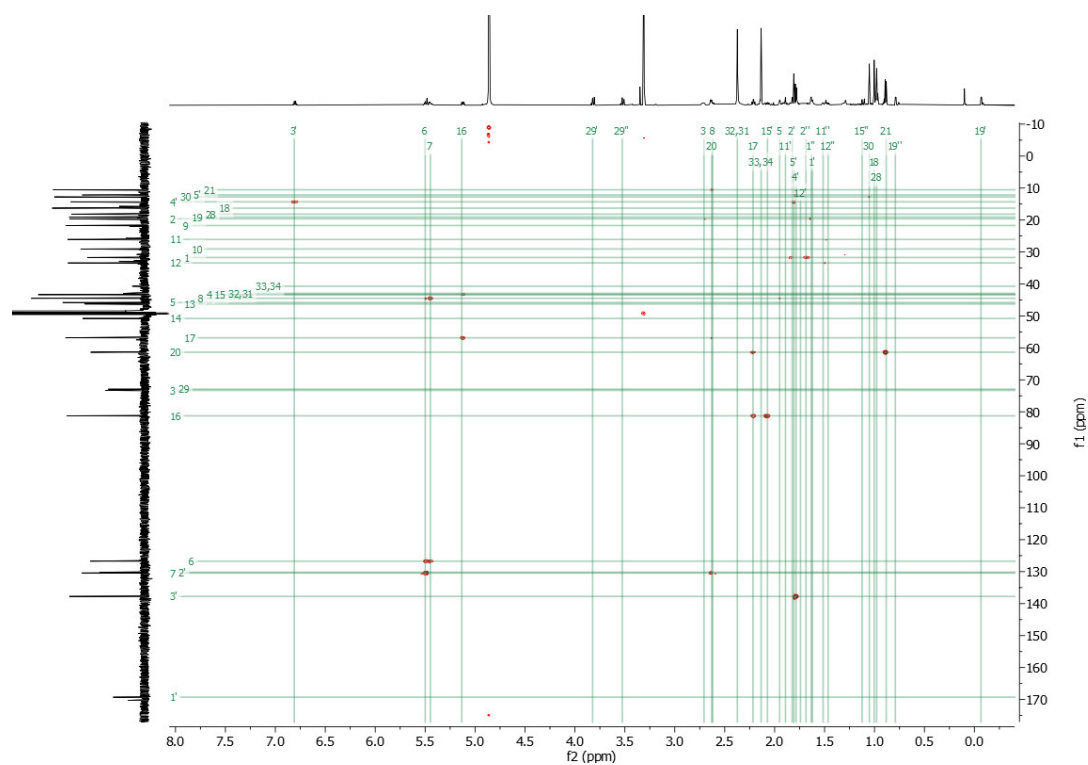

Figure S27.  $^1\text{H}/^{13}\text{C}$  H2BC spectrum of O-tigloylcyclomicrophylline-A (4) ( $\text{CD}_3\text{OD}$ , 600/150 MHz).

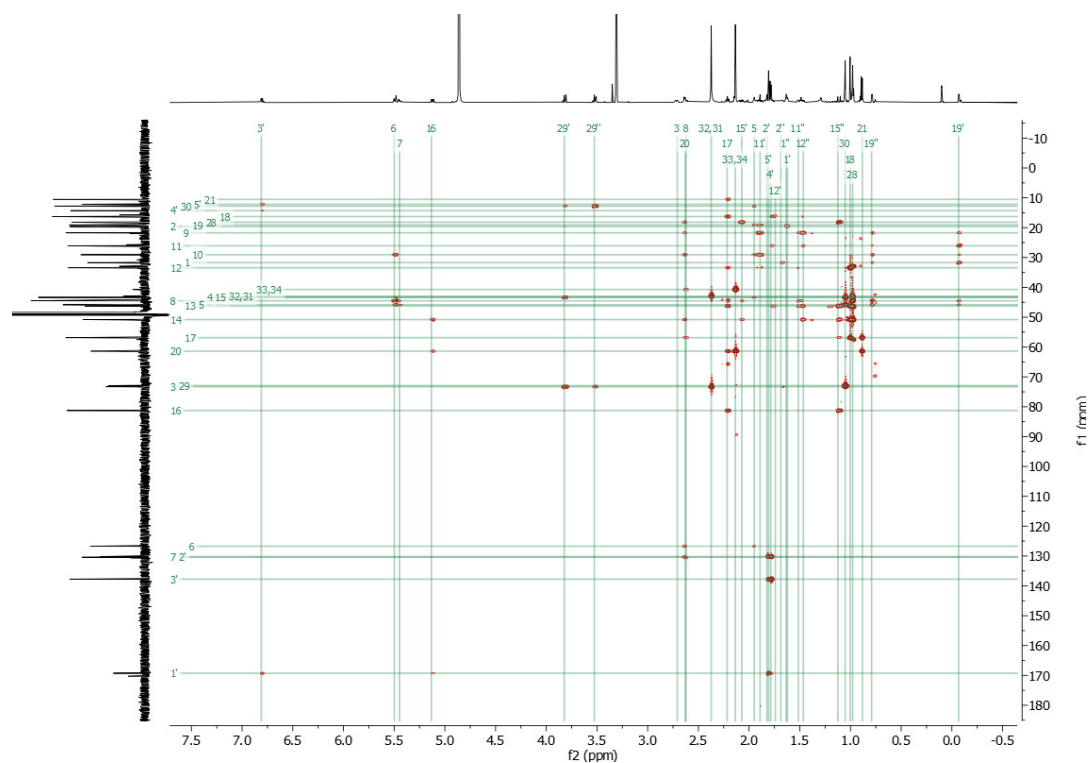

Figure S28.  $^1\text{H}/^{13}\text{C}$  HMBC spectrum of O-tigloylcyclomicrophylline-A (4) ( $\text{CD}_3\text{OD}$ , 600/150 MHz).

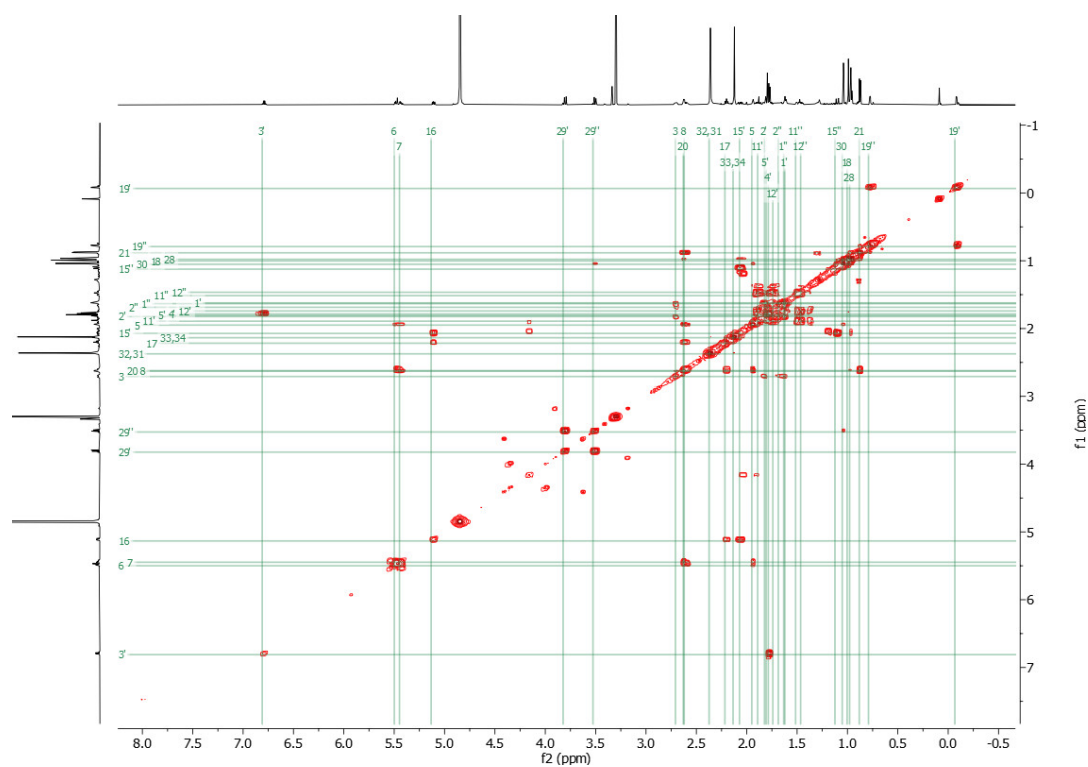

**Figure S29.**  $^1\text{H}/^1\text{H}$  COSY spectrum of O-tigloylcyclomicrophylline-A (**4**) ( $\text{CD}_3\text{OD}$ , 600 MHz).

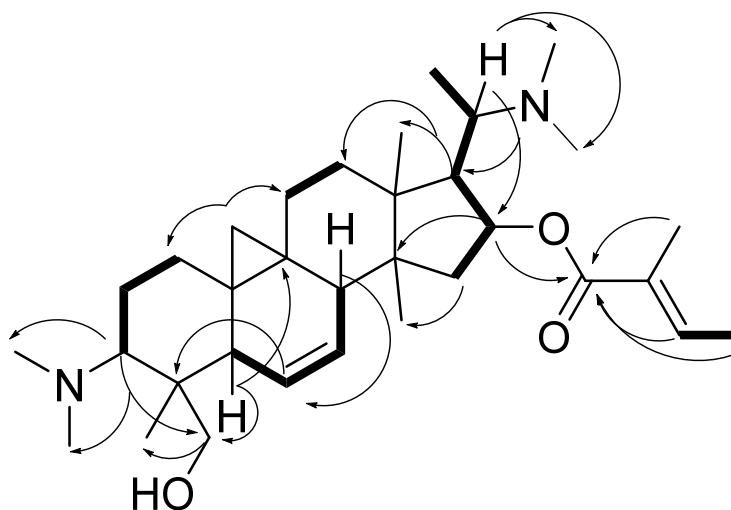

**Figure S30.** Key COSY (bold lines) and HMBC (arrows) correlations of O-tigloylcyclomicrophylline-A (**4**).

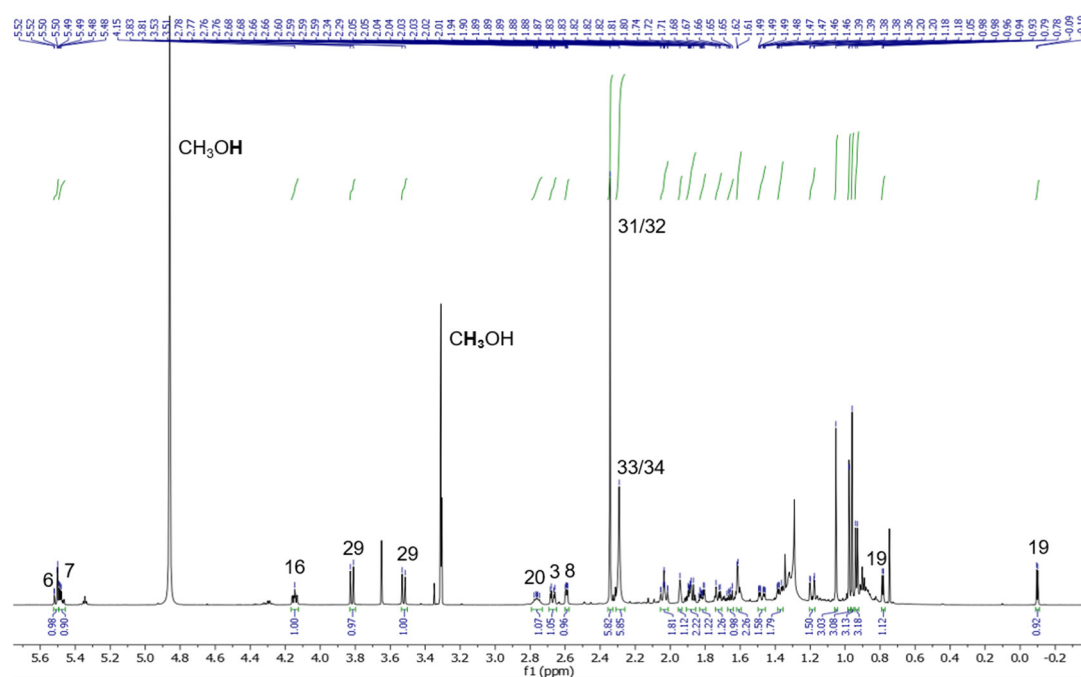

**Figure S31.**  $^1\text{H}$  NMR spectrum of Cyclomicrophylline-A (5) ( $\text{CD}_3\text{OD}$ , 600 MHz). The assignment of the signals between 0.9 and 2.05 ppm can be found in the enlarged Figure S32.

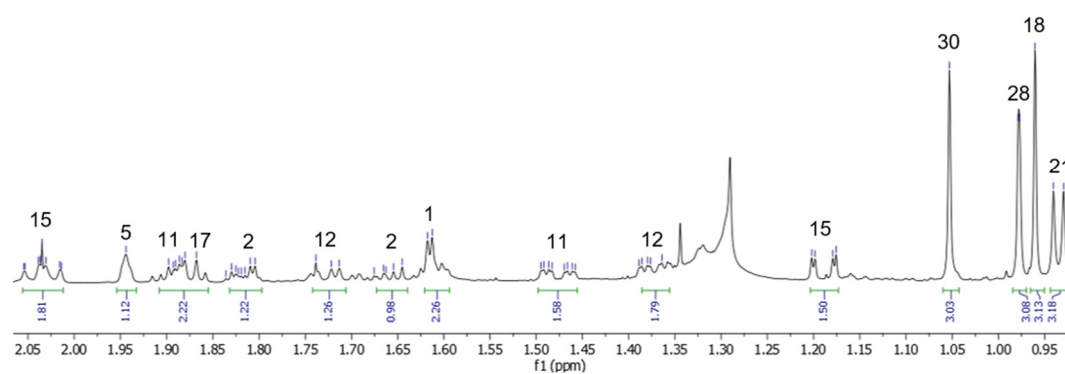

**Figure S32.** Detail of the  $^1\text{H}$  NMR spectrum of Cyclomicrophylline-A (5) ( $\text{CD}_3\text{OD}$ , 600 MHz).

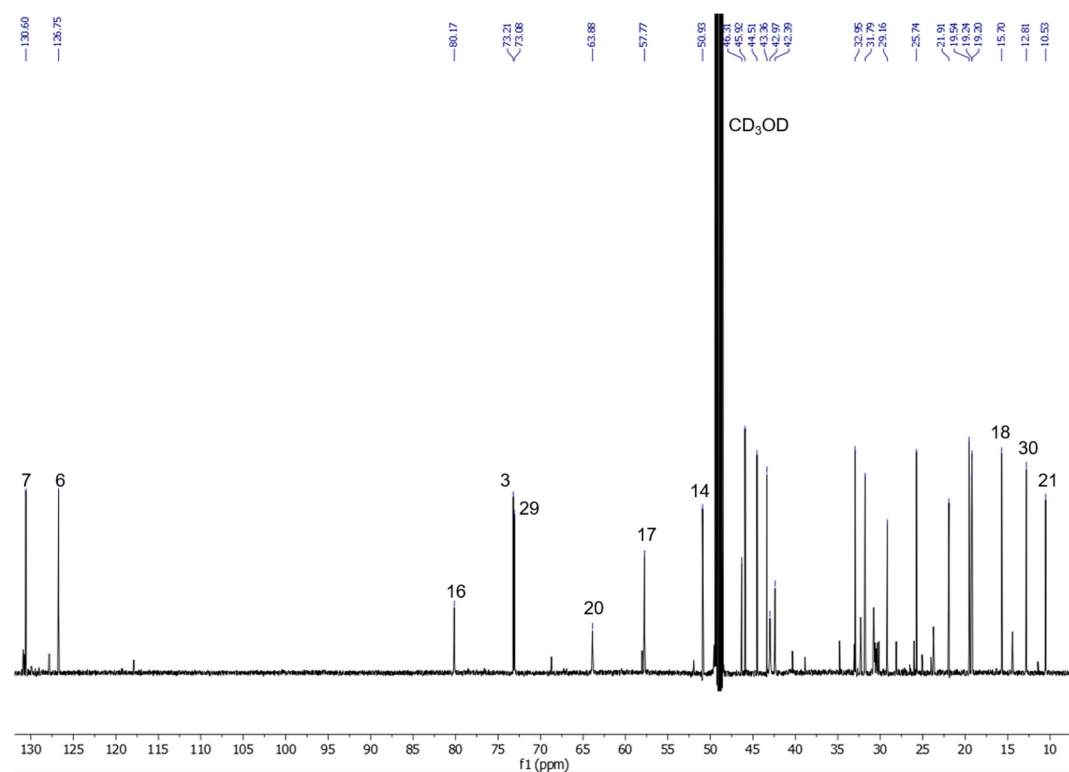

**Figure S33.**  $^{13}\text{C}$  NMR spectrum of Cyclomicrophylline-A (5) ( $\text{CD}_3\text{OD}$ , 150 MHz). The assignment of the signals between 19 and 46.5 ppm can be found in the enlarged Figure S34.

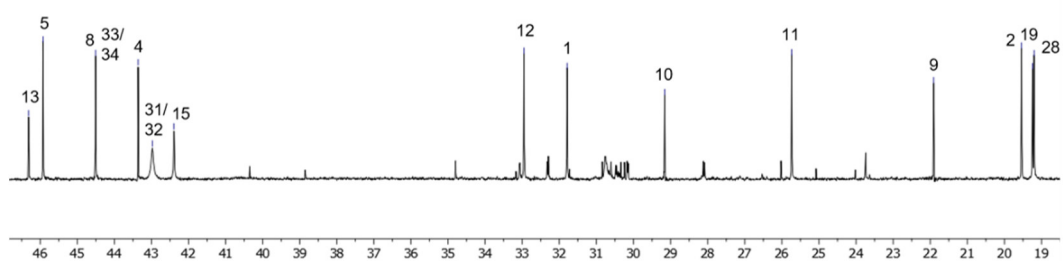

**Figure S34.** Detail of the  $^{13}\text{C}$  NMR spectrum of Cyclomicrophylline-A (5) ( $\text{CD}_3\text{OD}$ , 150 MHz).

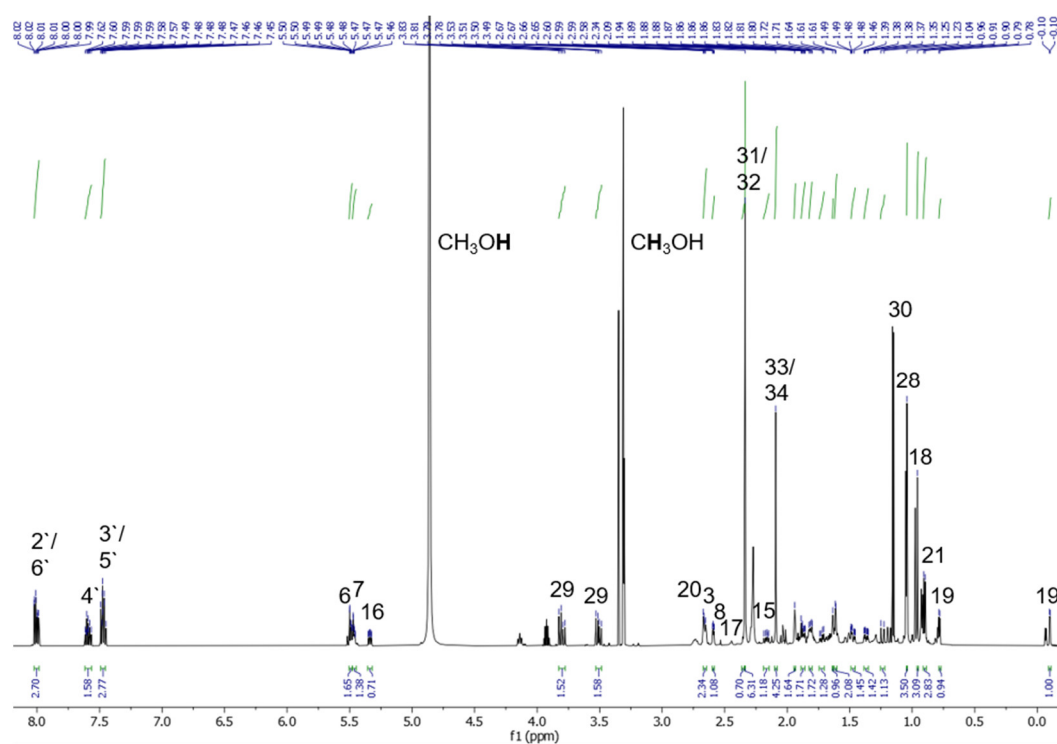

**Figure S35.**  $^1\text{H}$  NMR spectrum of Cyclomicrophyllidine-A (**6**) ( $\text{CD}_3\text{OD}$ , 600 MHz). The assignment of the signals between 1.2 and 2.0 ppm can be found in the enlarged Figure S36.

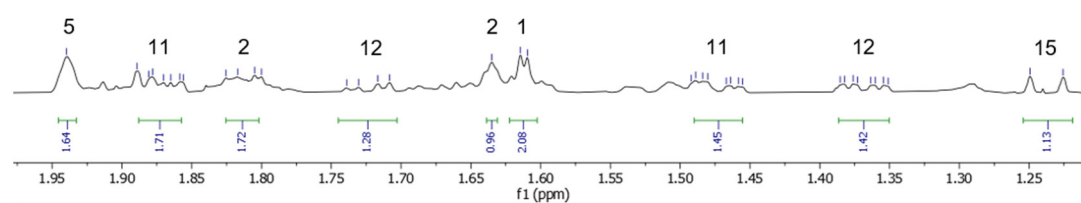

**Figure S36.** Detail of the  $^1\text{H}$  NMR spectrum of Cyclomicrophyllidine-A (**6**) ( $\text{CD}_3\text{OD}$ , 600 MHz).

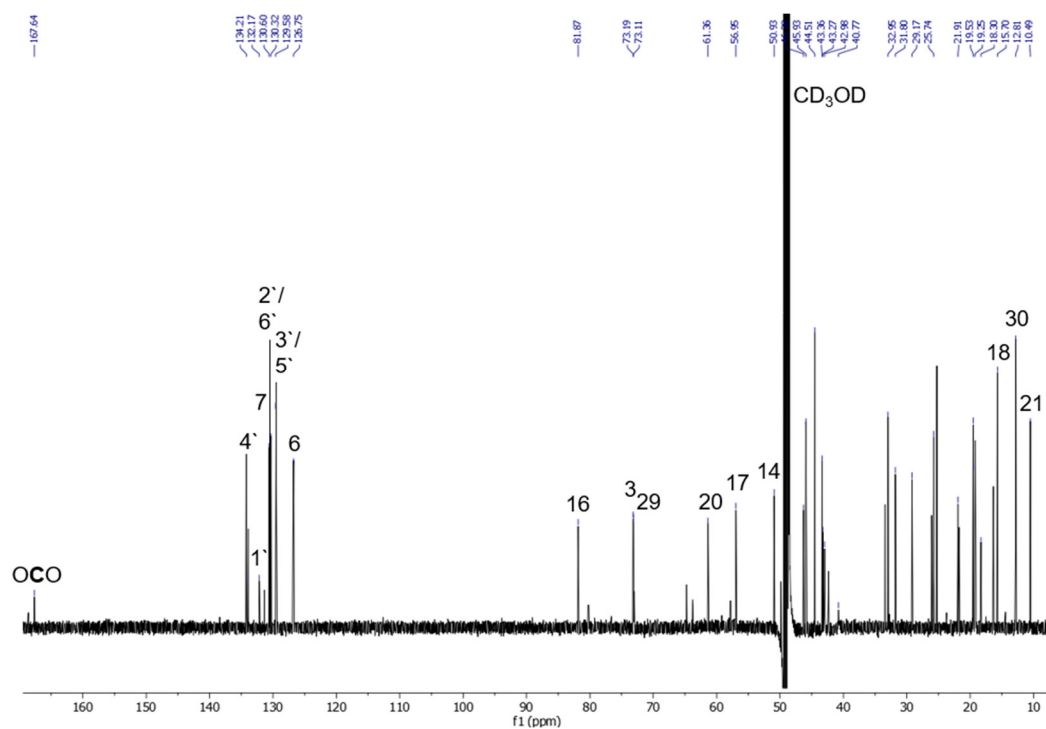

**Figure S37.** <sup>13</sup>C NMR spectrum of Cyclomicrophyllidine-A (6) (CD<sub>3</sub>OD, 150 MHz). The assignment of the signals between 18 and 47 ppm can be found in the enlarged Figure S38.

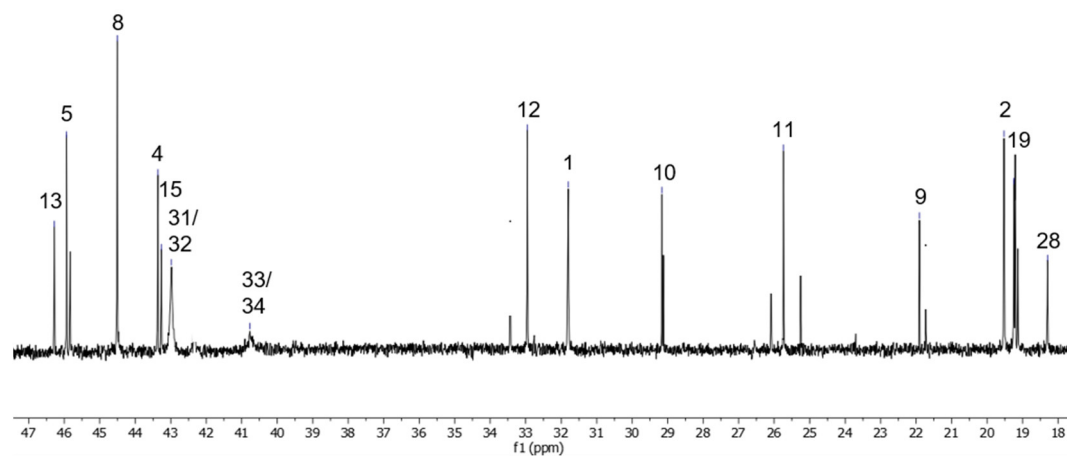

**Figure S38.** Detail of the <sup>13</sup>C NMR spectrum of Cyclomicrophyllidine-A (6) (CD<sub>3</sub>OD, 150 MHz).

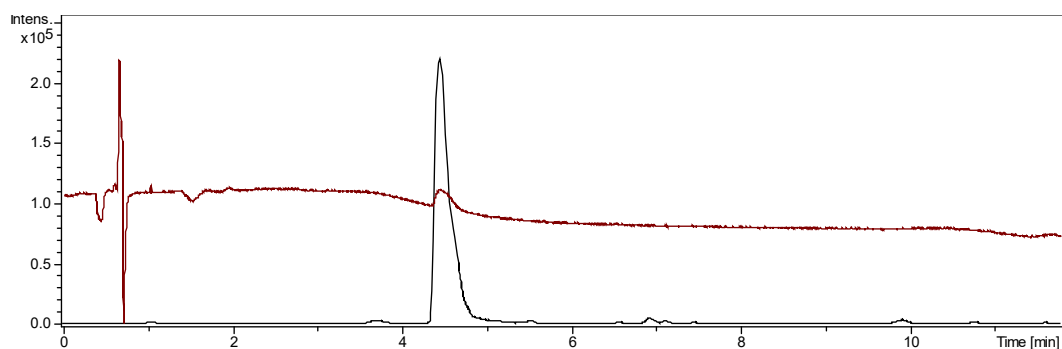

**Figure S39.** UHPLC/ESI-QqTOF-MS/MS chromatogram of Cyclomicrophyllidine-B (7). Base peak chromatogram 200.0000-1000.0000 +All MS (black); UV-Chromatogramm, 200-400 nm (red).

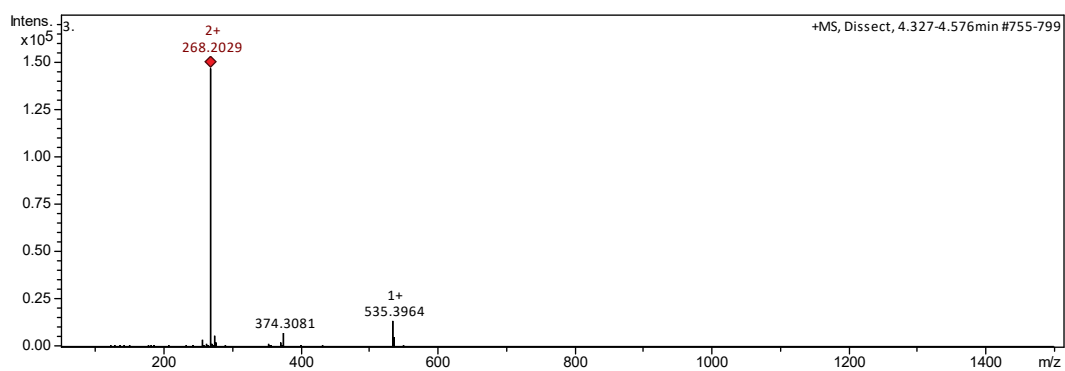

**Figure S40.** +ESI-QqTOF MS spectrum of Cyclomicrophyllidine-B (7);  $m/z$  268.2029  $[M+2H]^{2+}$  and 535.3964  $[M+H]^+$ .

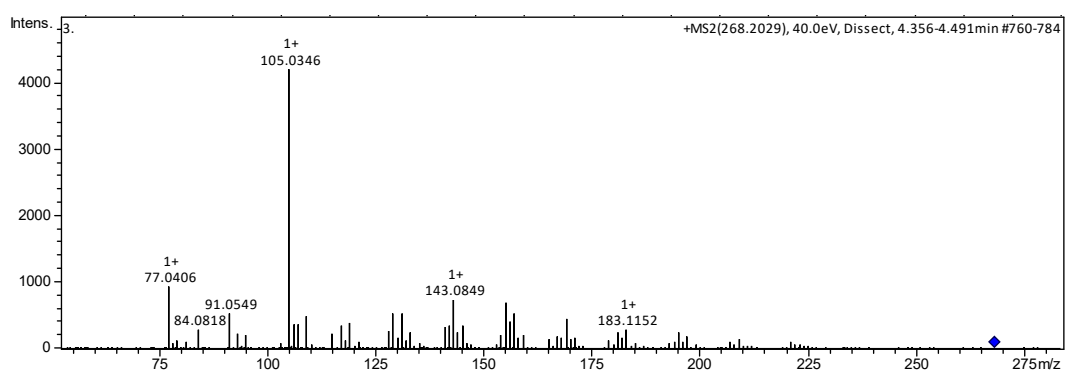

**Figure S41.** +ESI-QqTOF MS/MS spectrum of Cyclomicrophyllidine-B (7).



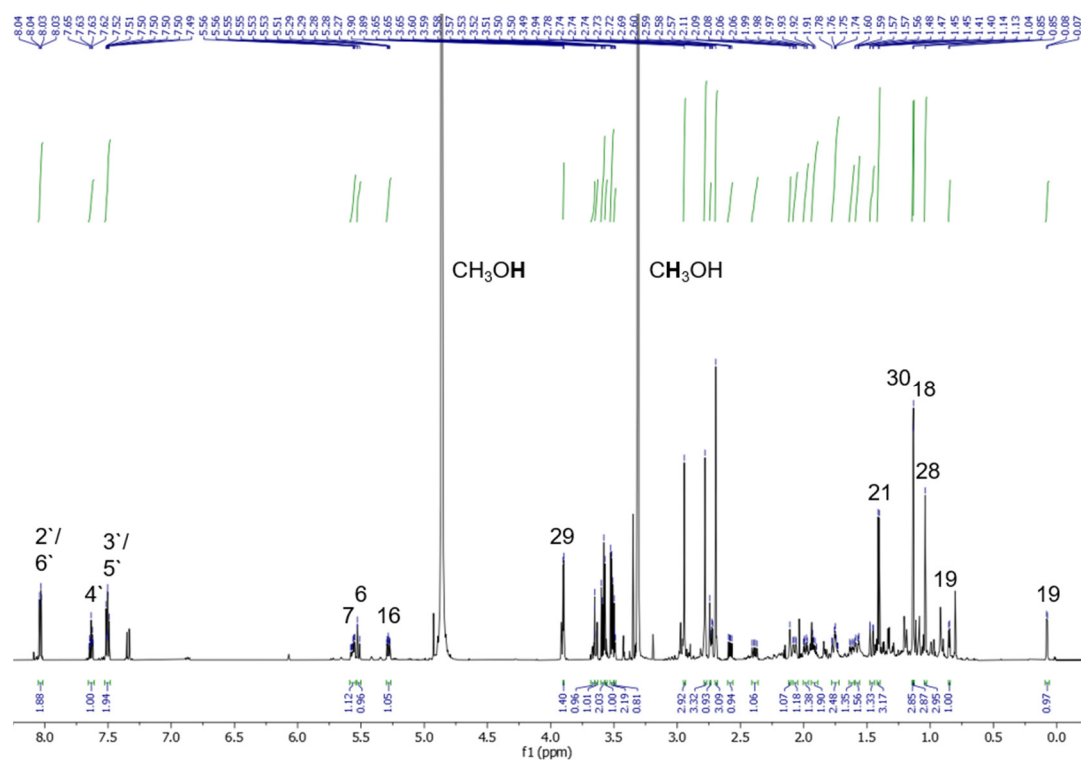

**Figure S42.**  $^1\text{H}$  NMR spectrum of Cyclomicrophyllidine-B (7) ( $\text{CD}_3\text{OD}$ , 600 MHz). The assignment of the signals between 1.45 and 3.65 ppm can be found in the enlarged Figure S43.

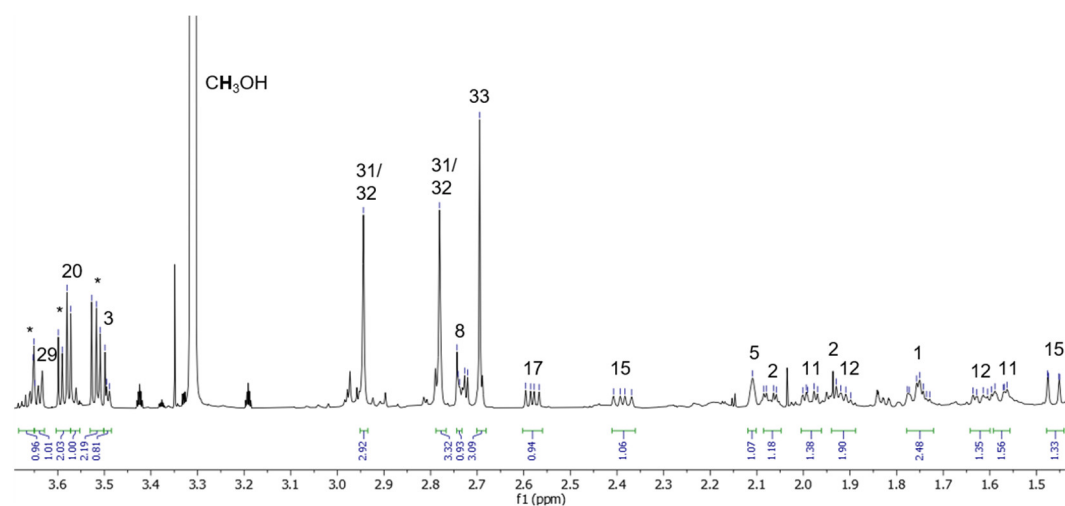

**Figure S43.** Detail of the  $^1\text{H}$  NMR spectrum of Cyclomicrophyllidine-B (7) ( $\text{CD}_3\text{OD}$ , 600 MHz) (\*signals of 9.4% glycerol).

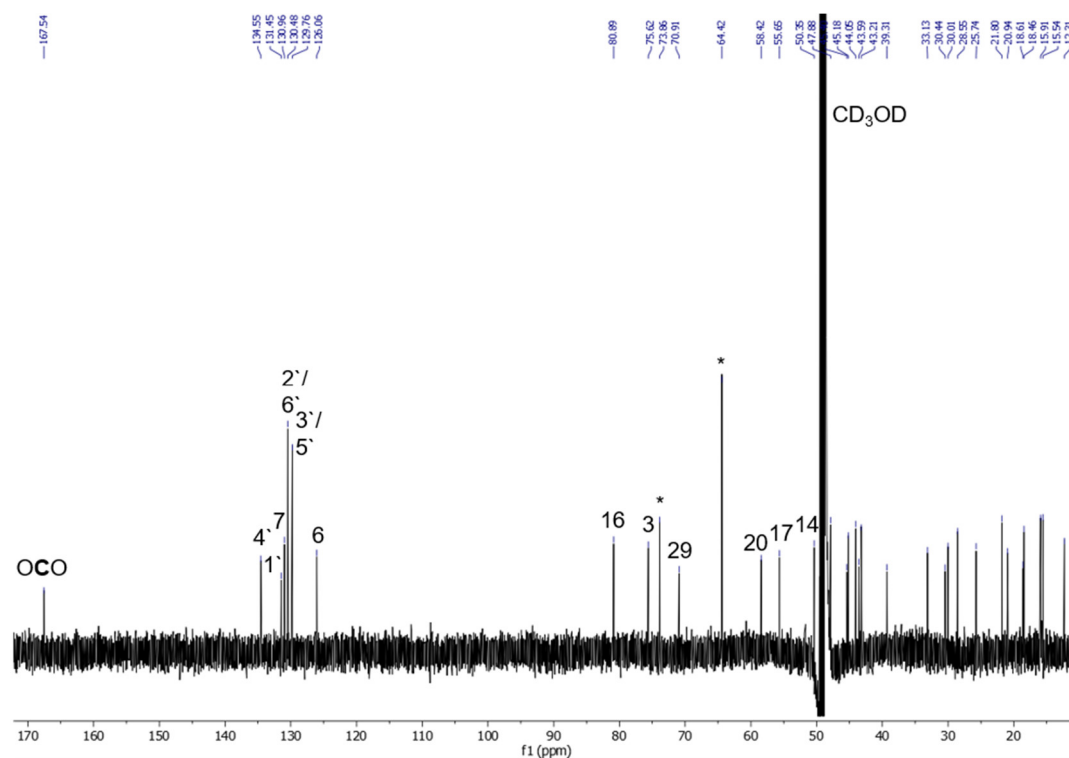

**Figure S44.** <sup>13</sup>C NMR spectrum of Cyclomicrophyllidine-B (7) (CD<sub>3</sub>OD, 150 MHz). The assignment of the signals between 11 and 48 ppm can be found in the enlarged Figure S45 (\*signals of 9.4% glycerol).

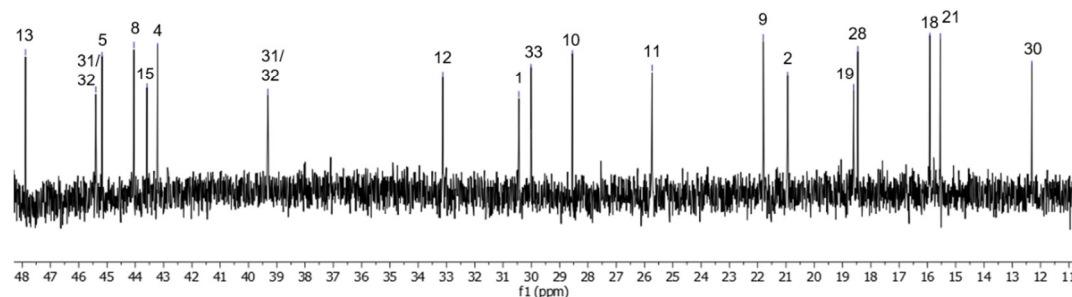

**Figure S45.** Detail of the <sup>13</sup>C NMR spectrum of Cyclomicrophyllidine-B (7) (CD<sub>3</sub>OD, 150 MHz).

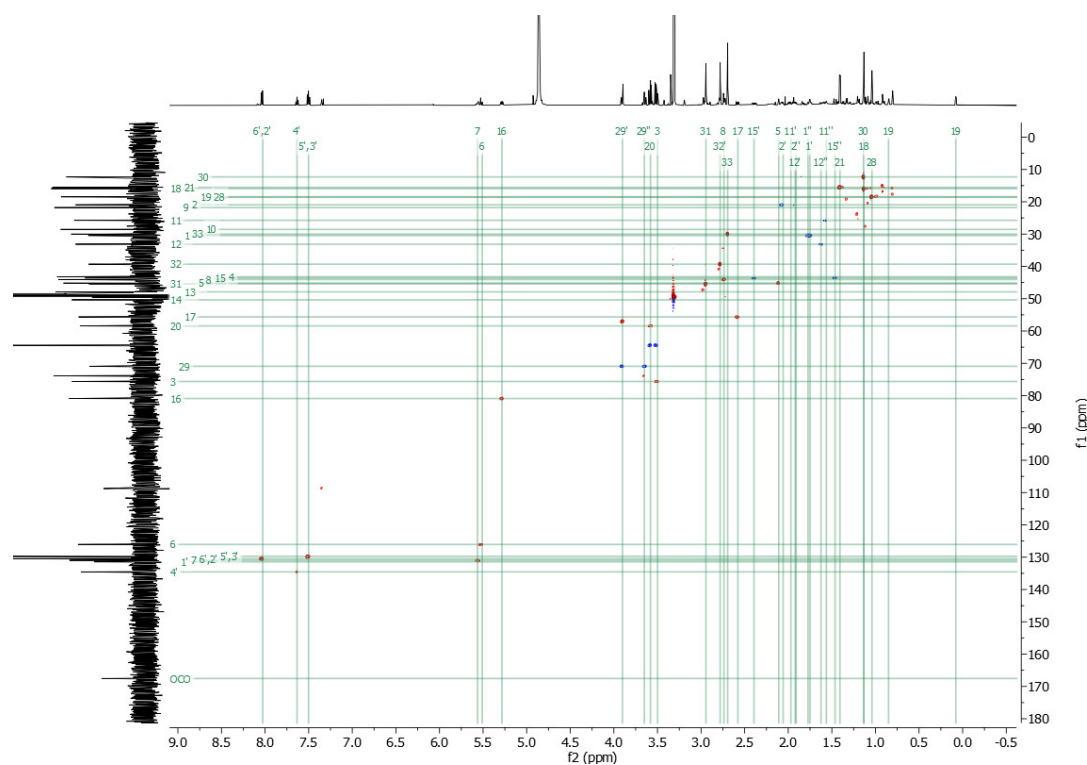

Figure S46.  $^1\text{H}/^{13}\text{C}$  HSQC spectrum of Cyclomicrophyllidine-B (7) ( $\text{CD}_3\text{OD}$ , 600/150 MHz).

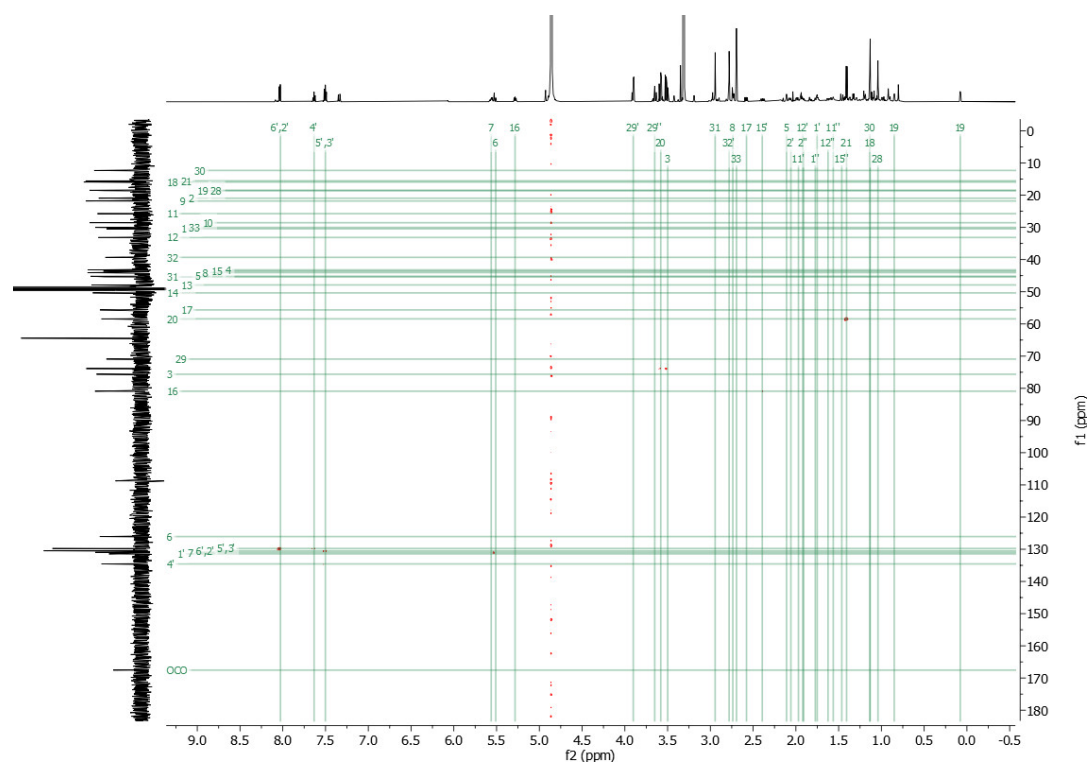

Figure S47.  $^1\text{H}/^{13}\text{C}$  H2BC spectrum of Cyclomicrophyllidine-B (7) ( $\text{CD}_3\text{OD}$ , 600/150 MHz).

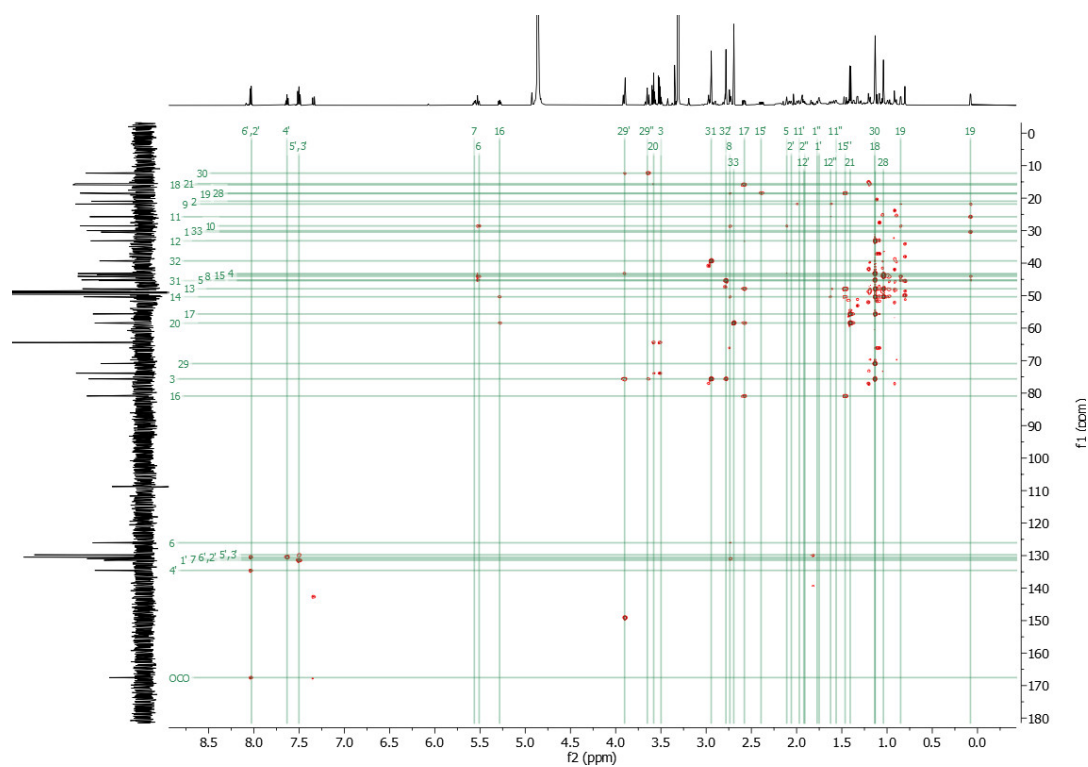

Figure S48.  $^1\text{H}/^{13}\text{C}$  HMBC spectrum of Cyclomicrophyllidine-B (7) ( $\text{CD}_3\text{OD}$ , 600/150 MHz).

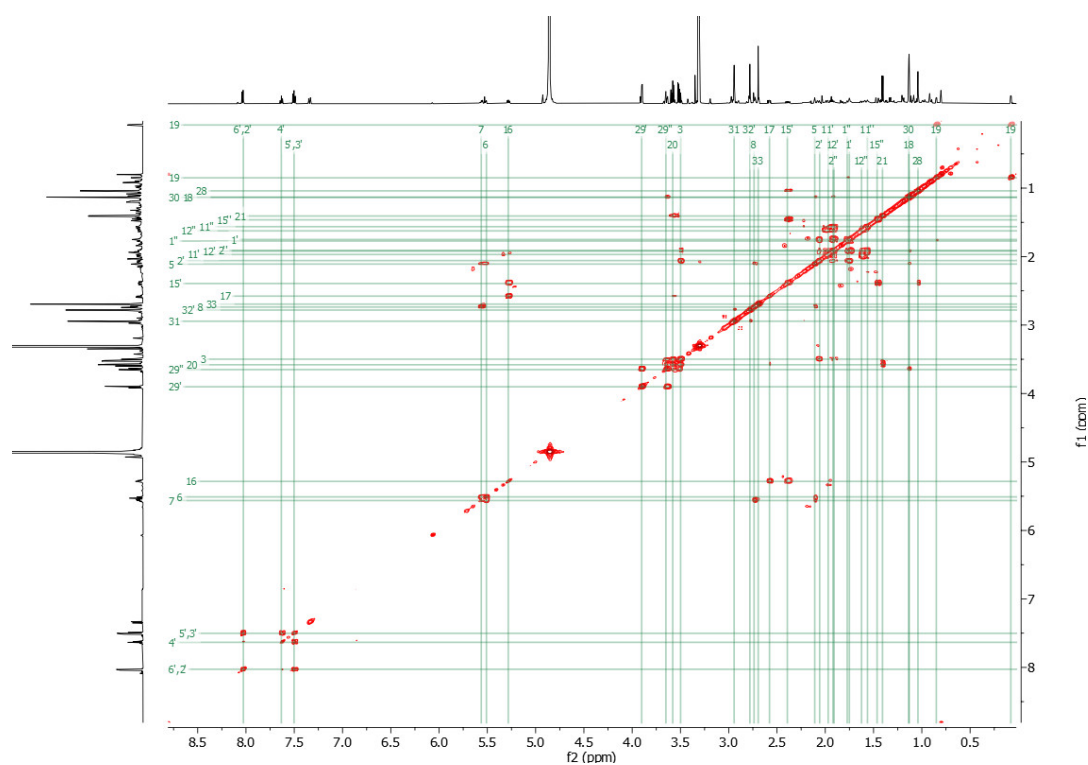

Figure S49.  $^1\text{H}/^1\text{H}$  COSY spectrum of Cyclomicrophyllidine-B (7) ( $\text{CD}_3\text{OD}$ , 600 MHz).

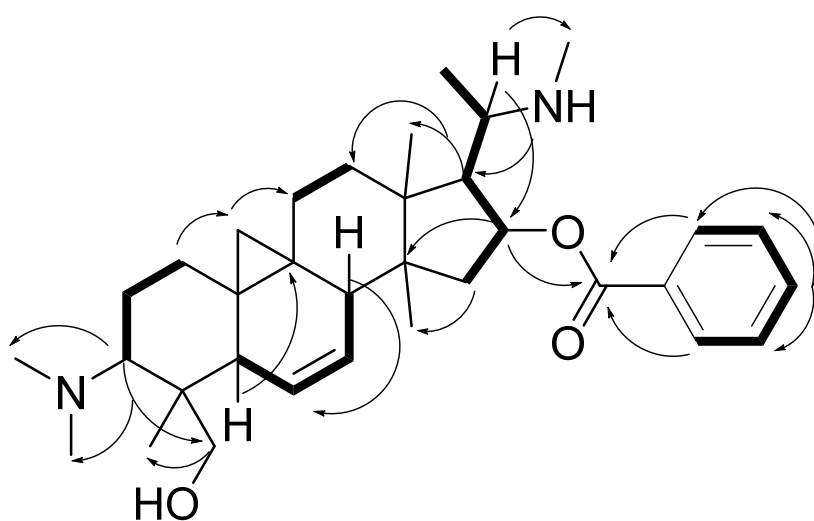

**Figure S50.** Key COSY (bold lines) and HMBC (arrows) correlations of Cycломicrophyllidine-B (7).

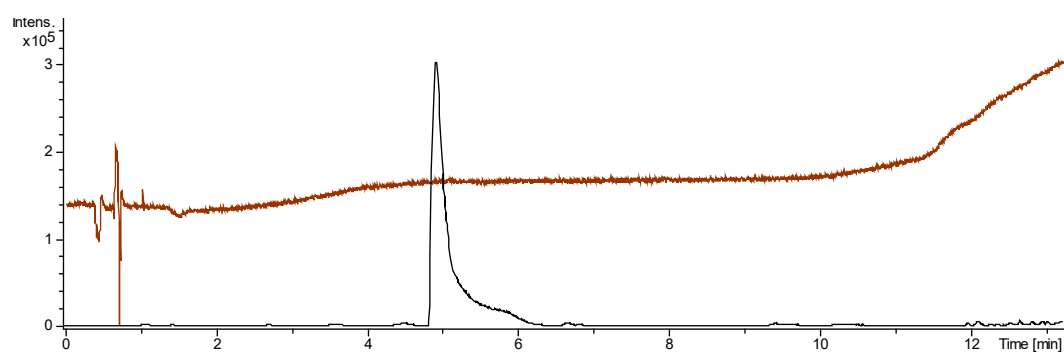

**Figure S51.** UHPLC/ESI-QqTOF-MS/MS chromatogram of O-benzoyl-cycloprotobuxoline-D (8). Base peak chromatogram 200.0000-1000.0000 +All MS (black); UV-Chromatogram, 200-400 nm (red).

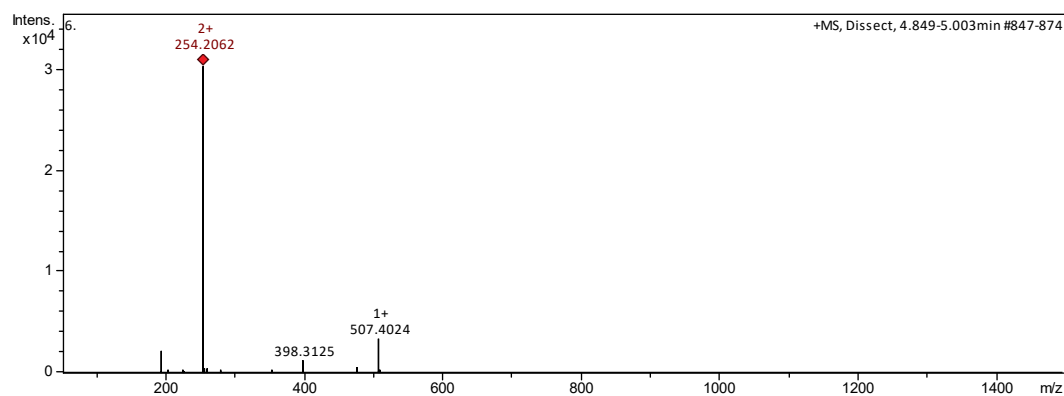

**Figure S52.** +ESI-QqTOF MS spectrum of O-benzoyl-cycloprotobuxoline-D (8);  $m/z$  254.2062  $[M+2H]^{2+}$  and 507.4042  $[M+H]^+$ .

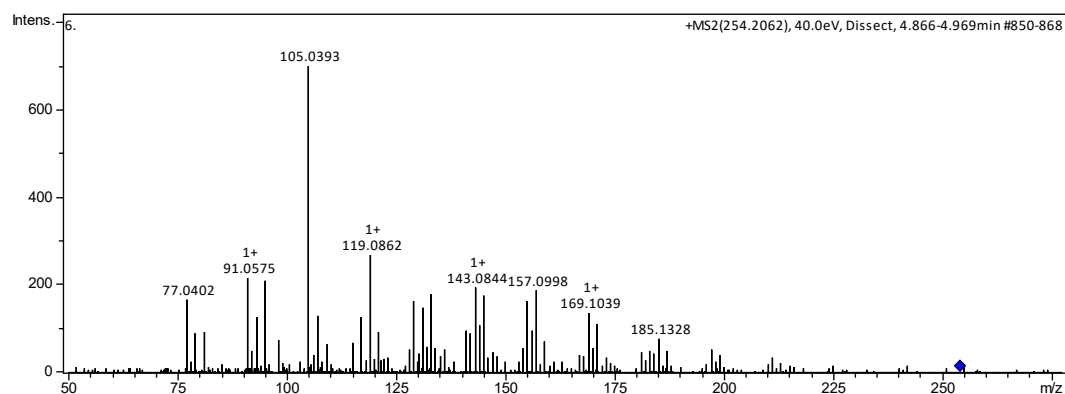

**Figure S53.** +ESI-QqTOF MS/MS spectrum of O-benzoyl-cycloprotobuxoline-D (8).

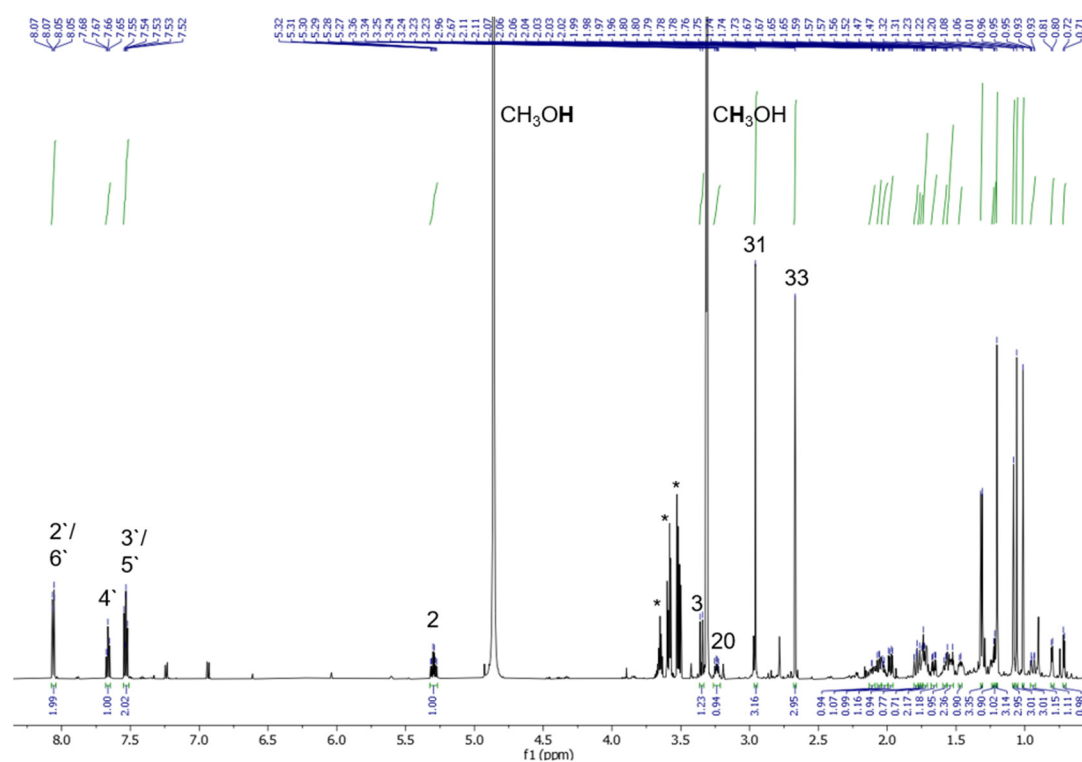

**Figure S54.**  $^1\text{H}$  NMR spectrum of O-benzoyl-cycloprotobuxoline-D (8) ( $\text{CD}_3\text{OD}$ , 600 MHz). The assignment of the signals between 0.7 and 2.15 ppm can be found in the enlarged Figure S55 (\*signals of 17.2% glycerol).

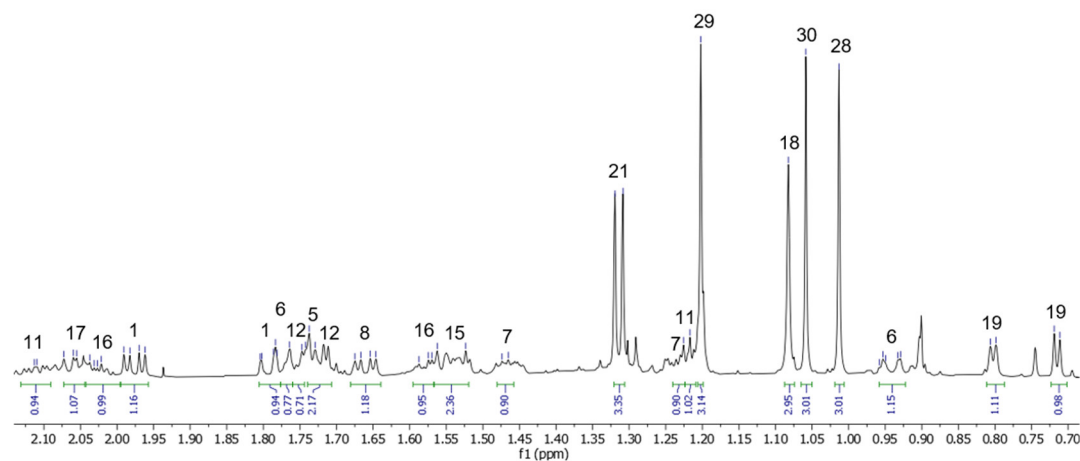

**Figure S55.** Detail of the  $^1\text{H}$  NMR spectrum of O-benzoyl-cycloprotobuxoline-D (**8**) ( $\text{CD}_3\text{OD}$ , 600 MHz).

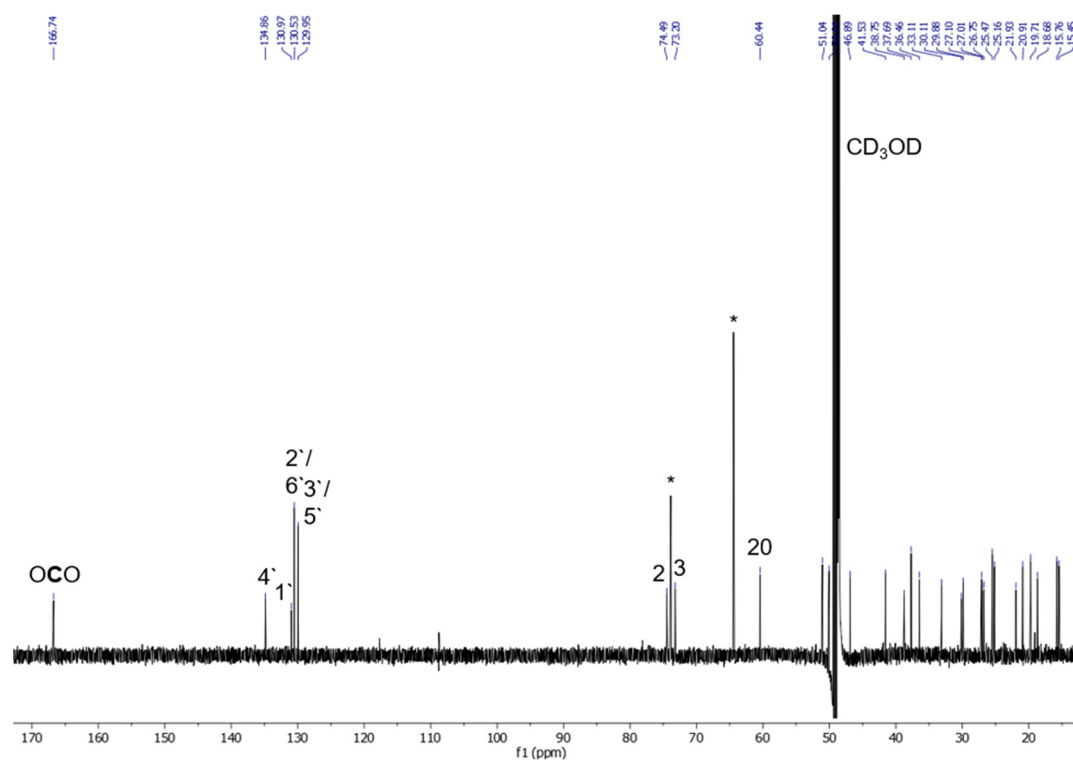

**Figure S56.**  $^{13}\text{C}$  NMR spectrum of O-benzoyl-cycloprotobuxoline-D (**8**) ( $\text{CD}_3\text{OD}$ , 150 MHz). The assignment of the signals between 15 and 52 ppm can be found in the enlarged Figure S57 (\*signals of 17.2% glycerol).

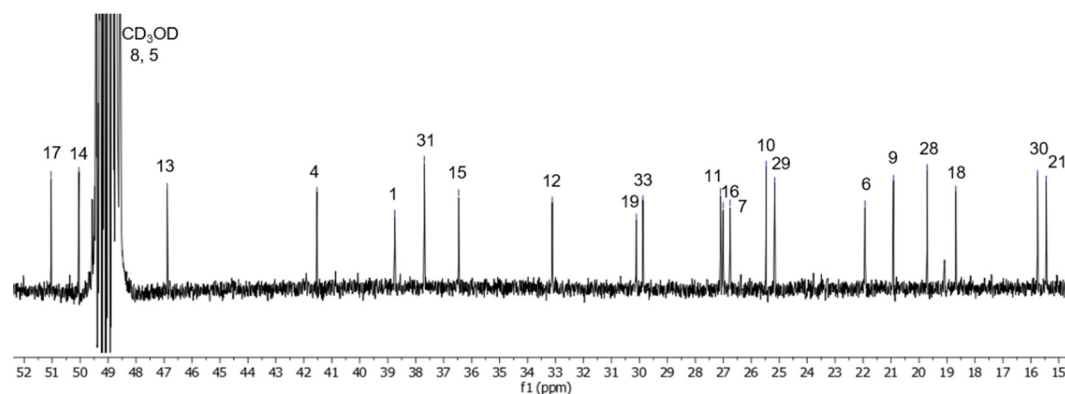

**Figure S57.** Detail of the  $^{13}\text{C}$  NMR spectrum of O-benzoyl-cycloprotobuxoline-D (8) ( $\text{CD}_3\text{OD}$ , 150 MHz).

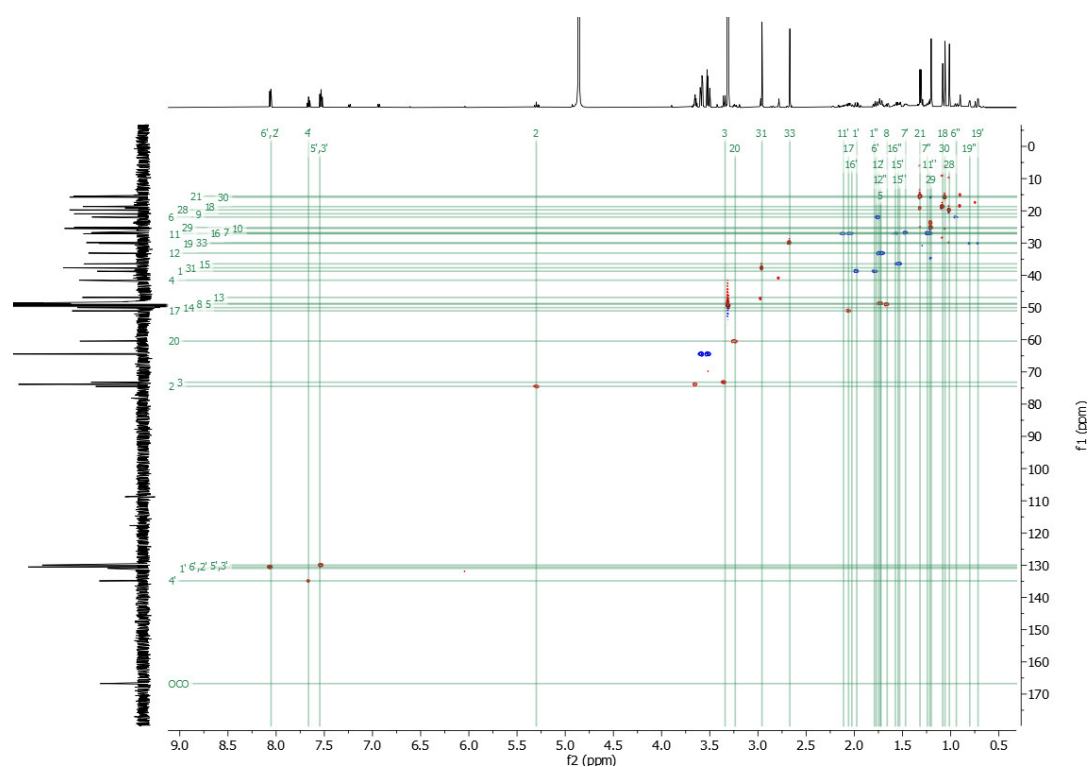

**Figure S58.**  $^1\text{H}/^{13}\text{C}$  HSQC spectrum of O-benzoyl-cycloprotobuxoline-D (8) ( $\text{CD}_3\text{OD}$ , 600/150 MHz).



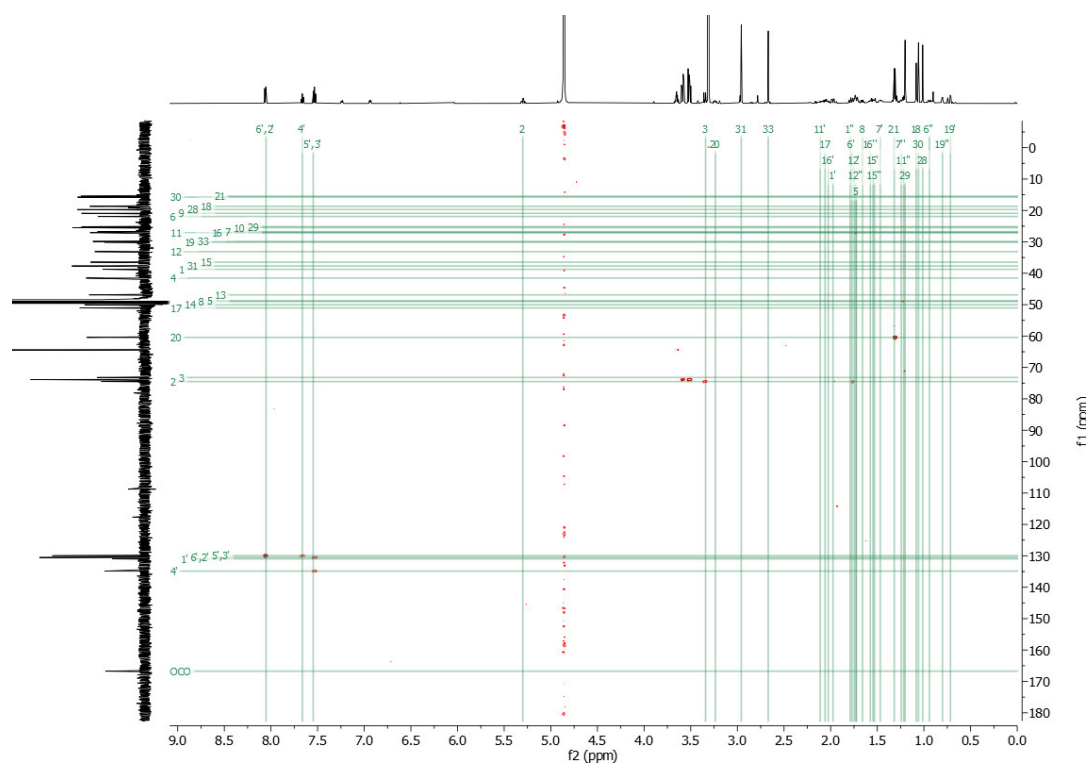

**Figure S59.**  $^1\text{H}/^{13}\text{C}$  H2BC spectrum of O-benzoyl-cycloprotobuxoline-D (**8**) ( $\text{CD}_3\text{OD}$ , 600/150 MHz).

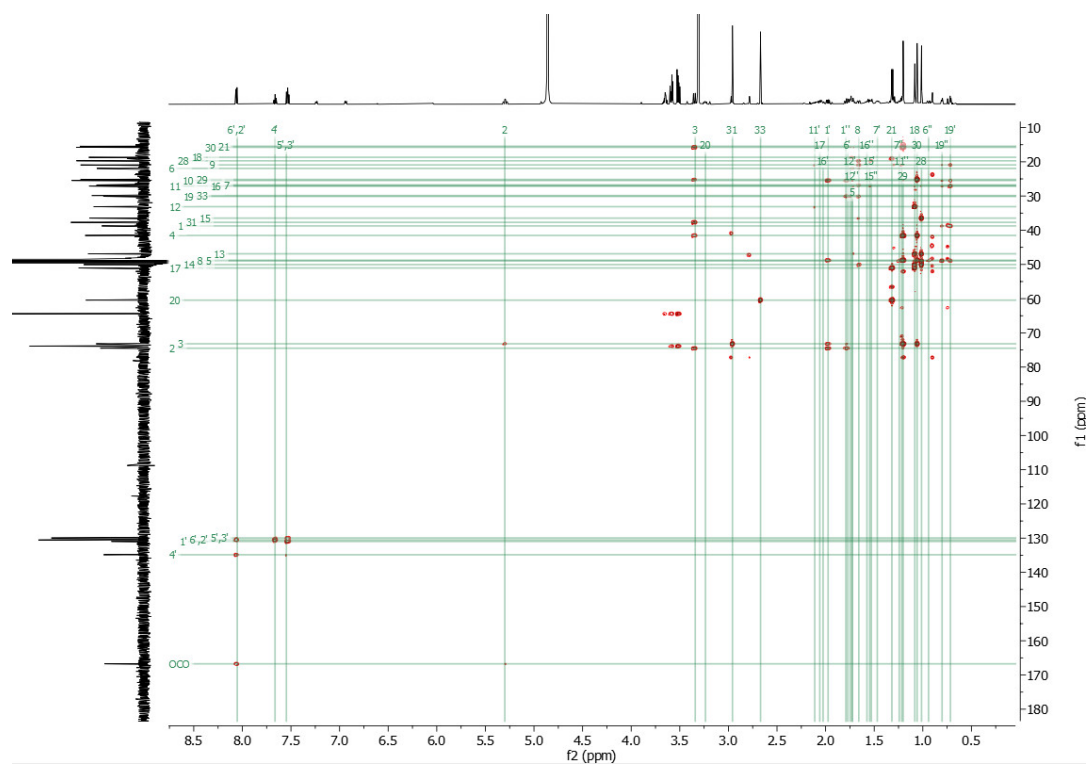

**Figure S60.**  $^1\text{H}/^{13}\text{C}$  HMBC spectrum of O-benzoyl-cycloprotobuxoline-D (**8**) ( $\text{CD}_3\text{OD}$ , 600/150 MHz).

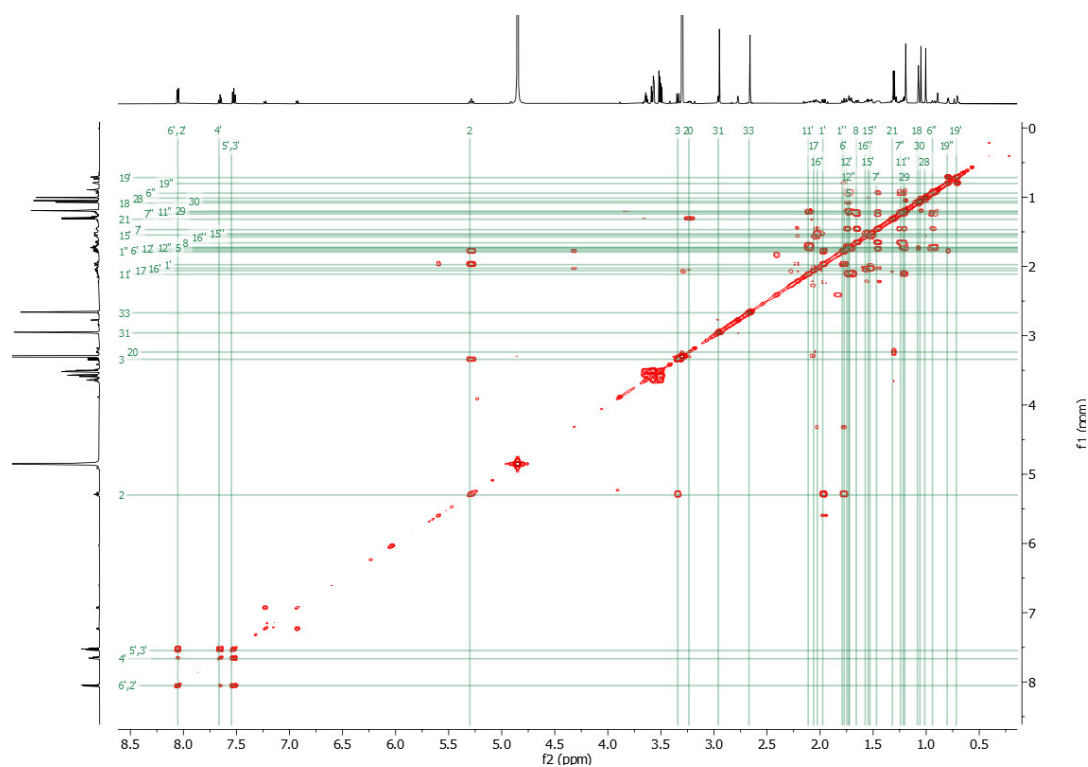

Figure S61.  $^1\text{H}/^1\text{H}$  COSY spectrum of O-benzoyl-cycloprotobuxoline-D (8) ( $\text{CD}_3\text{OD}$ , 600 MHz).

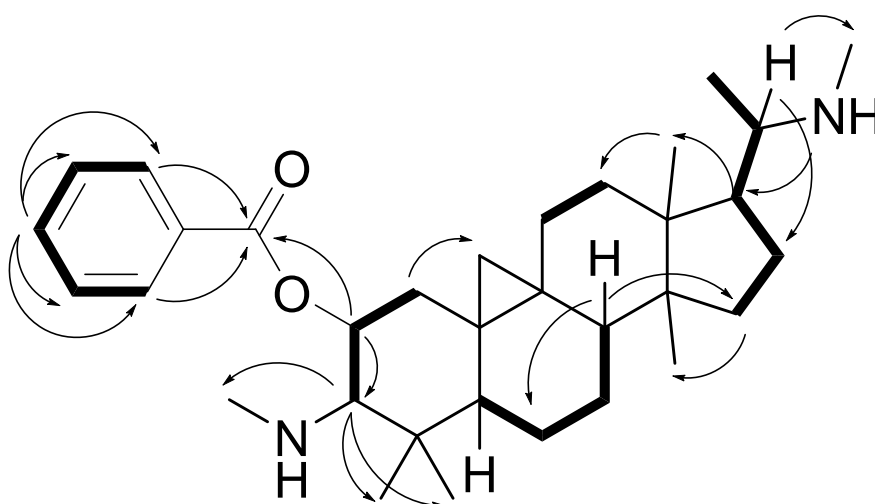

Figure S62. Key COSY (bold lines) and HMBC (arrows) correlations of O-benzoyl-cycloprotobuxoline-D (8).

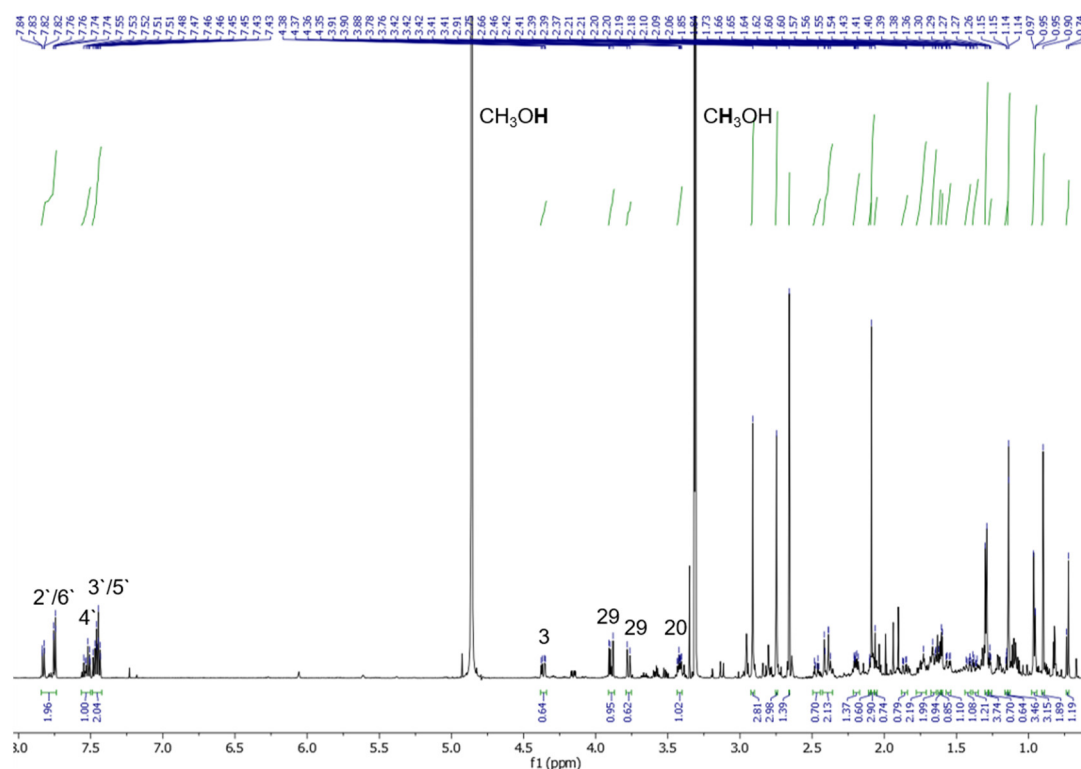

**Figure S63.**  $^1\text{H}$  NMR spectrum of N-benzoyl-O-acetyl-cycloxo-buxoline-F (9) ( $\text{CD}_3\text{OD}$ , 600 MHz). The assignment of the signals between 0.85 and 2.93 ppm can be found in the enlarged Figure S64.

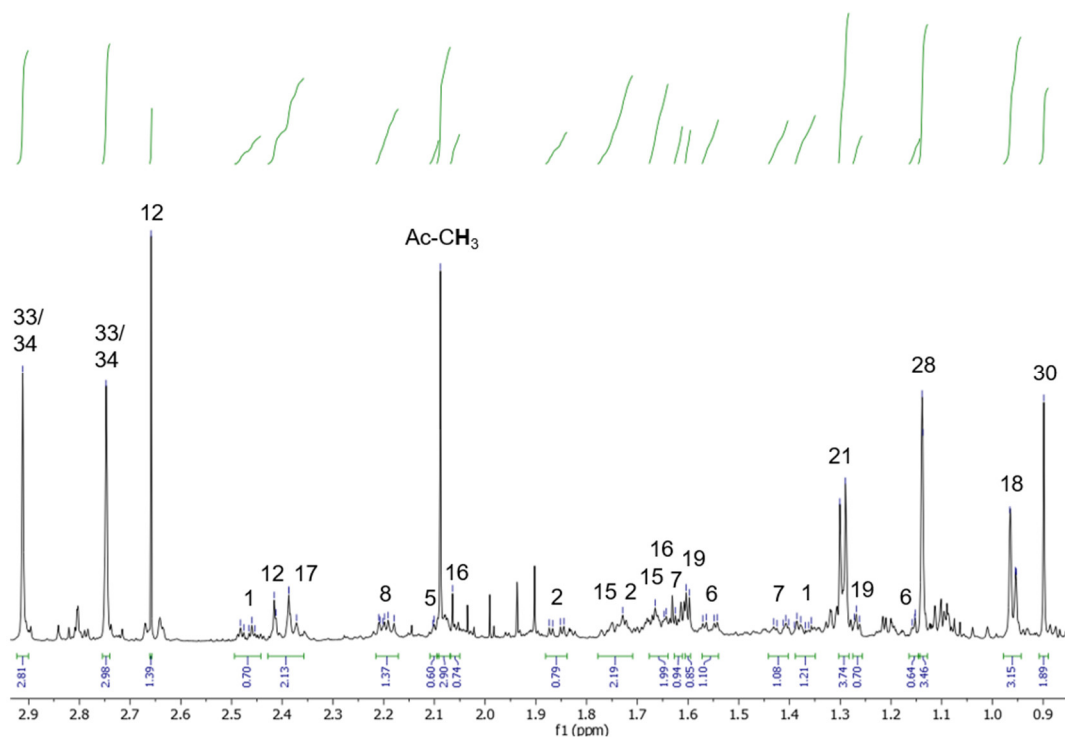

**Figure S64.** Detail of the  $^1\text{H}$  NMR spectrum of N-benzoyl-O-acetyl-cycloxo-buxoline-F (9) ( $\text{CD}_3\text{OD}$ , 600 MHz).

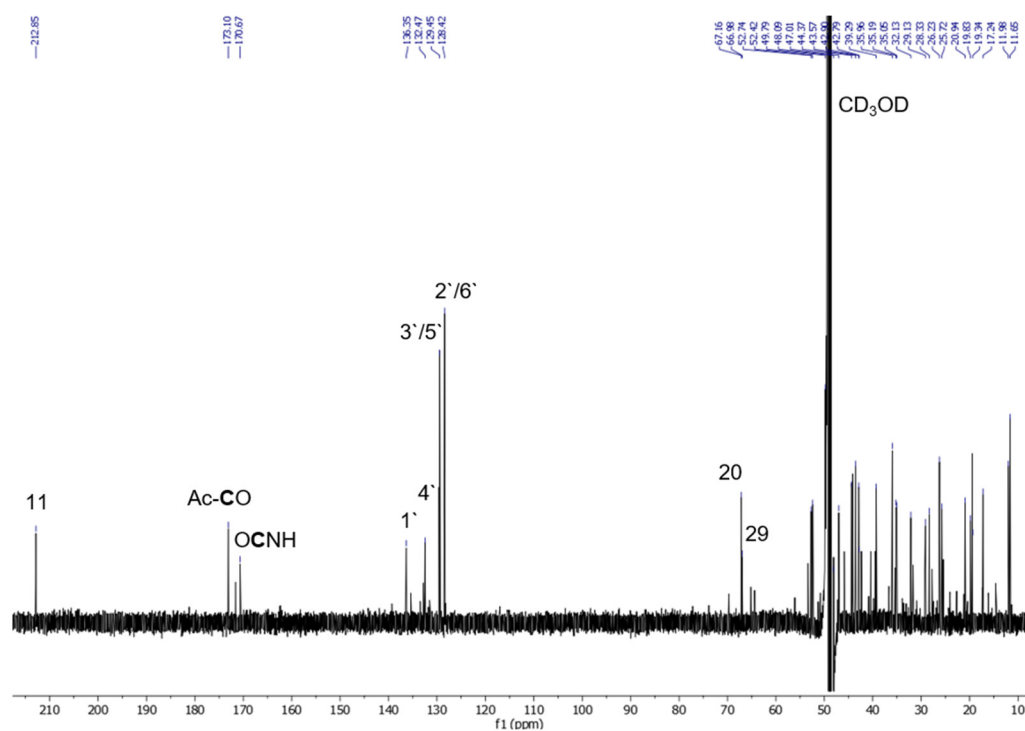

**Figure S65.**  $^{13}\text{C}$  NMR spectrum of N-benzoyl-O-acetyl-cycloxo-buxoline-F (9) ( $\text{CD}_3\text{OD}$ , 150 MHz). The assignment of the signals between 11.5 and 52.8 ppm can be found in the enlarged Figure S66.

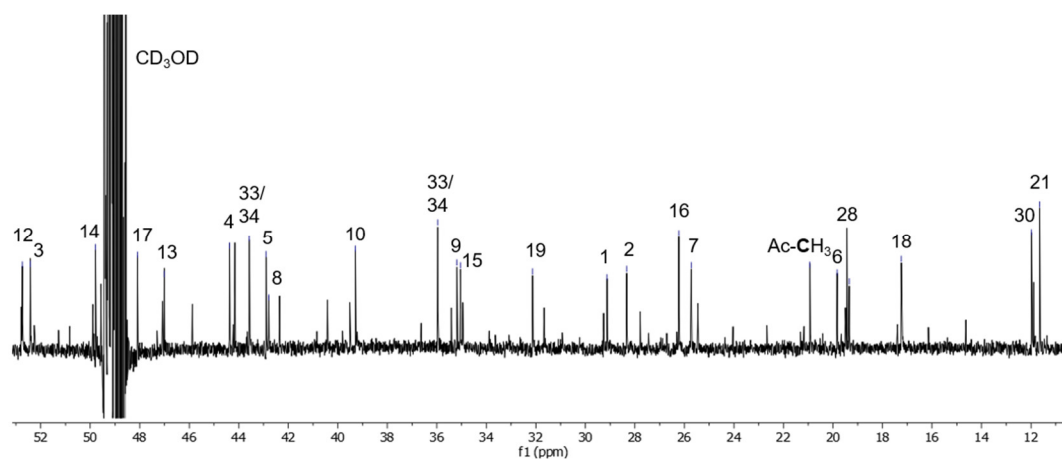

**Figure S66.** Detail of the  $^{13}\text{C}$  NMR spectrum of N-benzoyl-O-acetyl-cycloxo-buxoline-F (9) ( $\text{CD}_3\text{OD}$ , 150 MHz).

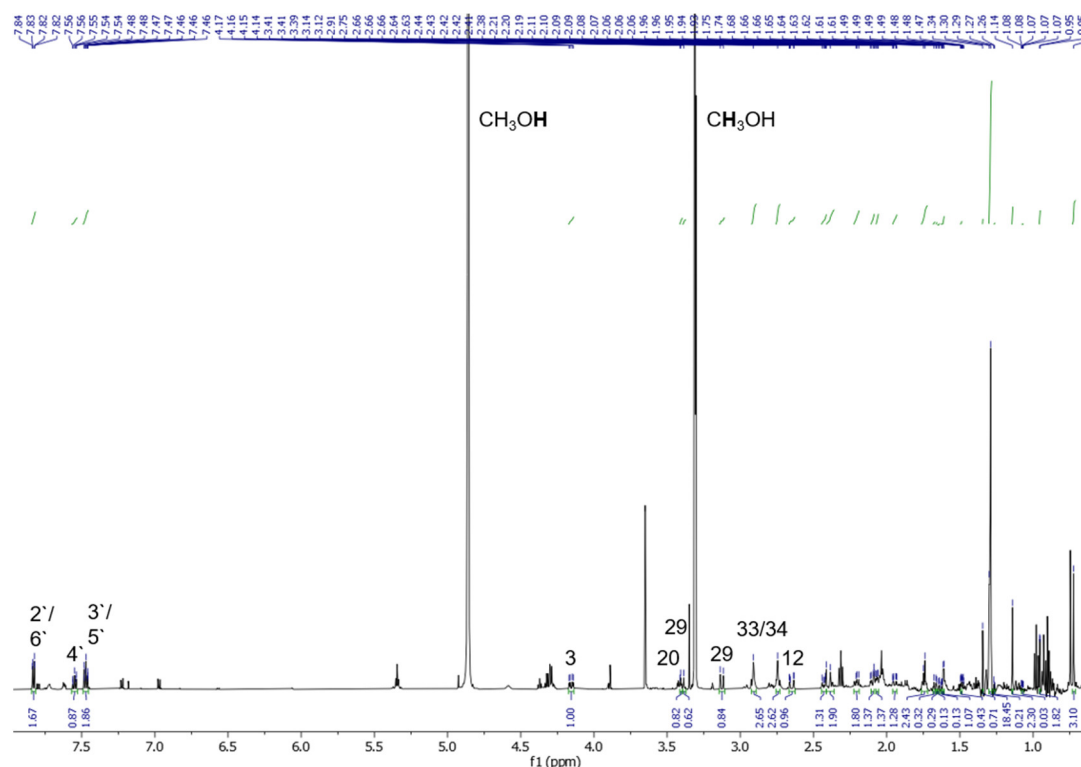

**Figure S67.**  $^1\text{H}$  NMR spectrum of N-benzoyl-cycloxo-buxoline-F (**10**) ( $\text{CD}_3\text{OD}$ , 600 MHz). The assignment of the signals between 0.7 and 2.5 ppm can be found in the enlarged Figure S68.

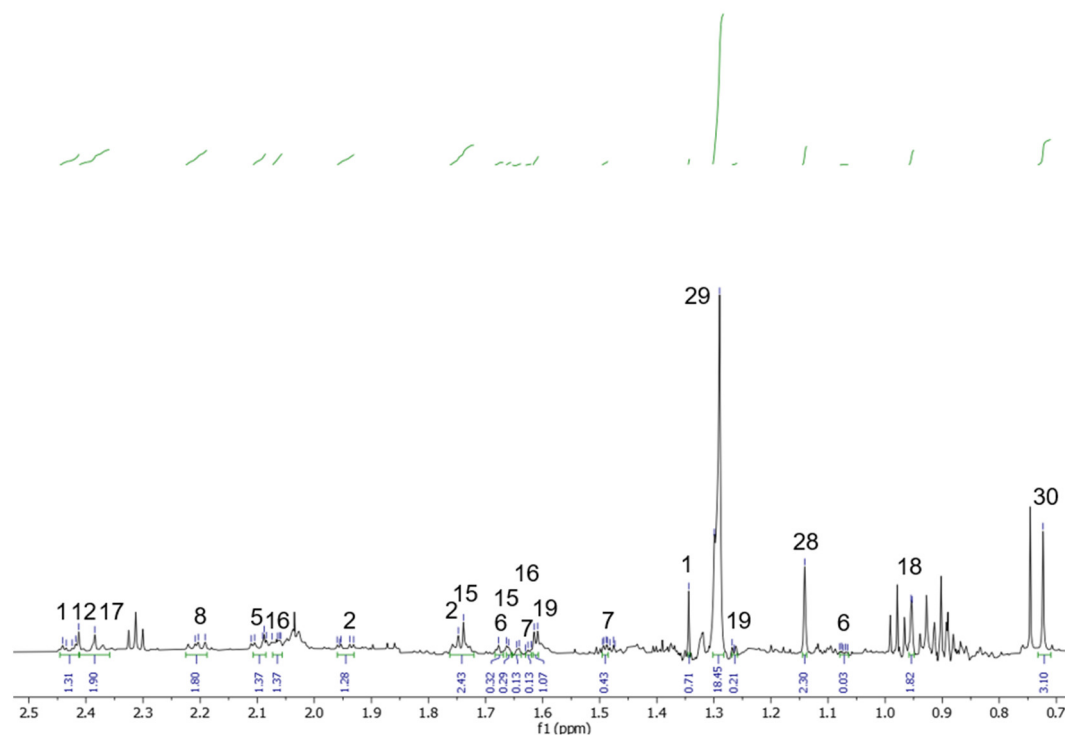

**Figure S68.** Detail of the  $^1\text{H}$  NMR spectrum of N-benzoyl-cycloxo-buxoline-F (**10**) ( $\text{CD}_3\text{OD}$ , 600 MHz).

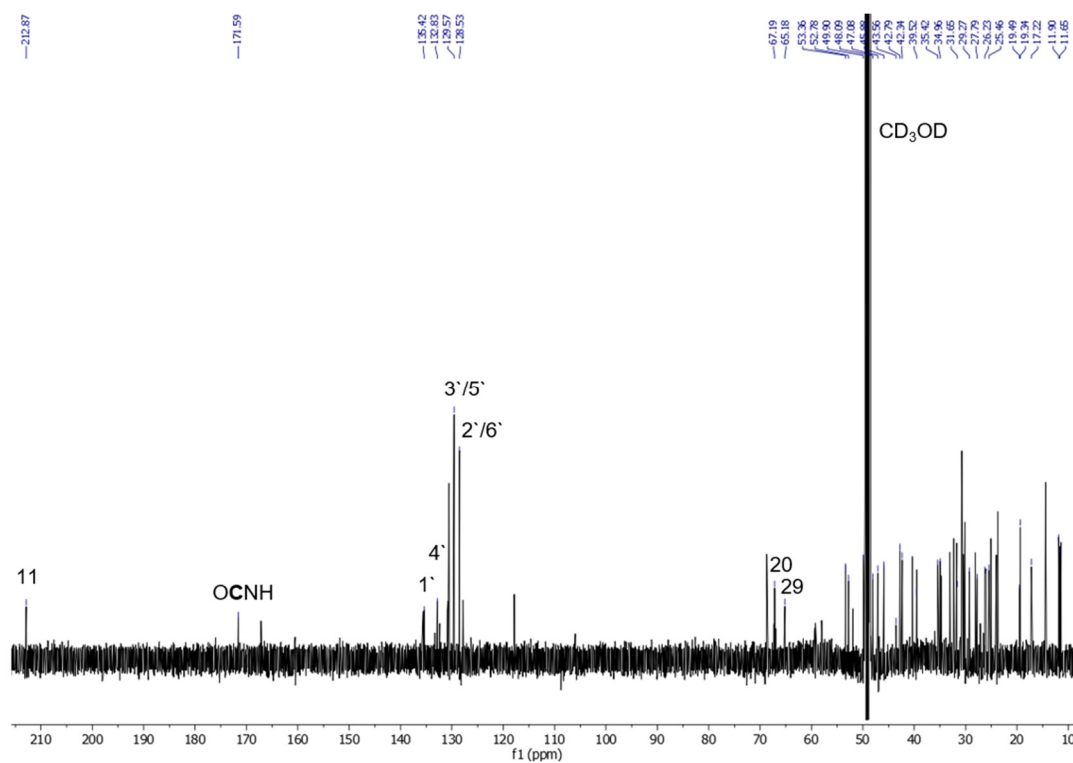

**Figure S69.**  $^{13}\text{C}$  NMR spectrum of N-benzoyl-cyclooxo-buxoline-F (**10**) ( $\text{CD}_3\text{OD}$ , 150 MHz). The assignment of the signals between 11 and 54 ppm can be found in the enlarged Figure S70.

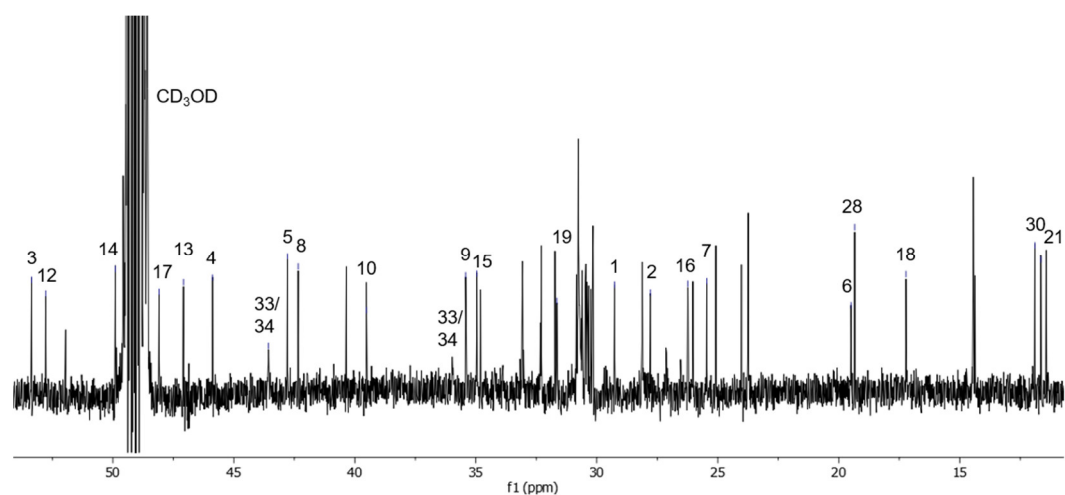

**Figure S70.** Detail of the  $^{13}\text{C}$  NMR spectrum of N-benzoyl-cyclooxo-buxoline-F (**10**) ( $\text{CD}_3\text{OD}$ , 150 MHz).

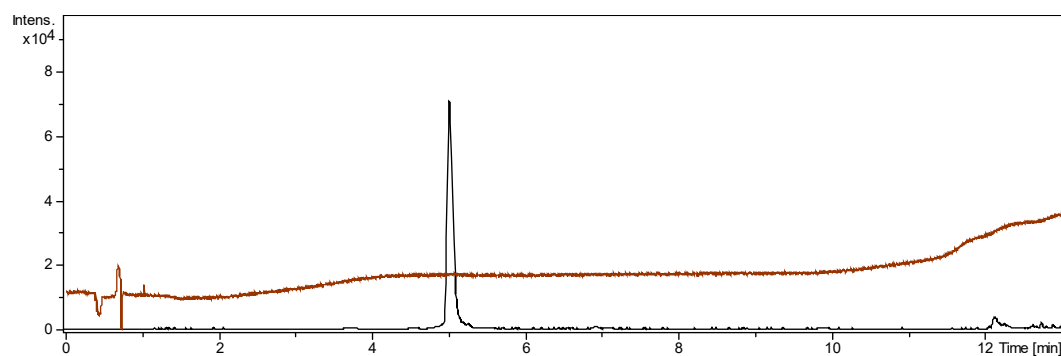

**Figure S71.** UHPLC/ESI-QqTOF-MS/MS chromatogram of 29-hydroxy-cyclomikuranine-L (**11**). Base peak chromatogram 200.0000-1000.0000 +All MS (black); UV-Chromatogramm, 200-400 nm (red).

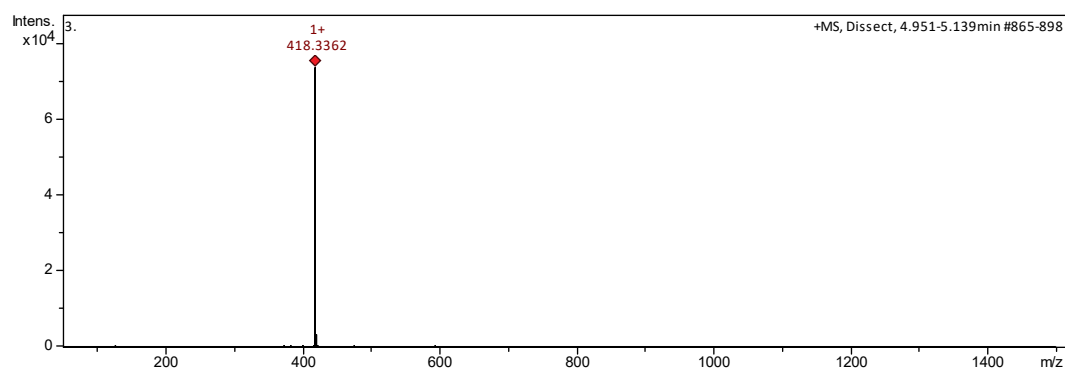

**Figure S72.** +ESI-QqTOF MS spectrum of 29-hydroxy-cyclomikuranine-L (**11**);  $m/z$  418.3362  $[M+H]^+$ .

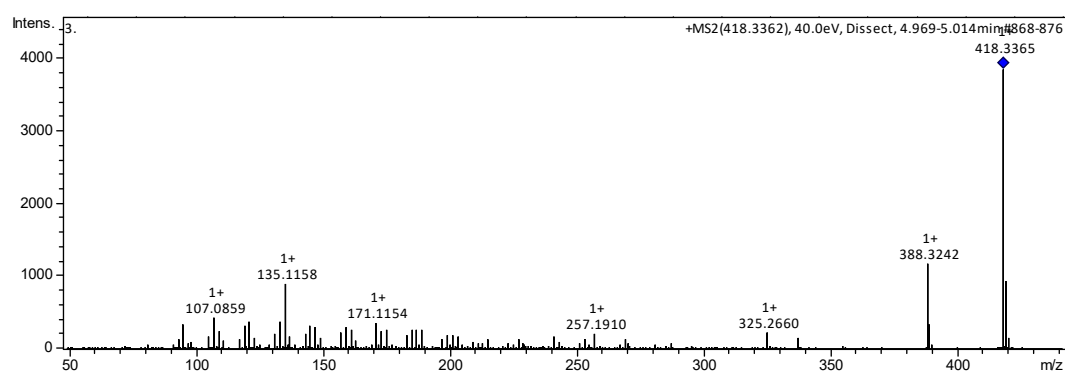

**Figure S73.** +ESI-QqTOF MS/MS spectrum of 29-hydroxy-cyclomikuranine-L (**11**).

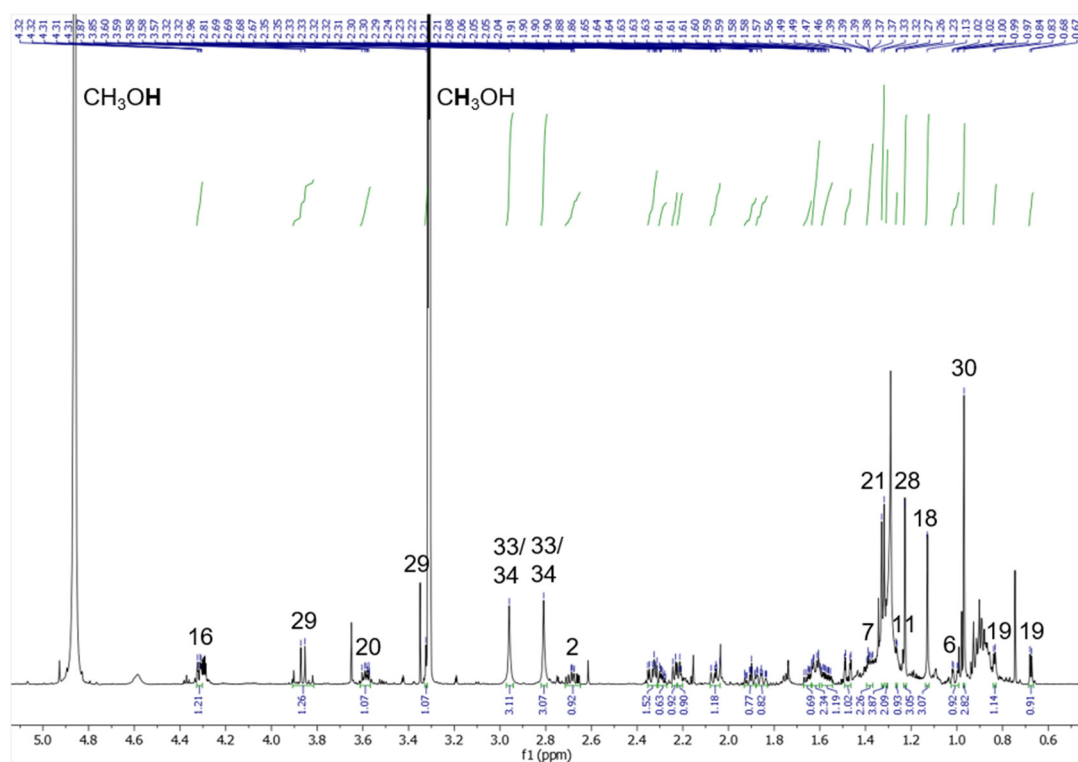

**Figure S74.**  $^1\text{H}$  NMR spectrum of 29-hydroxy-cyclomikuranine-L (**11**) ( $\text{CD}_3\text{OD}$ , 600 MHz). The assignment of the signals between 1.45 and 2.4 ppm can be found in the enlarged Figure S75.

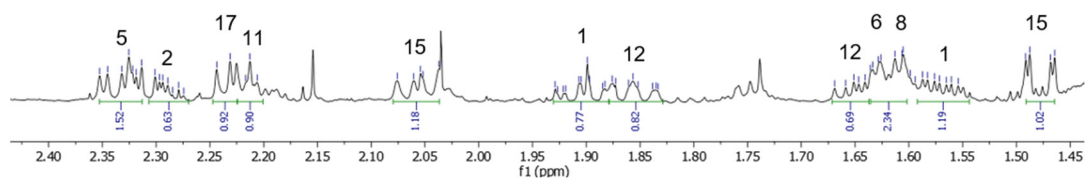

**Figure S75.** Detail of the  $^1\text{H}$  NMR spectrum of 29-hydroxy-cyclomikuranine-L (**11**) ( $\text{CD}_3\text{OD}$ , 600 MHz).



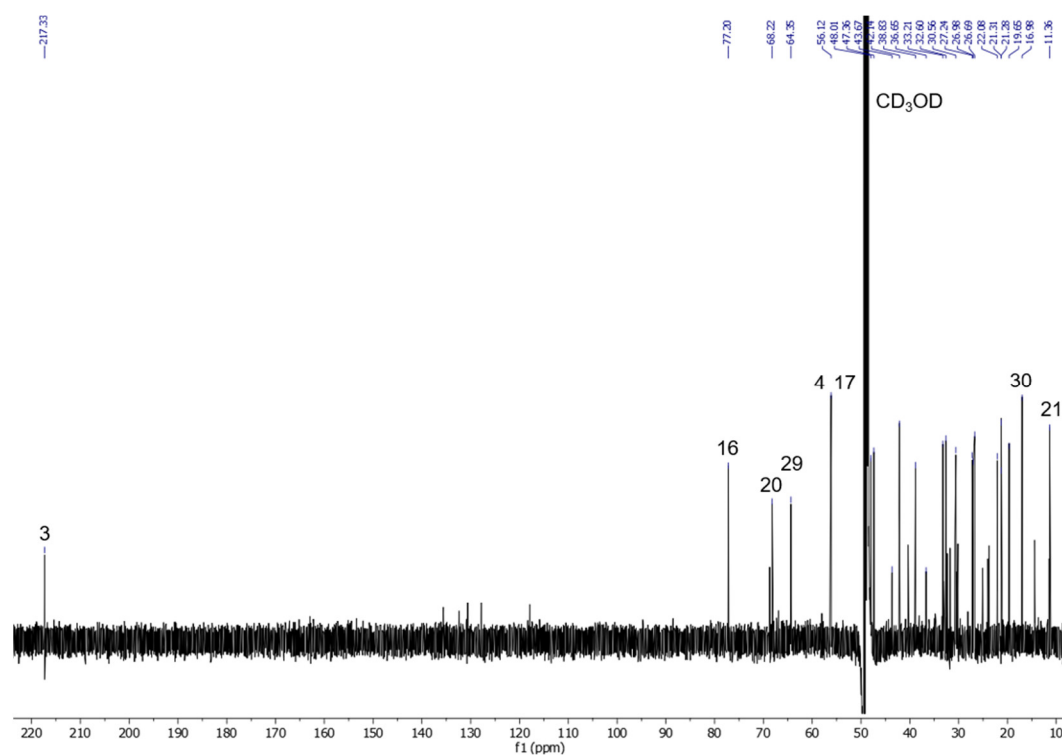

**Figure S76.** <sup>13</sup>C NMR spectrum of 29-hydroxy-cyclomikuranine-L (**11**) (CD<sub>3</sub>OD, 150 MHz). The assignment of the signals between 19 and 49.5 ppm can be found in the enlarged Figure S77.

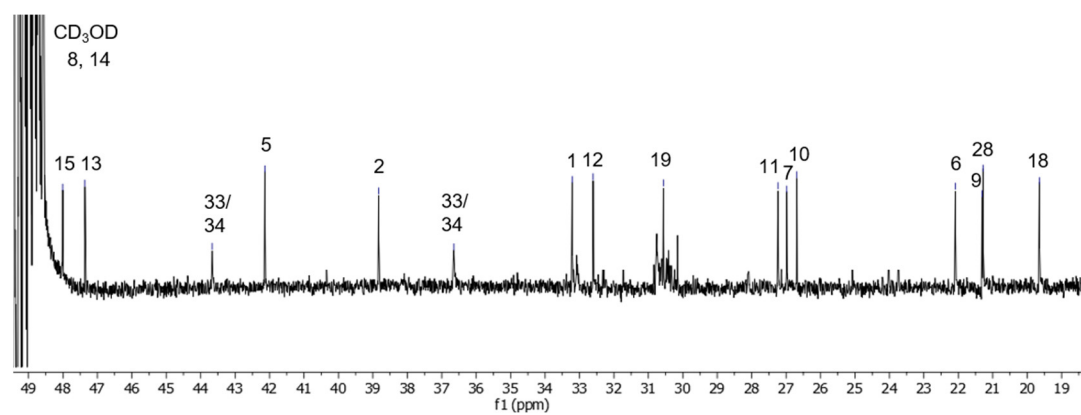

**Figure S77.** Detail of the <sup>13</sup>C NMR spectrum of 29-hydroxy-cyclomikuranine-L (**11**) (CD<sub>3</sub>OD, 150 MHz).

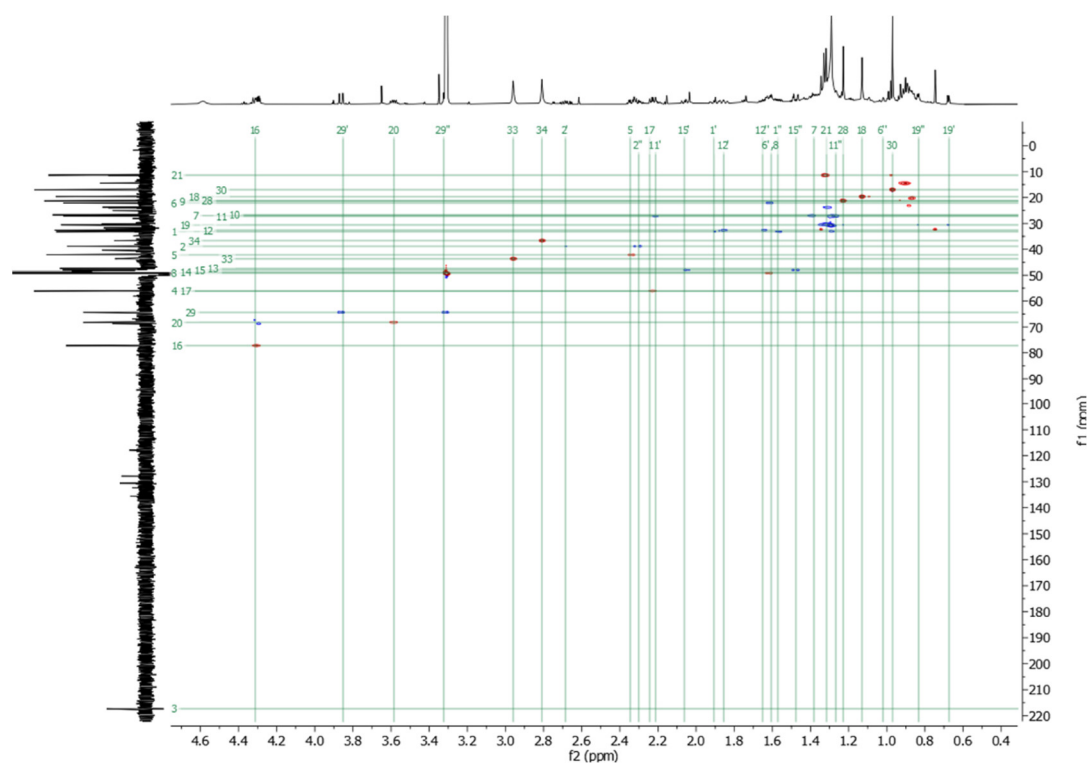

**Figure S78.**  $^1\text{H}/^{13}\text{C}$  HSQC spectrum of 29-hydroxy-cyclomikuranine-L (**11**) ( $\text{CD}_3\text{OD}$ , 600/150 MHz).

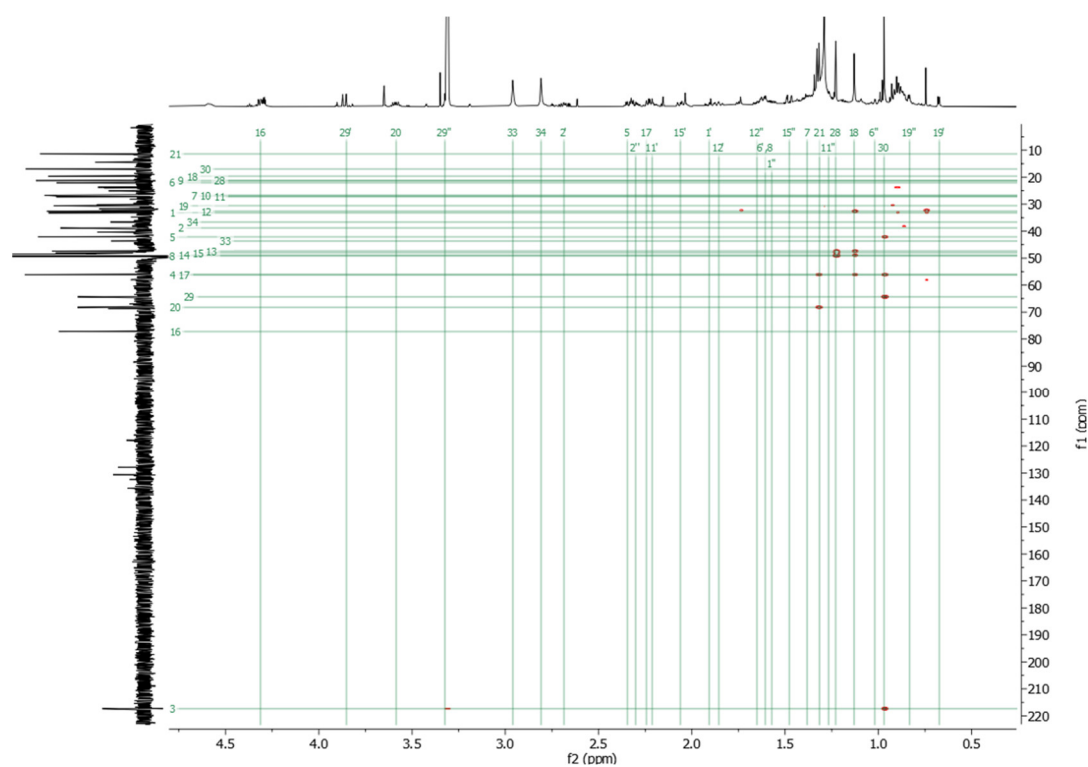

**Figure S79.**  $^1\text{H}/^{13}\text{C}$  HMBC spectrum of 29-hydroxy-cyclomikuranine-L (**11**) ( $\text{CD}_3\text{OD}$ , 600/150 MHz).

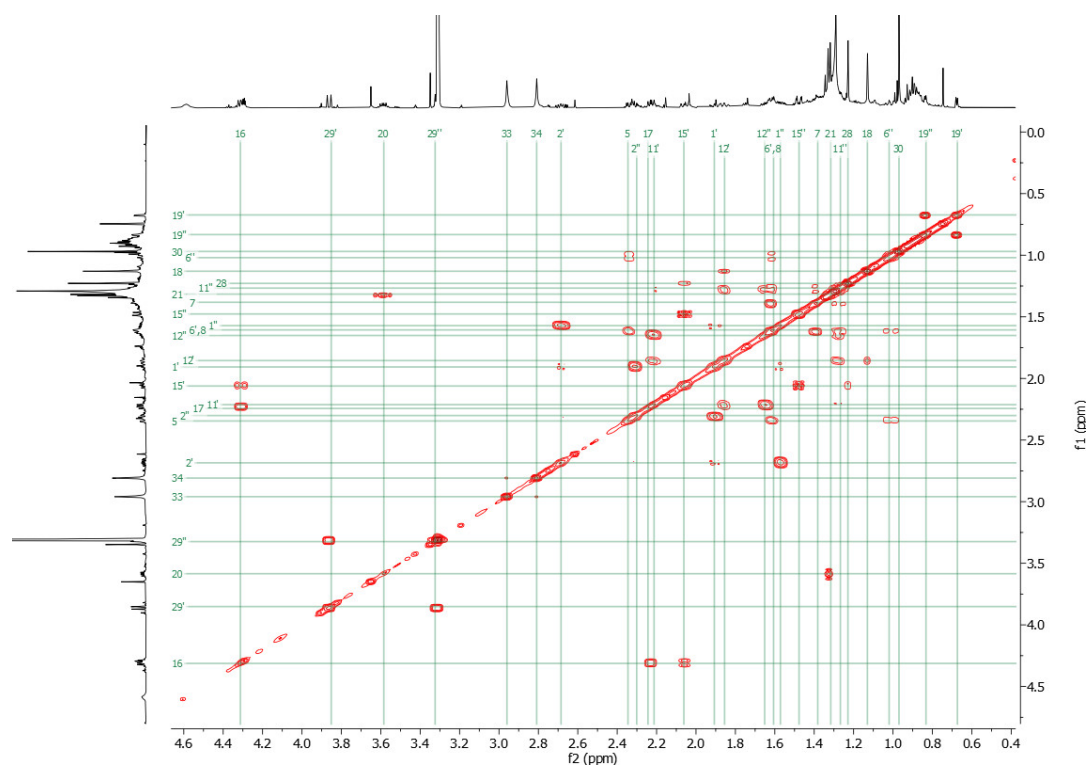

**Figure S80.**  $^1\text{H}/^1\text{H}$  COSY spectrum of 29-hydroxy-cyclomikuranine-L (**11**) ( $\text{CD}_3\text{OD}$ , 600 MHz).

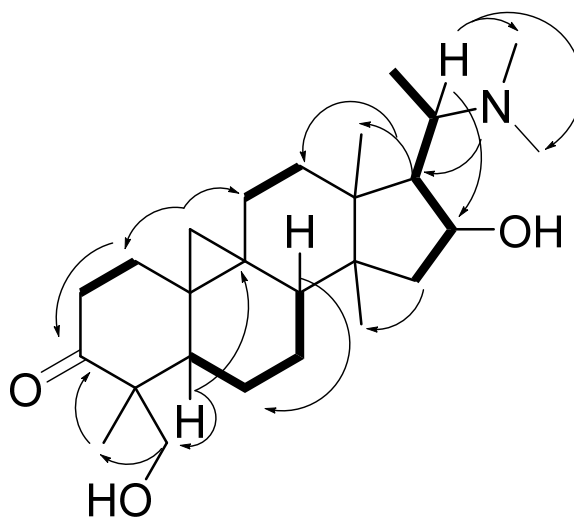

**Figure S81.** Key COSY (bold lines) and HMBC (arrows) correlations of 29-hydroxy-cyclomikuranine-L (**11**).

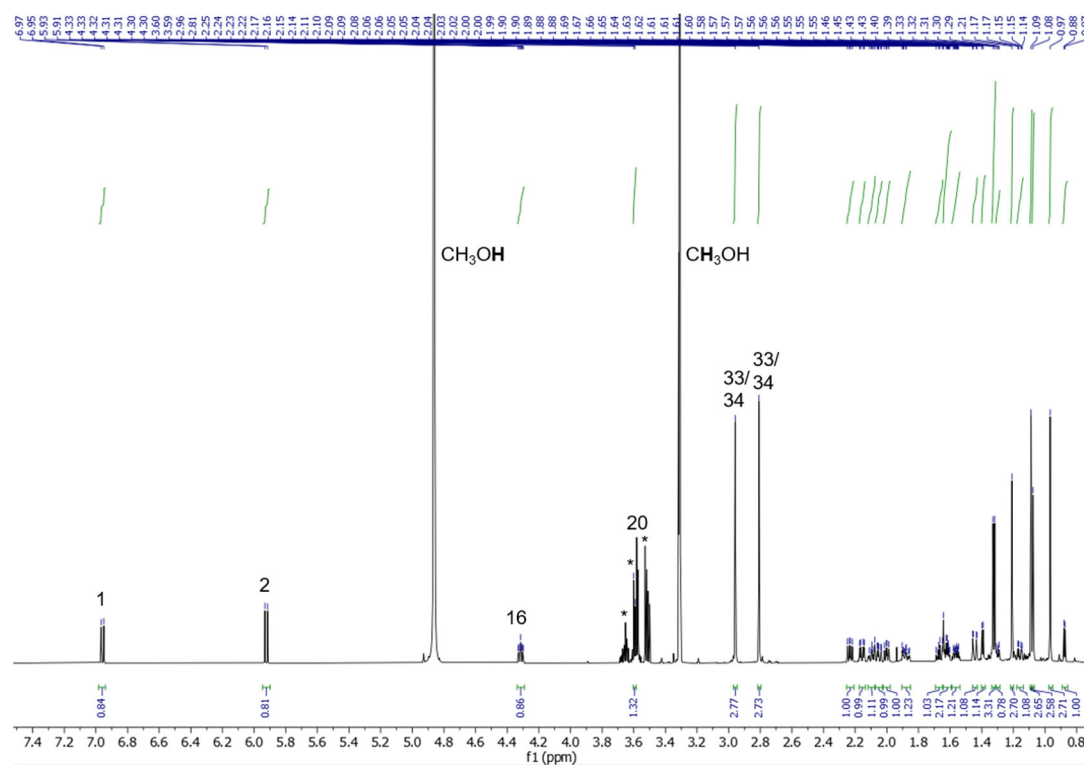

**Figure S82.**  $^1\text{H}$  NMR spectrum of  $N_6$ -dimethylcyclohexovirine (**12**) ( $\text{CD}_3\text{OD}$ , 600 MHz). The assignment of the signals between 0.8 and 2.3 ppm can be found in the enlarged Figure S83 (\*signals of 11.9% glycerol).

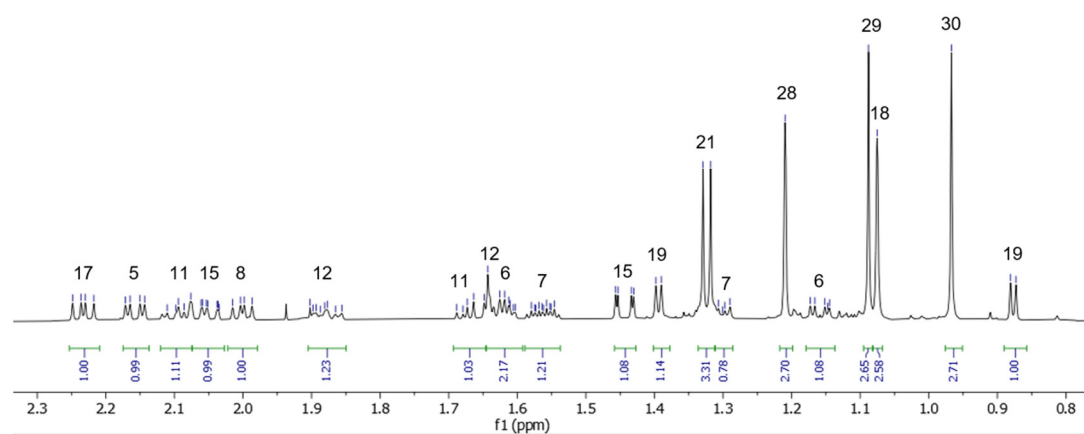

**Figure S83.** Detail of the  $^1\text{H}$  NMR spectrum of  $N_6$ -dimethylcyclohexovirine (**12**) ( $\text{CD}_3\text{OD}$ , 600 MHz).

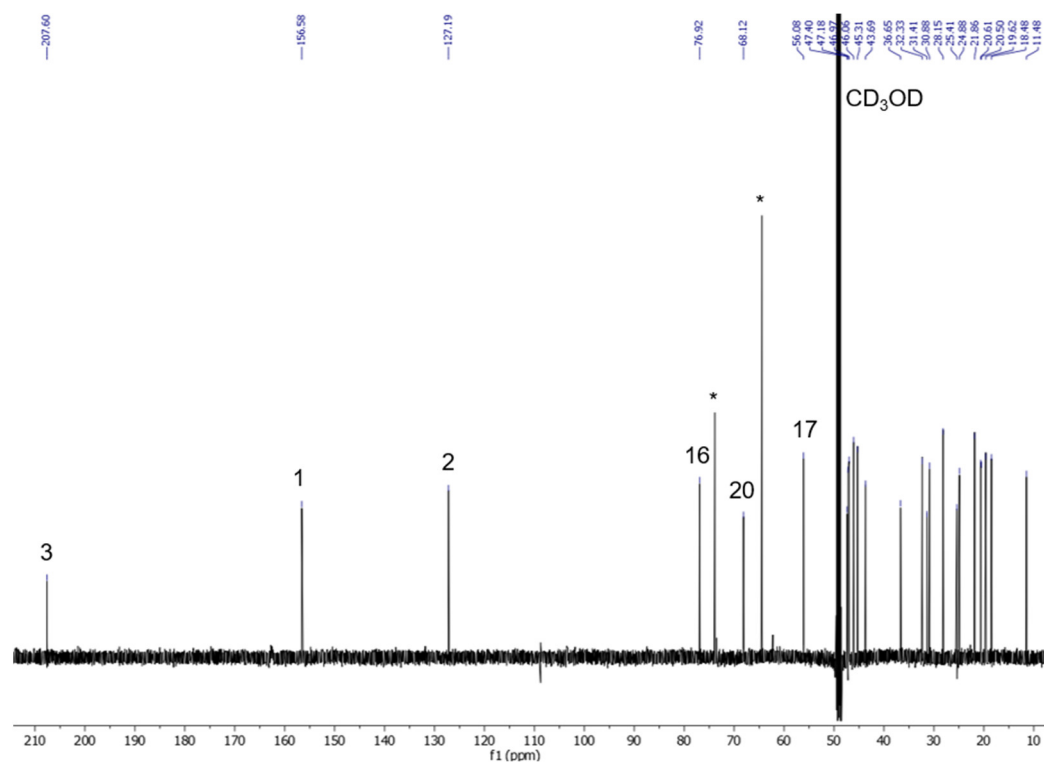

**Figure S84.**  $^{13}\text{C}$  NMR spectrum of Nb-dimethylcyclohexoviridine (**12**) ( $\text{CD}_3\text{OD}$ , 150 MHz). The assignment of the signals between 11 and 50 ppm can be found in the enlarged Figure S85 (\*signals of 11.9% glycerol).

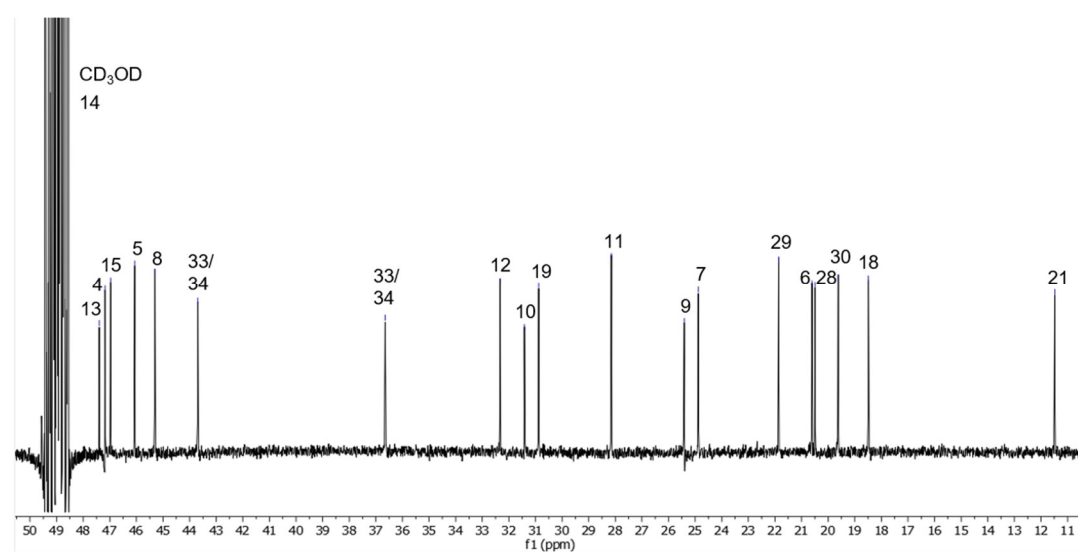

**Figure S85.** Detail of the  $^{13}\text{C}$  NMR spectrum of Nb-dimethylcyclohexoviridine (**12**) ( $\text{CD}_3\text{OD}$ , 150 MHz).

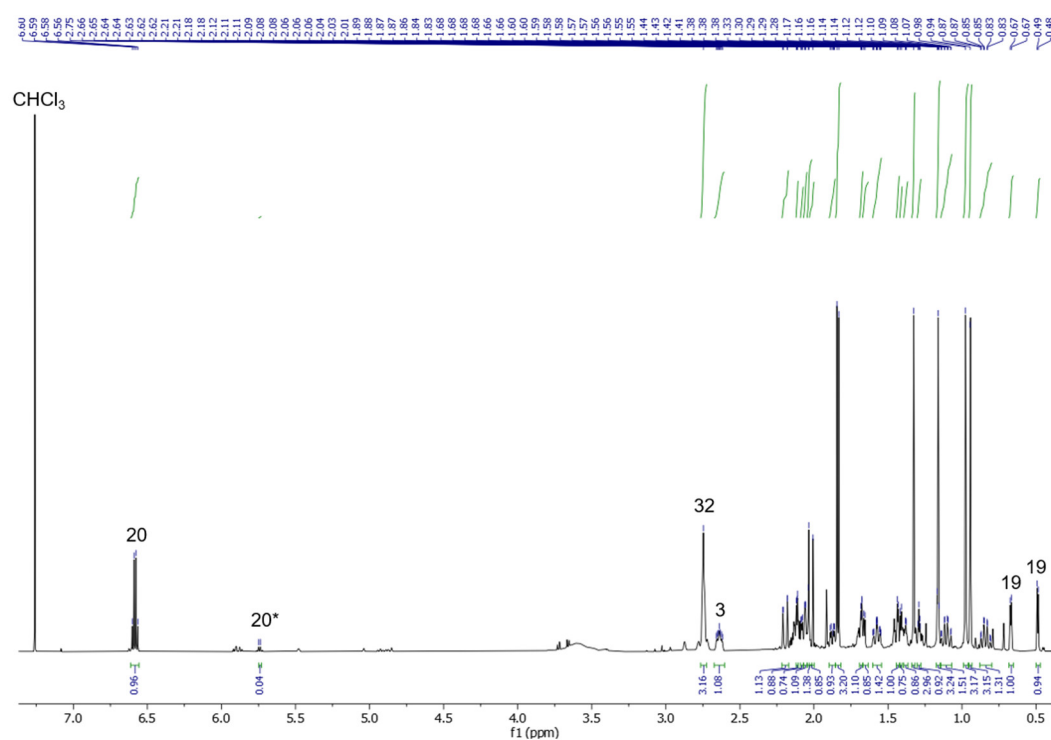

**Figure S86.**  $^1\text{H}$  NMR spectrum of (*E*)-cyclobuxophyllinine-M (**13**) and (*Z*)-cyclobuxophyllinine-M (**14**) ( $\text{CDCl}_3$ , 600 MHz). The assignment of the signals between 0.8 and 2.2 ppm can be found in the enlarged Figure S87 (\*signal of compound **14**).

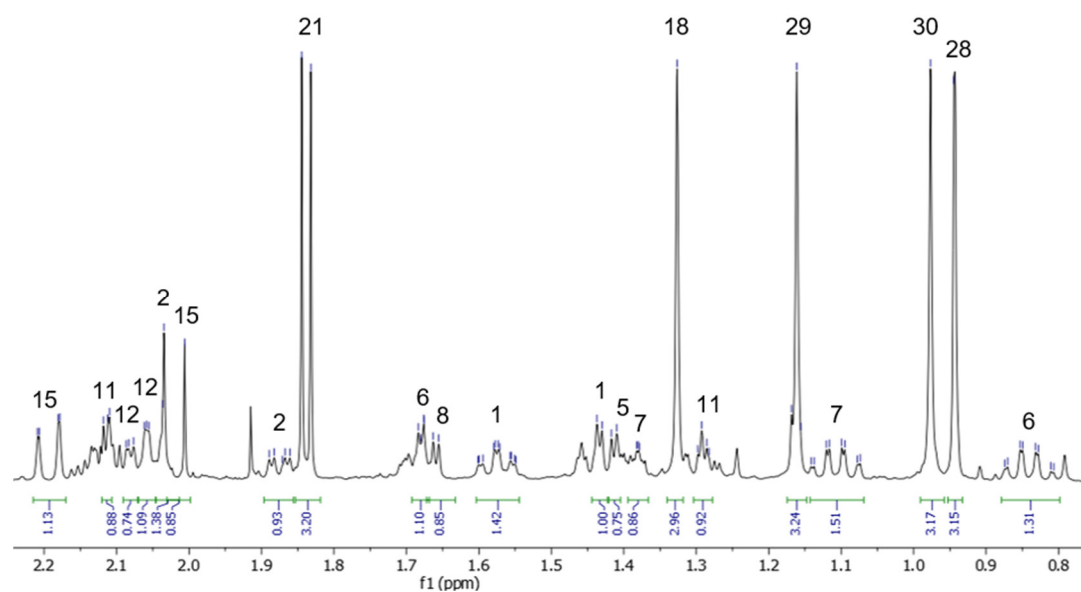

**Figure S87.** Detail of the  $^1\text{H}$  NMR spectrum of (*E*)-cyclobuxophyllinine-M (**13**) and (*Z*)-cyclobuxophyllinine-M (**14**) ( $\text{CDCl}_3$ , 600 MHz).

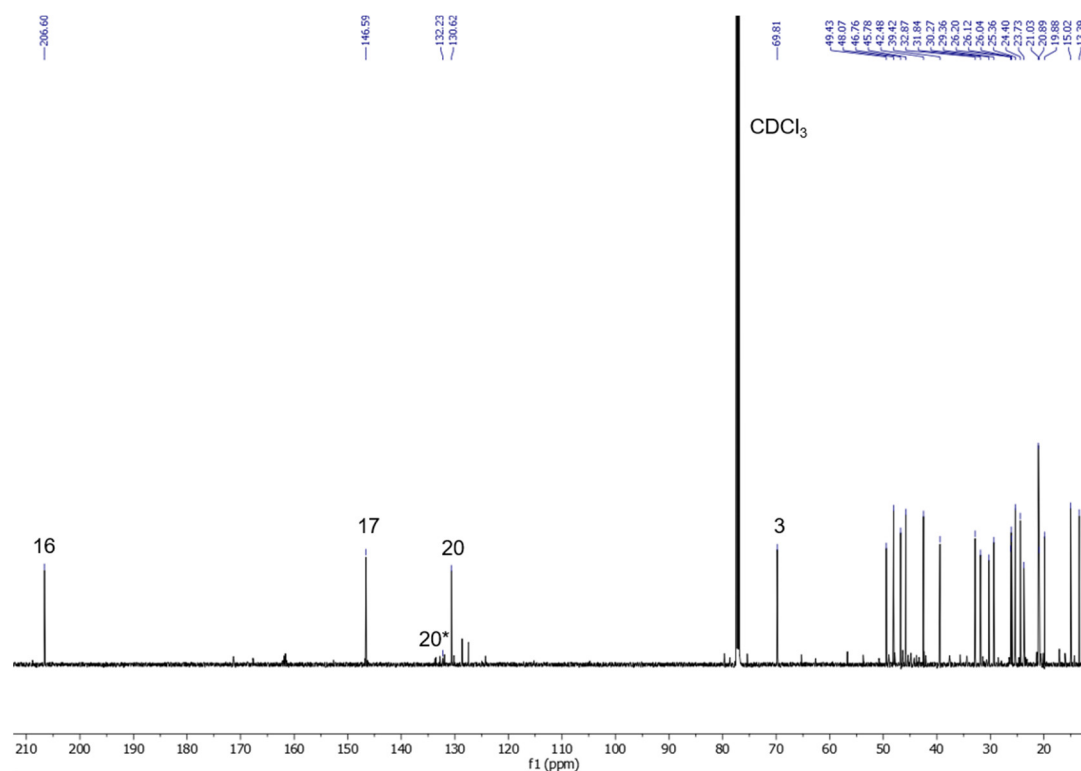

**Figure S88.** <sup>13</sup>C NMR spectrum of (*E*)-cyclobuxophyllinine-M (**13**) and (*Z*)-cyclobuxophyllinine-M (**14**) (CDCl<sub>3</sub>, 150 MHz). The assignment of the signals between 13 and 50 ppm can be found in the enlarged Figure S89 (\*signal of compound **14**).

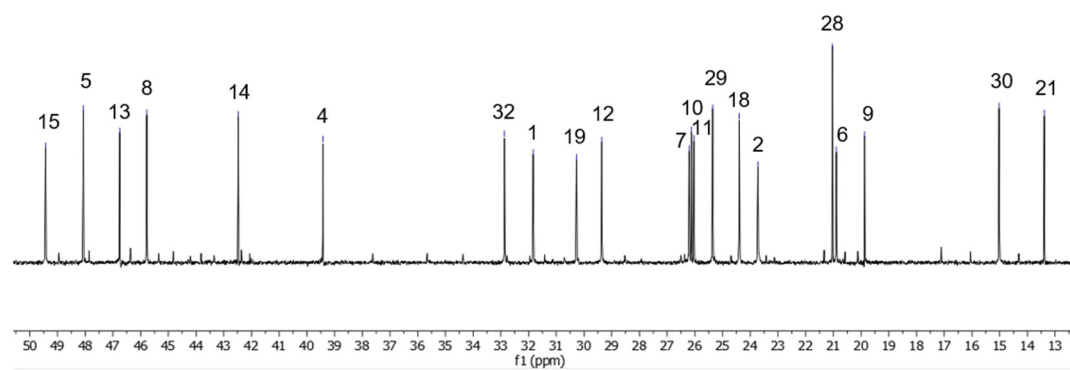

**Figure S89.** Detail of the <sup>13</sup>C NMR spectrum of (*E*)-cyclobuxophyllinine-M (**13**) and (*Z*)-cyclobuxophyllinine-M (**14**) (CDCl<sub>3</sub>, 150 MHz).

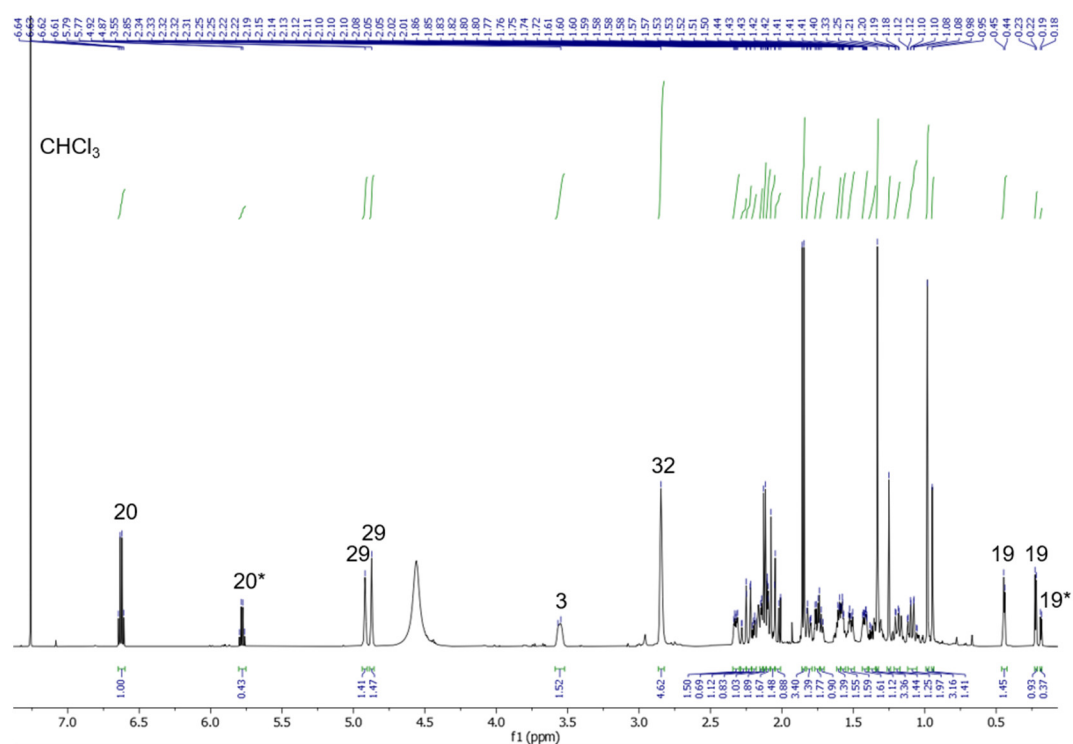

**Figure S90.**  $^1\text{H}$  NMR spectrum of (*E*)-cyclosuffrobuxinine-M (**15**) and (*Z*)-cyclosuffrobuxinine-M (**16**) ( $\text{CDCl}_3$ , 600 MHz). The assignment of the signals between 0.9 and 2.4 ppm can be found in the enlarged Figure S91 (\*signals of compound **16**).

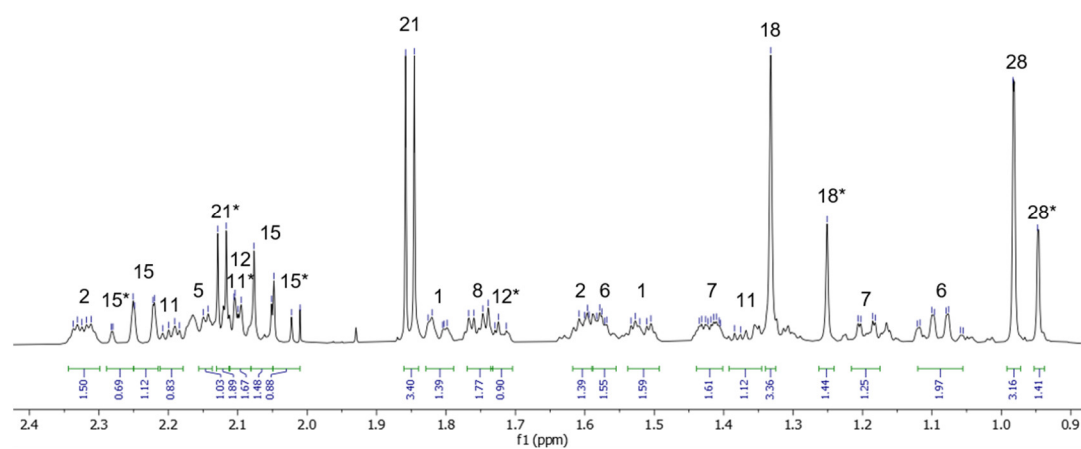

**Figure S91.** Detail of the  $^1\text{H}$  NMR spectrum of (*E*)-cyclosuffrobuxinine-M (**15**) and (*Z*)-cyclosuffrobuxinine-M (**16**) ( $\text{CDCl}_3$ , 600 MHz) (\*signals of compound **16**).



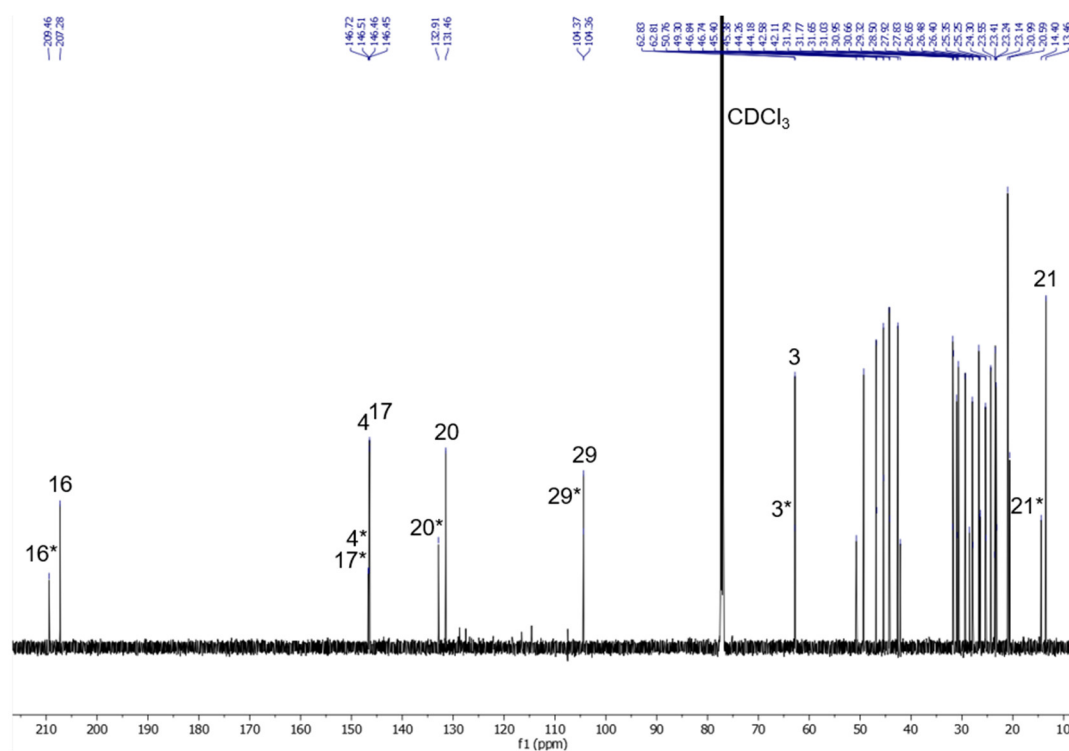

**Figure S92.**  $^{13}\text{C}$  NMR spectrum of (*E*)-cyclosuffrobuxinine-M (**15**) and (*Z*)-cyclosuffrobuxinine-M (**16**) ( $\text{CDCl}_3$ , 150 MHz). The assignment of the signals between 20 and 52 ppm can be found in the enlarged Figure S93 (\*signals of compound **16**).

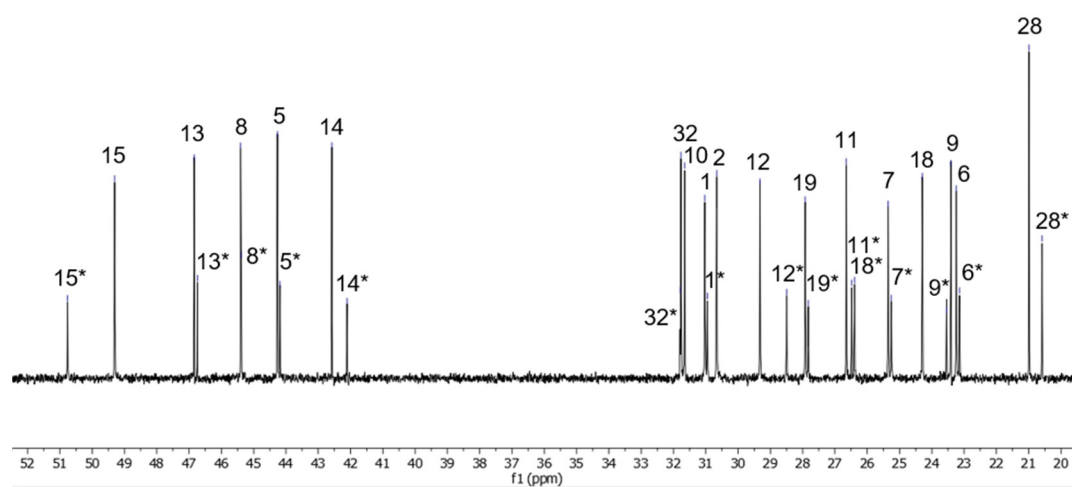

**Figure S93.** Detail of the  $^{13}\text{C}$  NMR spectrum of (*E*)-cyclosuffrobuxinine-M (**15**) and (*Z*)-cyclosuffrobuxinine-M (**16**) ( $\text{CDCl}_3$ , 150 MHz) (\*signals of compound **16**).

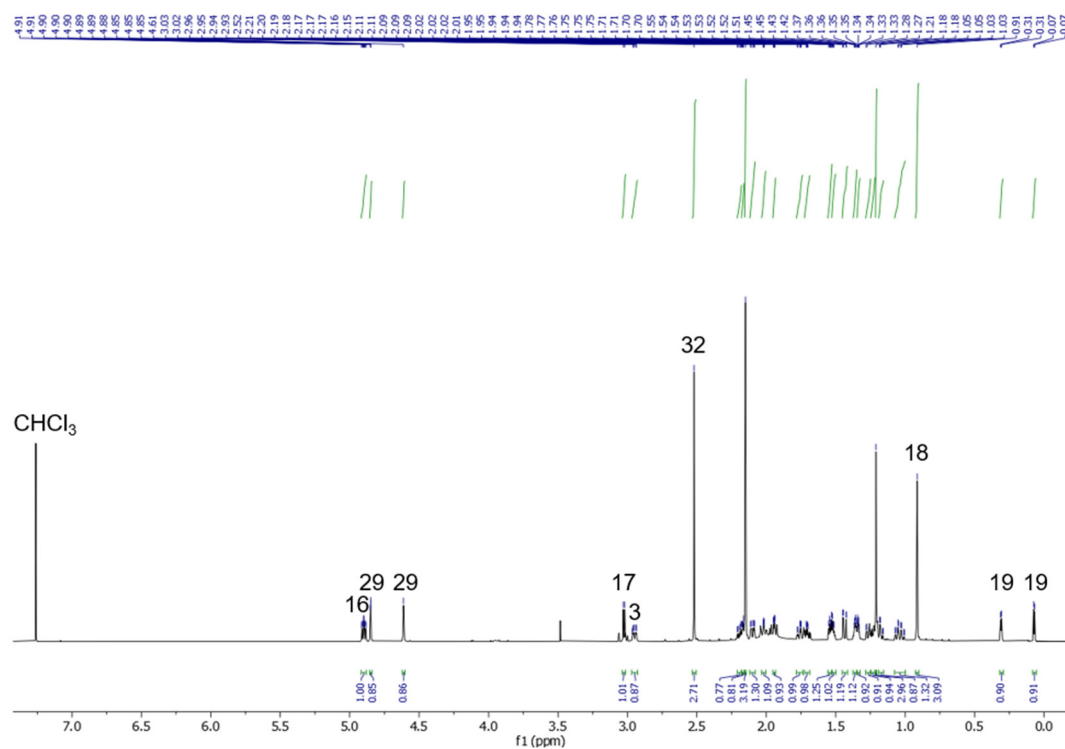

**Figure S94.**  $^1\text{H}$  NMR spectrum of Cyclomicrobuxinine (**17**) ( $\text{CDCl}_3$ , 600 MHz). The assignment of the signals between 1.0 and 2.2 ppm can be found in the enlarged Figure S95.

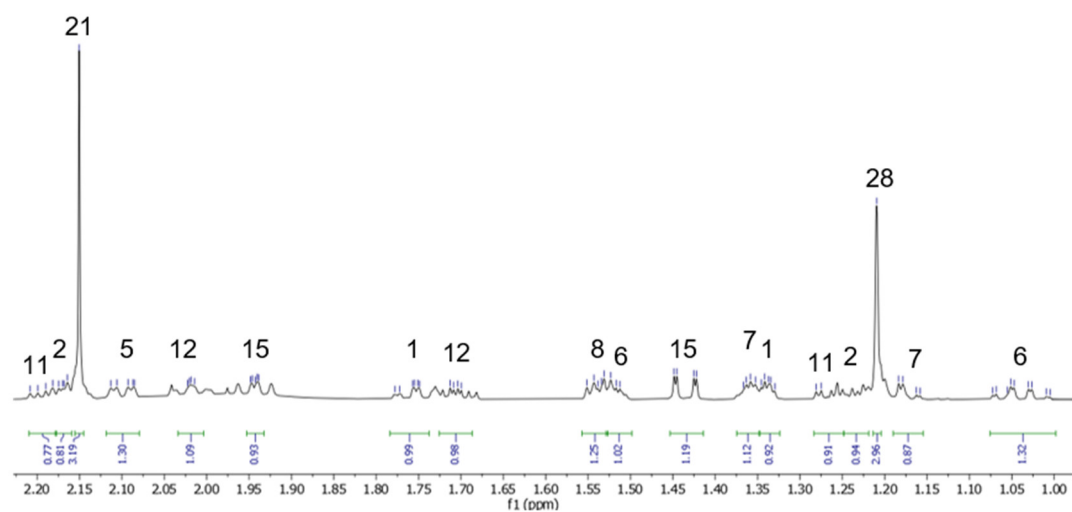

**Figure S95.** Detail of the  $^1\text{H}$  NMR spectrum of Cyclomicrobuxinine (**17**) ( $\text{CDCl}_3$ , 600 MHz).

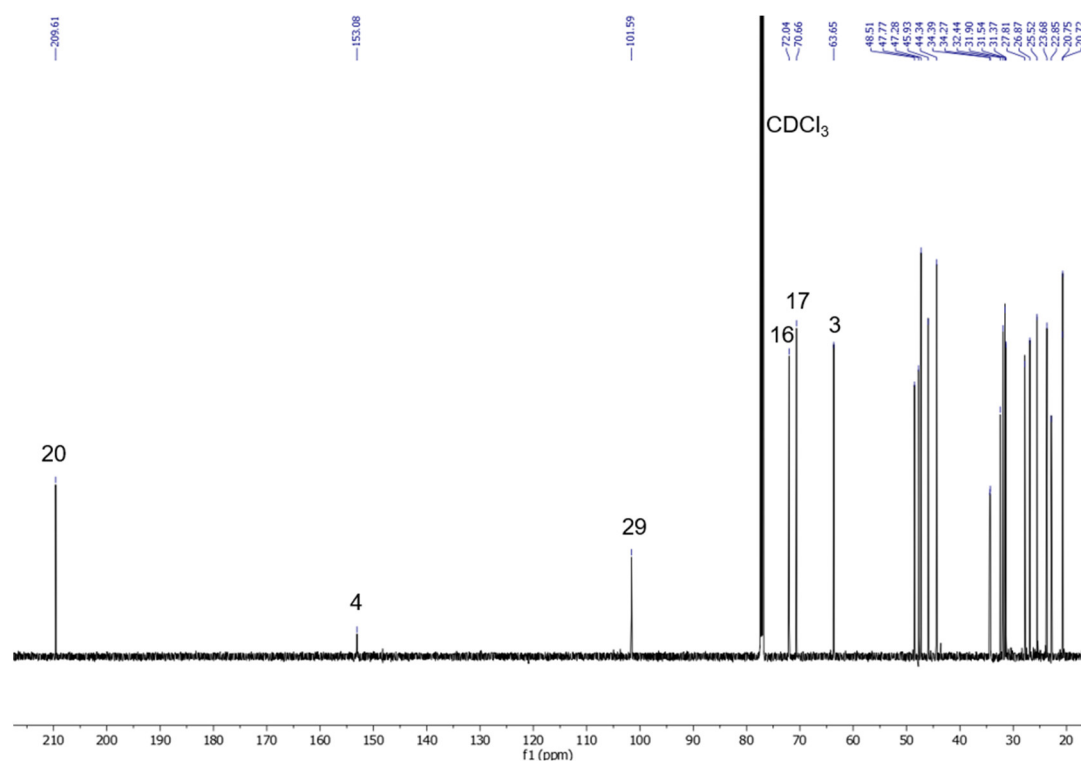

**Figure S96.** <sup>13</sup>C NMR spectrum of Cyclomicrobuxinine (**17**) (CDCl<sub>3</sub>, 150 MHz). The assignment of the signals between 20 and 49 ppm can be found in the enlarged Figure S97.

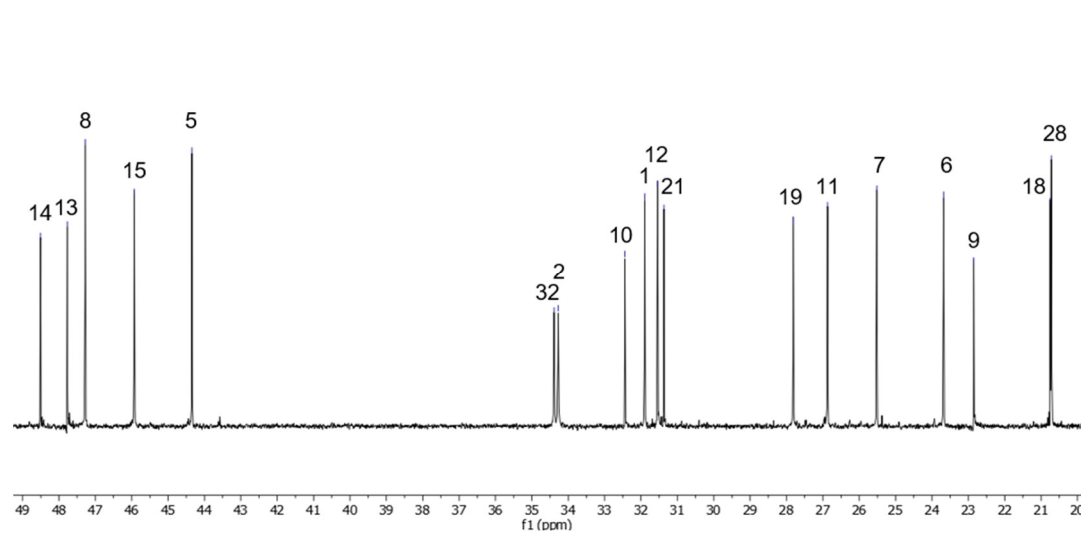

**Figure S97.** Detail of the <sup>13</sup>C NMR spectrum of Cyclomicrobuxinine (**17**) (CDCl<sub>3</sub>, 150 MHz).

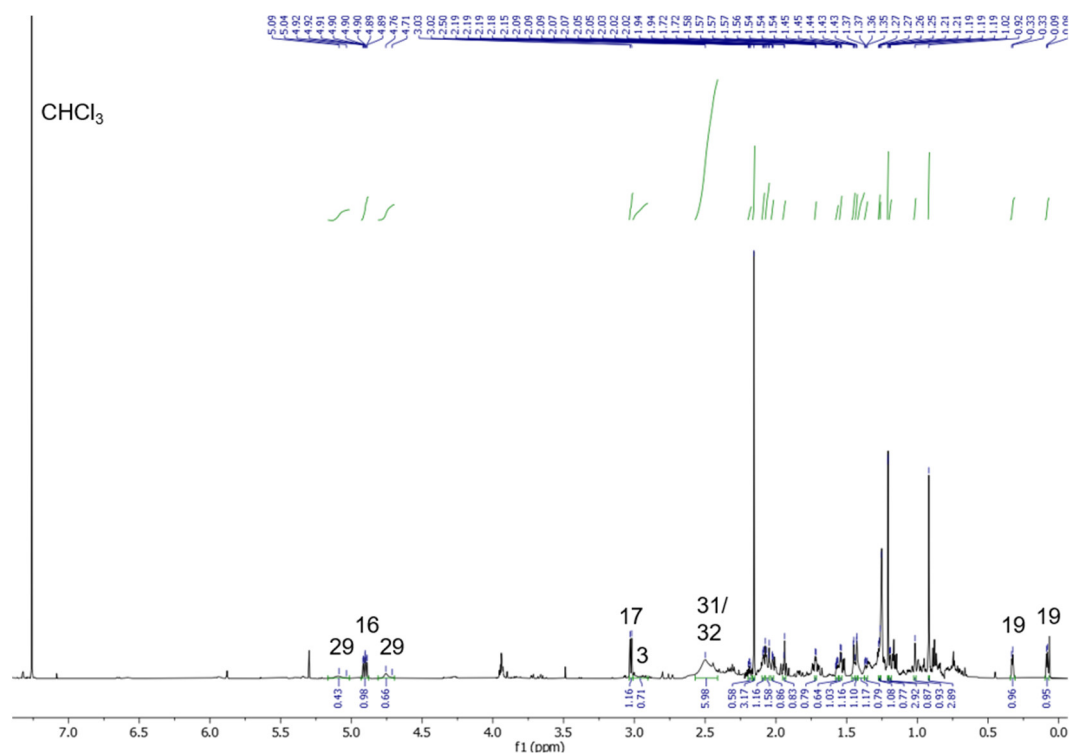

**Figure S98.**  $^1\text{H}$  NMR spectrum of Cyclomicrobuxine (**18**) ( $\text{CDCl}_3$ , 600 MHz). The assignment of the signals between 0.9 and 2.2 ppm can be found in the enlarged Figure S99.

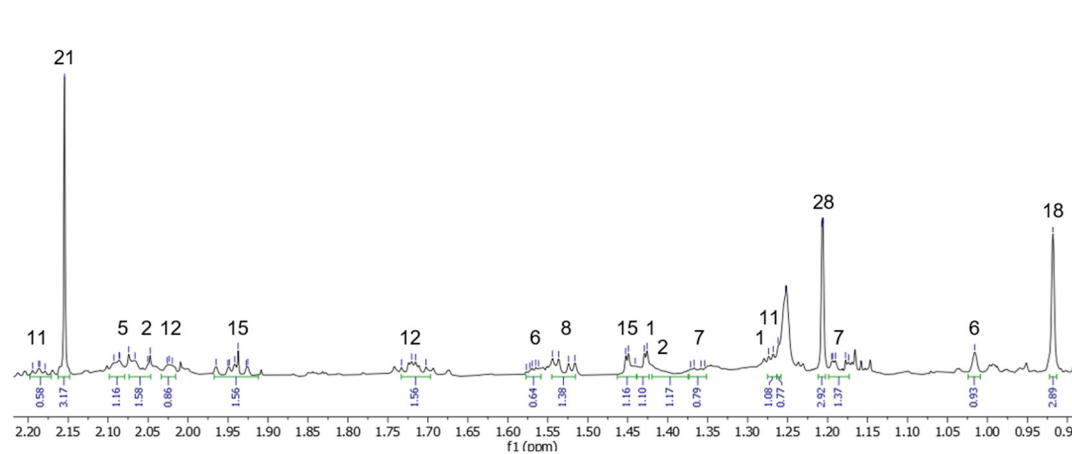

**Figure S99.** Detail of the  $^1\text{H}$  NMR spectrum of Cyclomicrobuxine (**18**) ( $\text{CDCl}_3$ , 600 MHz).

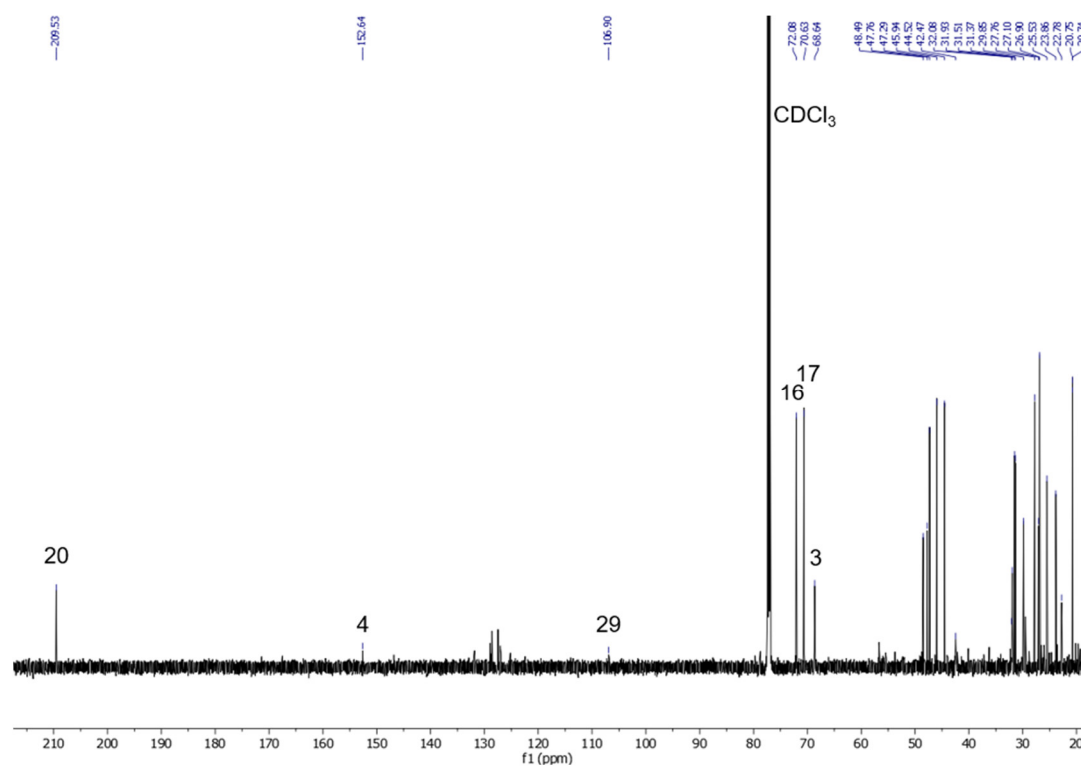

**Figure S100.**  $^{13}\text{C}$  NMR spectrum of Cyclomicrobuxine (**18**) ( $\text{CDCl}_3$ , 150 MHz). The assignment of the signals between 20.5 and 49 ppm can be found in the enlarged Figure S101.

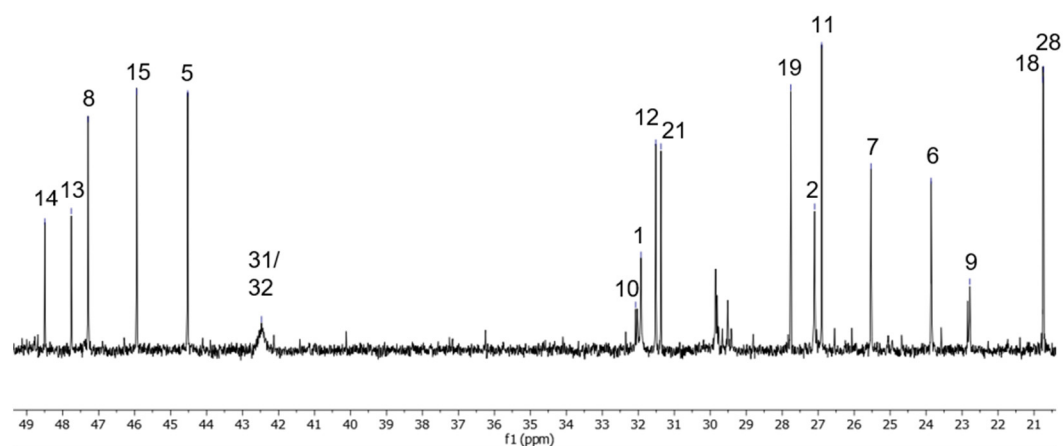

**Figure S101.** Detail of the  $^{13}\text{C}$  NMR spectrum of Cyclomicrobuxine (**18**) ( $\text{CDCl}_3$ , 150 MHz).

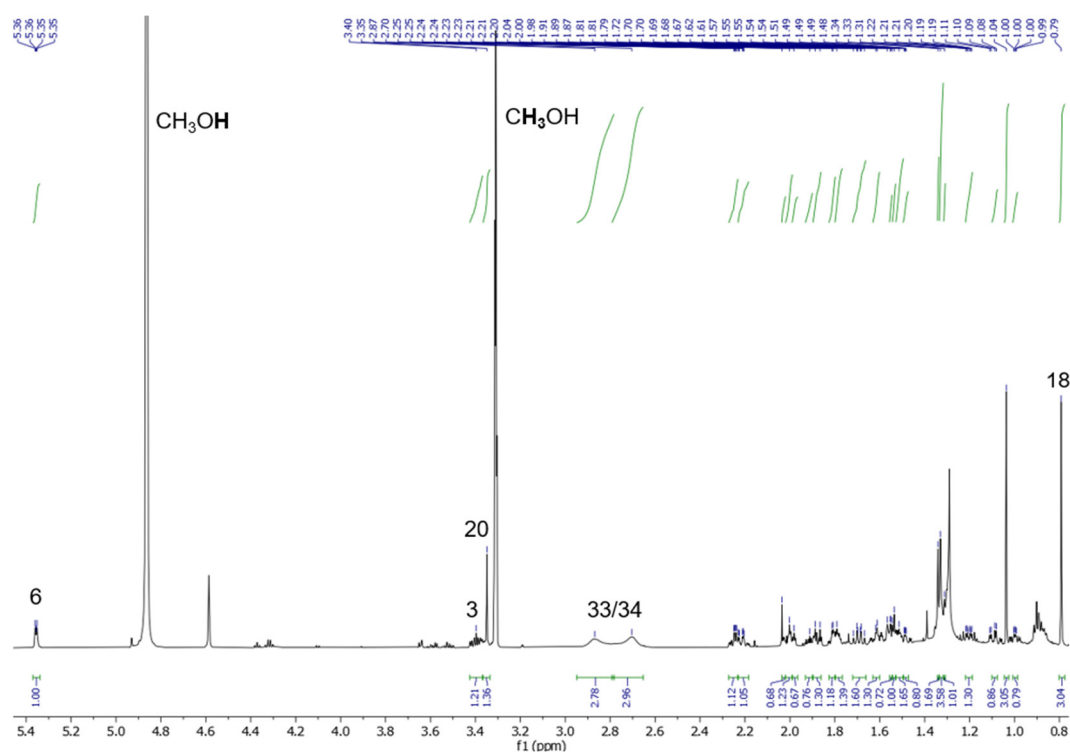

**Figure S102.**  $^1\text{H}$  NMR spectrum of Irehine (**19**) ( $\text{CD}_3\text{OD}$ , 600 MHz). The assignment of the signals between 0.95 and 2.3 ppm can be found in the enlarged Figure S103.

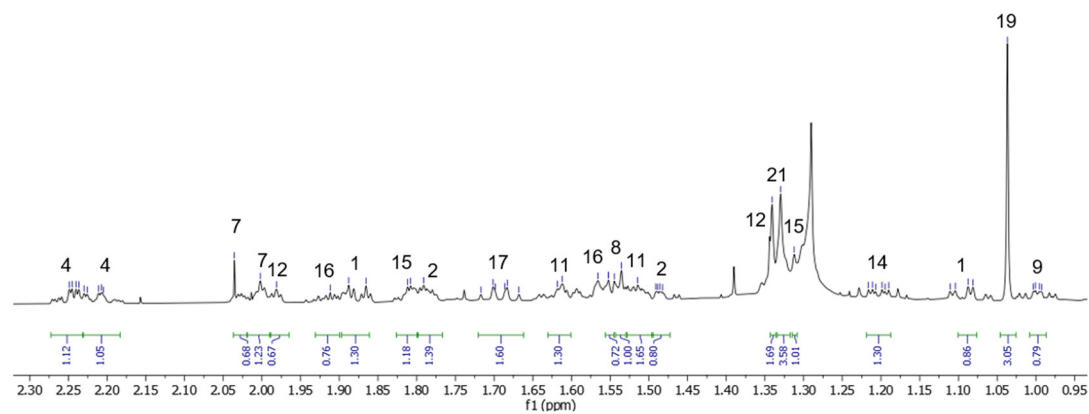

**Figure S103.** Detail of the  $^1\text{H}$  NMR spectrum of Irehine (**19**) ( $\text{CD}_3\text{OD}$ , 600 MHz).

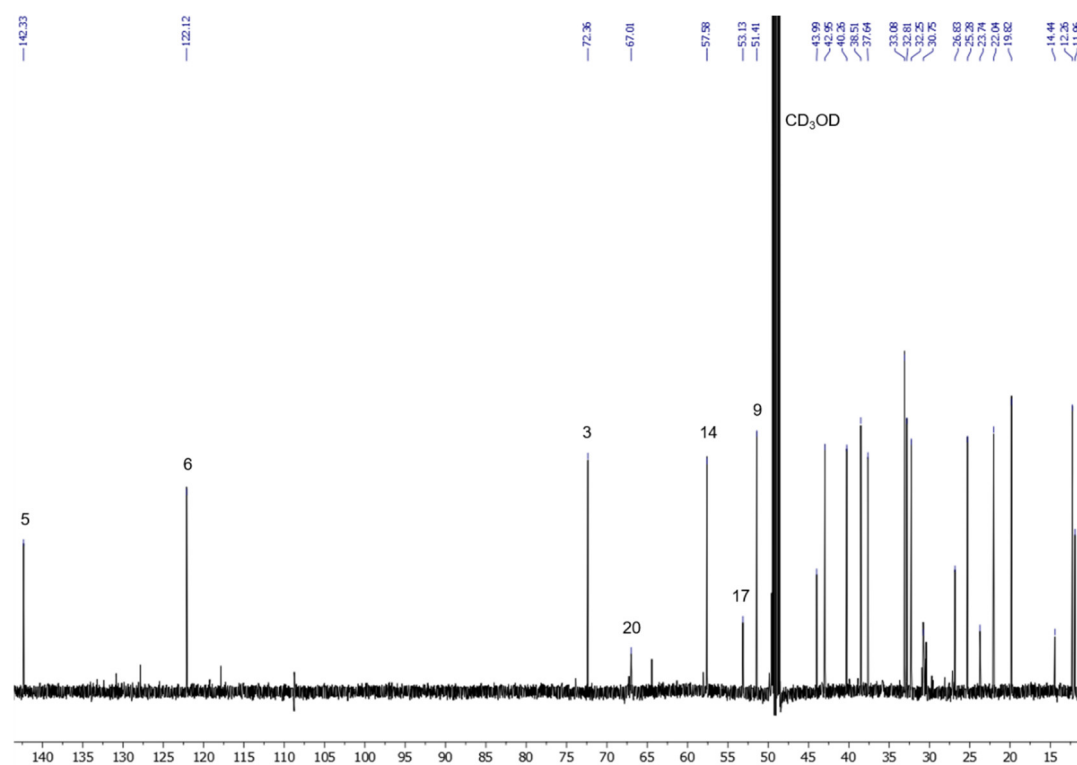

**Figure S104.**  $^{13}\text{C}$  NMR spectrum of Irehine (**19**) ( $\text{CD}_3\text{OD}$ , 150 MHz). The assignment of the signals between 11 and 44 ppm can be found in the enlarged Figure S105.

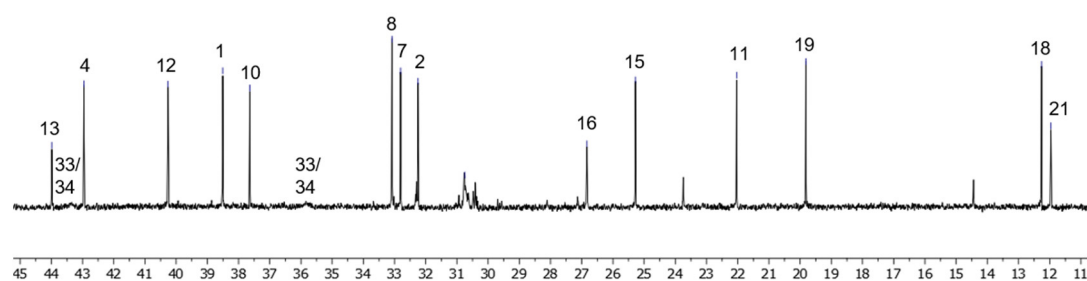

**Figure S105.** Detail of the  $^{13}\text{C}$  NMR spectrum of Irehine (**19**) ( $\text{CD}_3\text{OD}$ , 150 MHz).

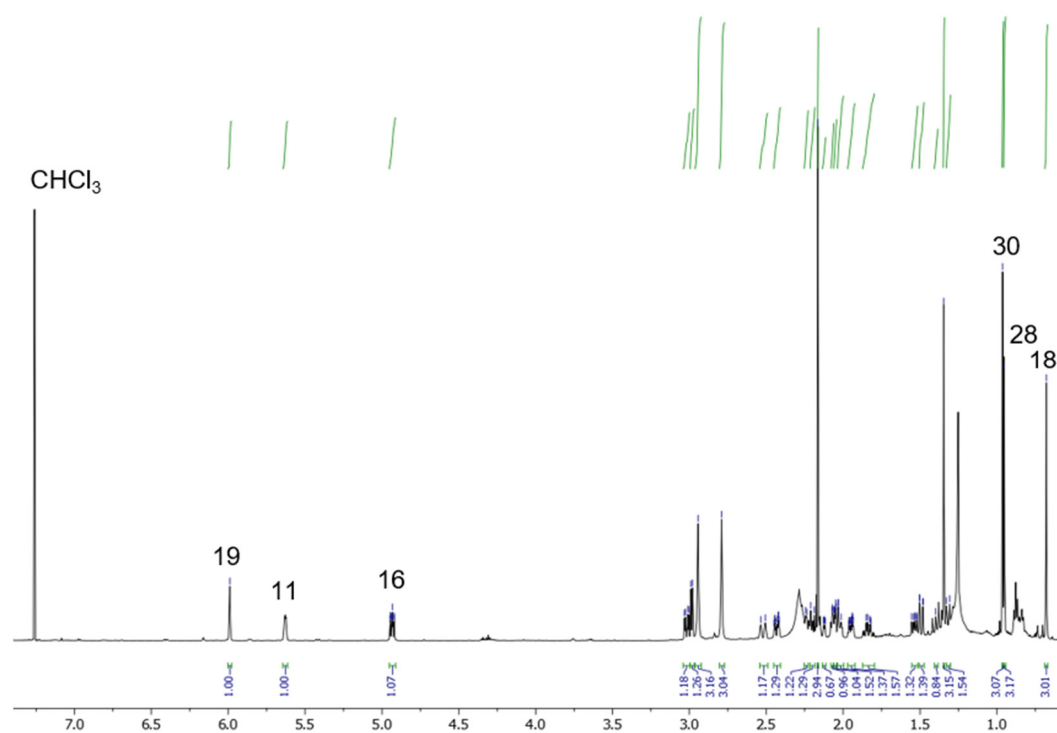

**Figure S106.**  $^1\text{H}$  NMR spectrum of 16- $\alpha$ -hydroxybuxaminone (**20**) ( $\text{CDCl}_3$ , 600 MHz). The assignment of the signals between 1.3 and 3.0 ppm can be found in the enlarged Figure S107.

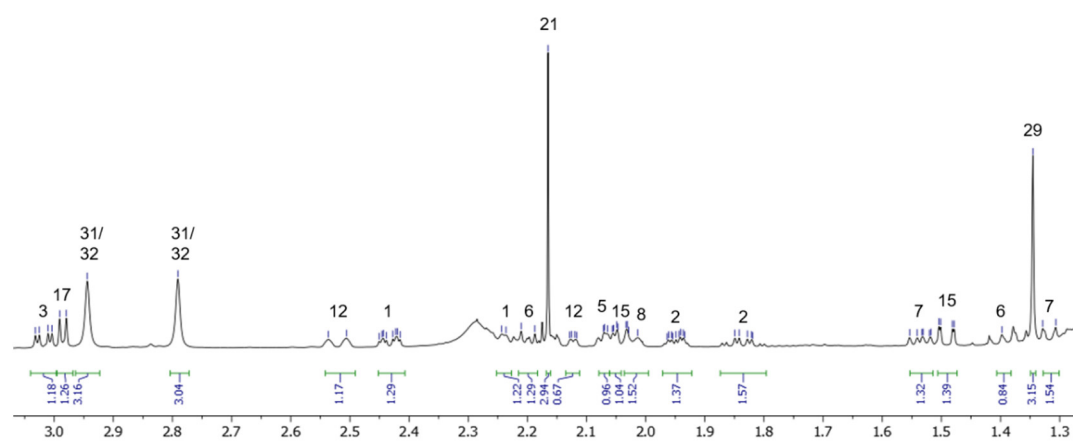

**Figure S107.** Detail of the  $^1\text{H}$  NMR spectrum of 16- $\alpha$ -hydroxybuxaminone (**20**) ( $\text{CDCl}_3$ , 600 MHz).



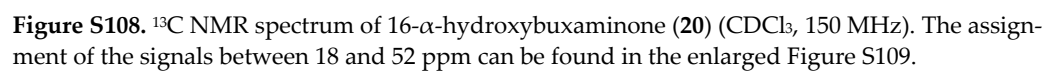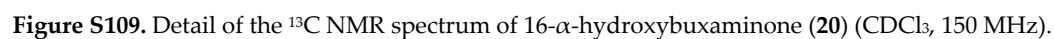

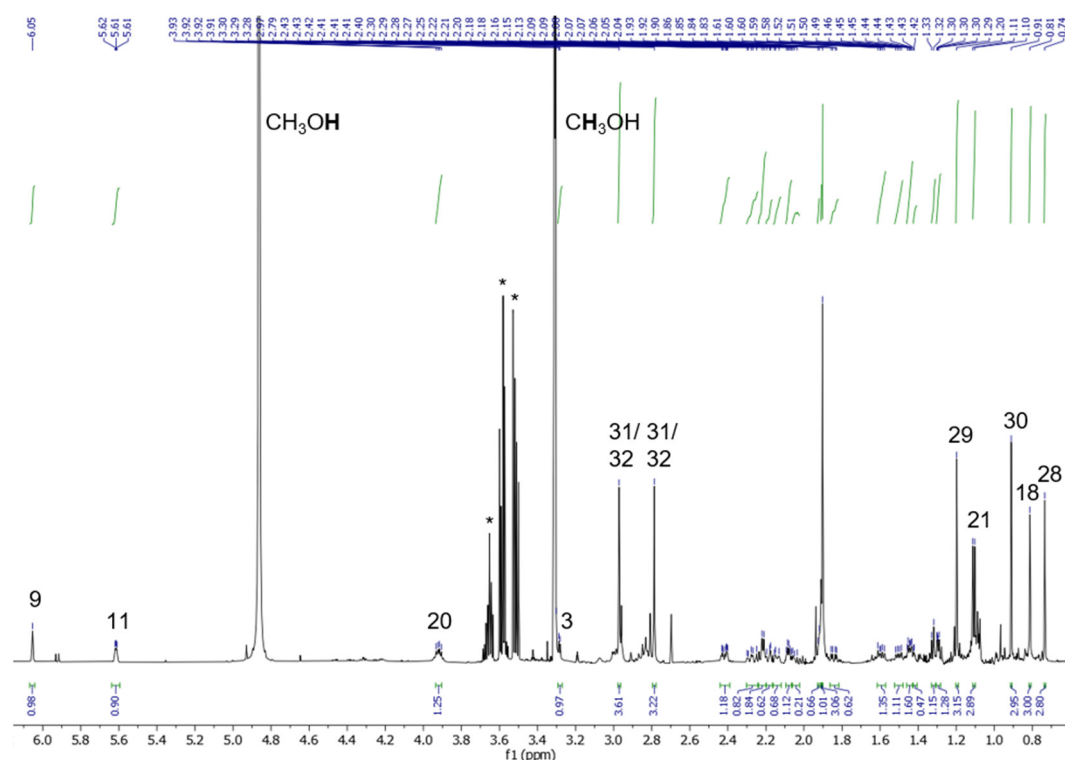

**Figure S110.**  $^1\text{H}$  NMR spectrum of  $\text{N}_{20}$ -acetylbuxamine-E (**21**) ( $\text{CD}_3\text{OD}$ , 600 MHz). The assignment of the signals between 1.25 and 2.45 ppm can be found in the enlarged Figure S111 (\*signals of 36.4% glycerol).

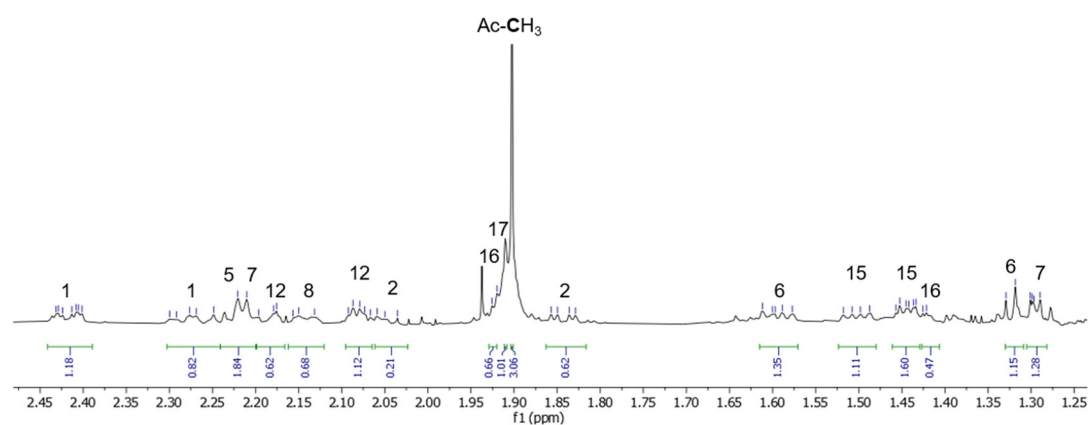

**Figure S111.** Detail of the  $^1\text{H}$  NMR spectrum of  $\text{N}_{20}$ -acetylbuxamine-E (**21**) ( $\text{CD}_3\text{OD}$ , 600 MHz).

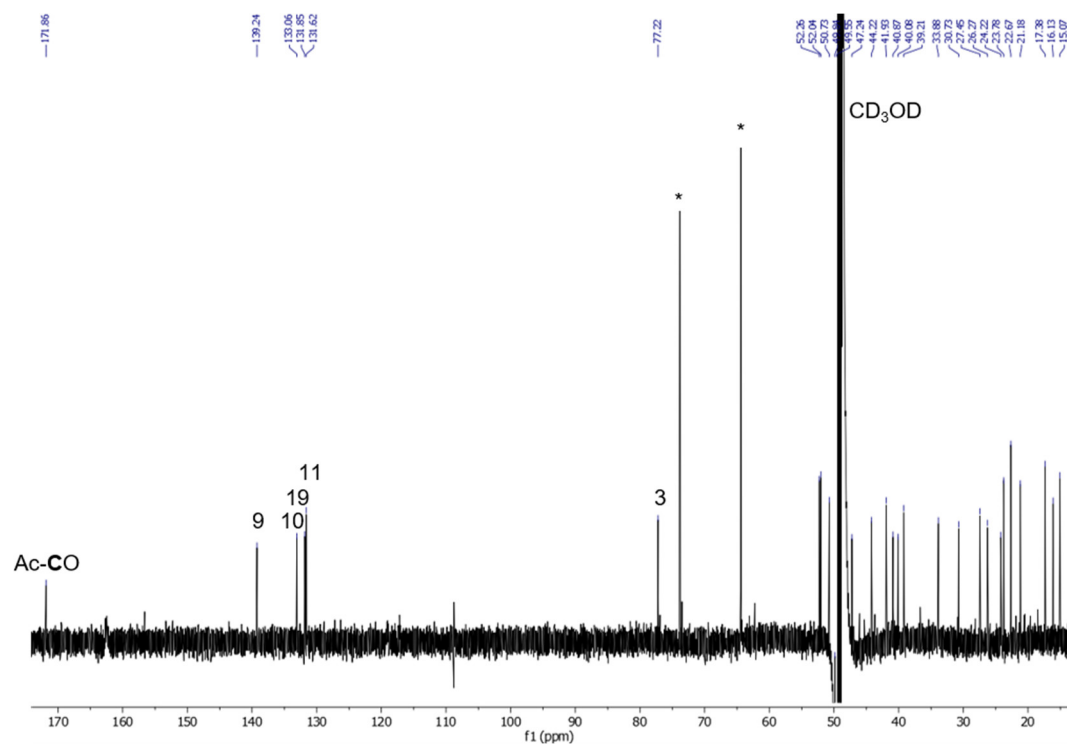

**Figure S112.**  $^{13}\text{C}$  NMR spectrum of  $\text{N}_{20}$ -acetylbuxamine-E (**21**) ( $\text{CD}_3\text{OD}$ , 150 MHz). The assignment of the signals between 15 and 53 ppm can be found in the enlarged Figure S113 (\*signals of 36.4% glycerol).

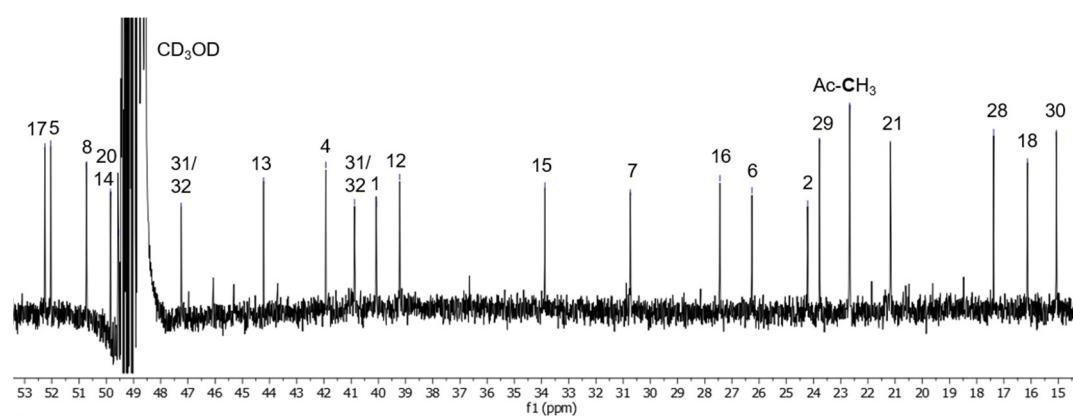

**Figure S113.** Detail of the  $^{13}\text{C}$  NMR spectrum of  $\text{N}_{20}$ -acetylbuxamine-E (**21**) ( $\text{CD}_3\text{OD}$ , 150 MHz).

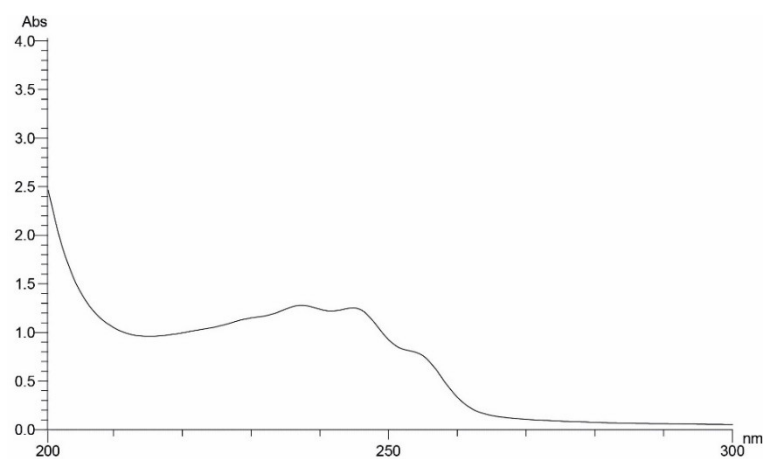

**Figure S114.** UV spectrum of N-benzoyl-O-acetylboxodienine-E (**22**) ( $c = 0.02$  mg/mL) in methanol;  $\lambda_{\text{max}}$  (log  $\epsilon$ ): 237 nm (4.54), 245 nm (4.53), 253 nm (4.35).

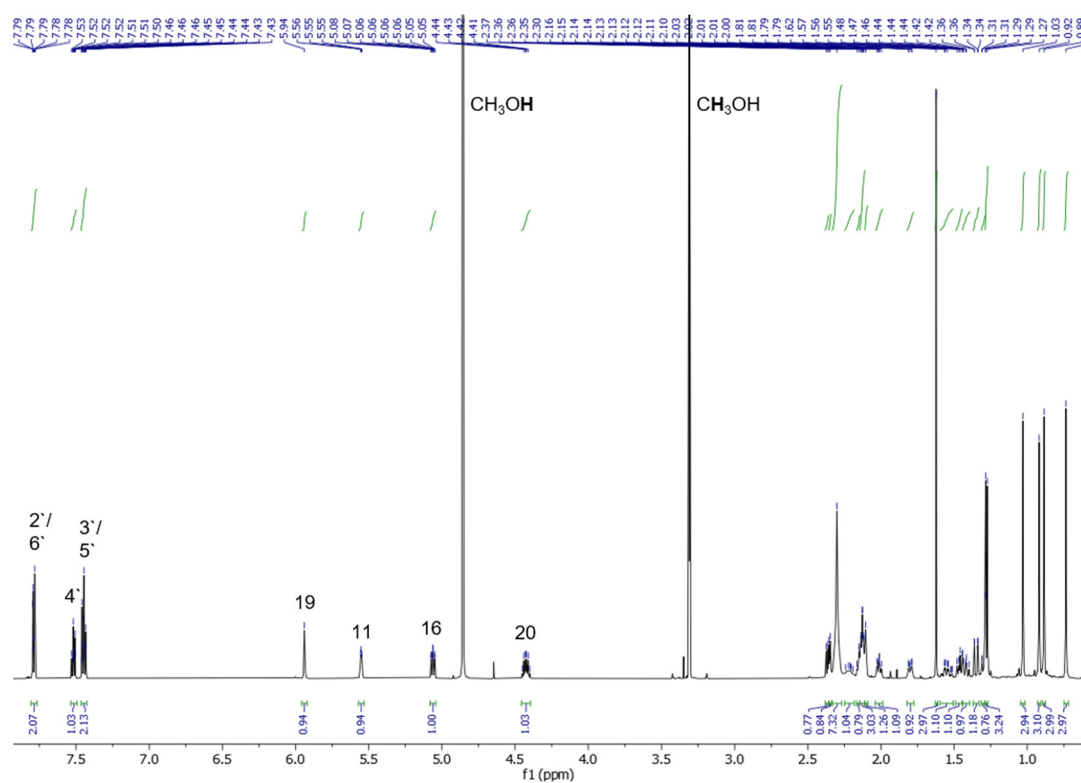

**Figure S115.**  $^1\text{H}$  NMR spectrum of N-benzoyl-O-acetylboxodienine-E (**22**) ( $\text{CD}_3\text{OD}$ , 600 MHz). The assignment of the signals between 0.6 and 2.5 ppm can be found in the enlarged Figure S116.

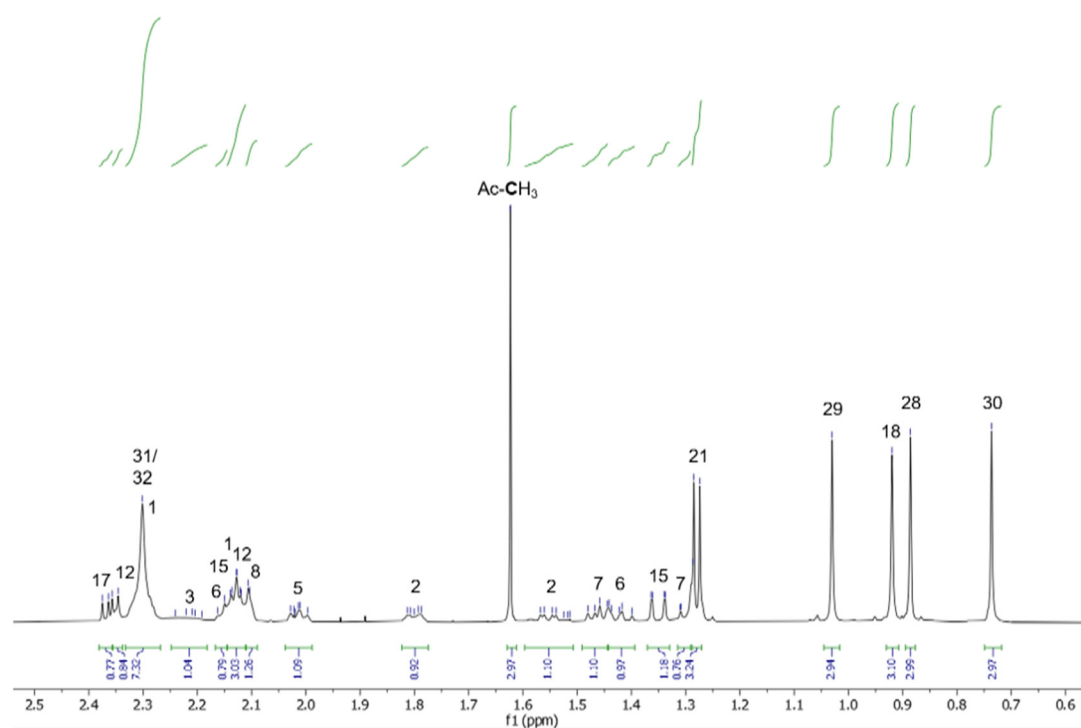

**Figure S116.** Detail of the  $^1\text{H}$  NMR spectrum of N-benzoyl-O-acetylbuxodienine-E (22) ( $\text{CD}_3\text{OD}$ , 600 MHz).

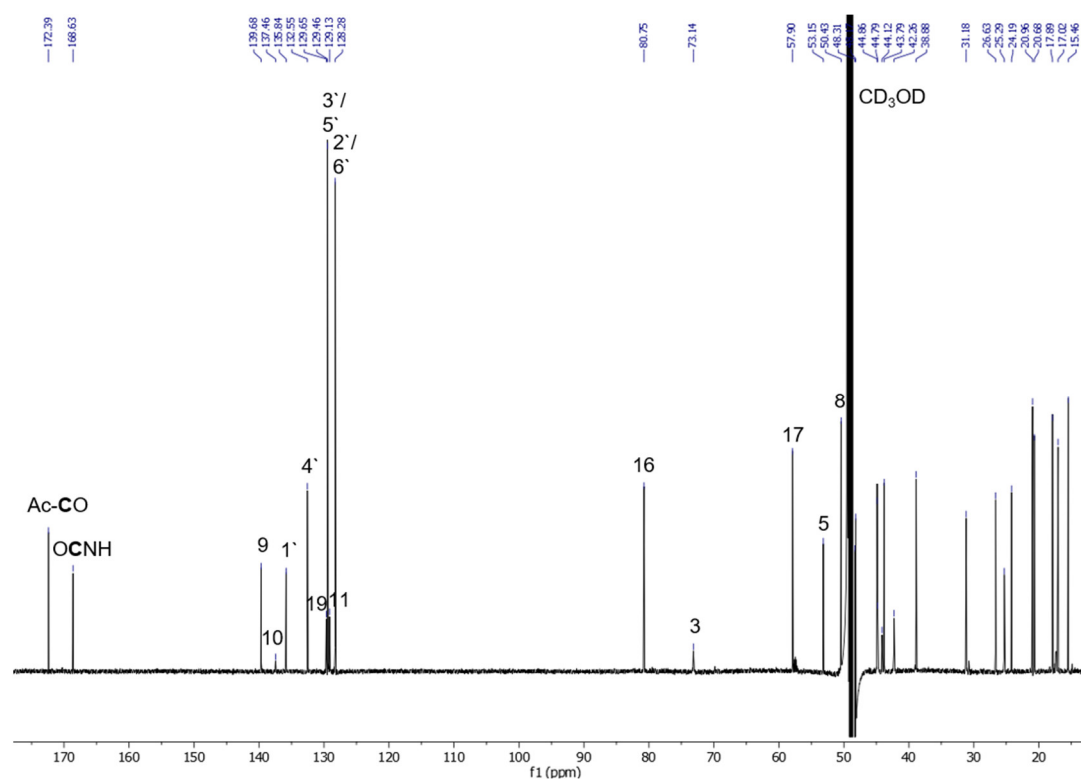

**Figure S117.**  $^{13}\text{C}$  NMR spectrum of N-benzoyl-O-acetylbuxodienine-E (22) ( $\text{CD}_3\text{OD}$ , 150 MHz). The assignment of the signals between 15 and 49 ppm can be found in the enlarged Figure S118.

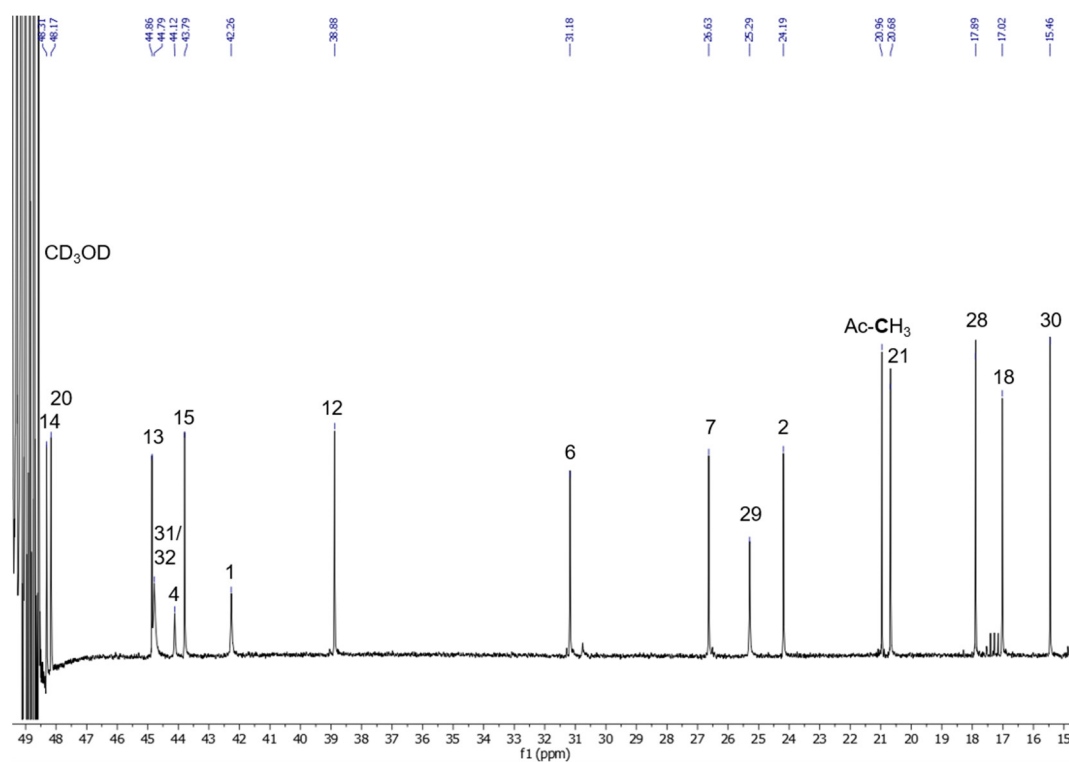

**Figure S118.** Detail of the  $^{13}\text{C}$  NMR spectrum of N-benzoyl-O-acetylbuxodienine-E (22) ( $\text{CD}_3\text{OD}$ , 150 MHz).

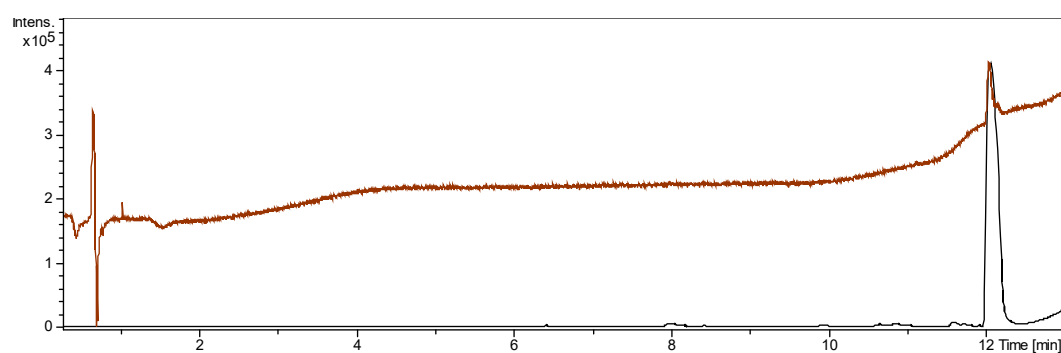

**Figure S119.** UHPLC/+ESI-QqTOF-MS/MS chromatogram of N-benzoyl-O-acetylbuxadine-E (23). Base peak chromatogram 200.0000-1000.0000 +All MS (black); UV-Chromatogram, 200-400 nm (red).

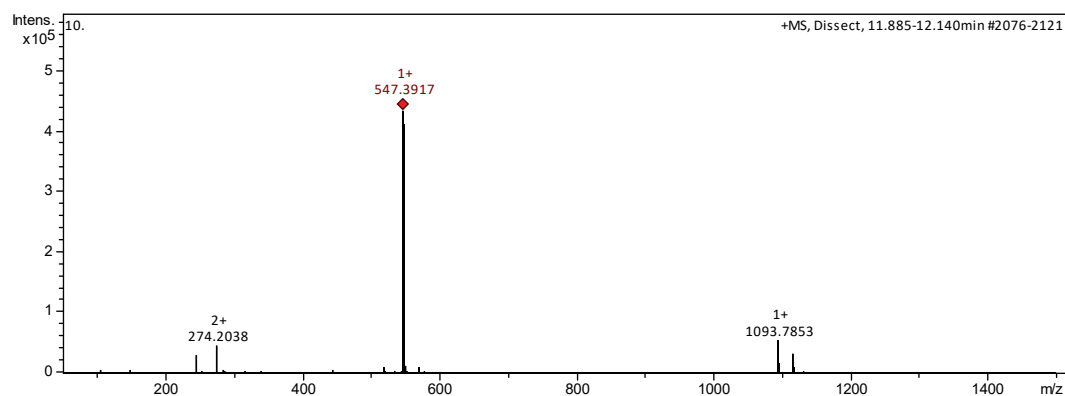

**Figure S120.** +ESI-QqTOF MS spectrum of N-benzoyl-O-acetylbuxadine-E (23);  $m/z$  274.2038  $[M+2H]^{2+}$ , 547.3917  $[M+H]^+$  and 1093.7853  $[2M+H]^+$ .

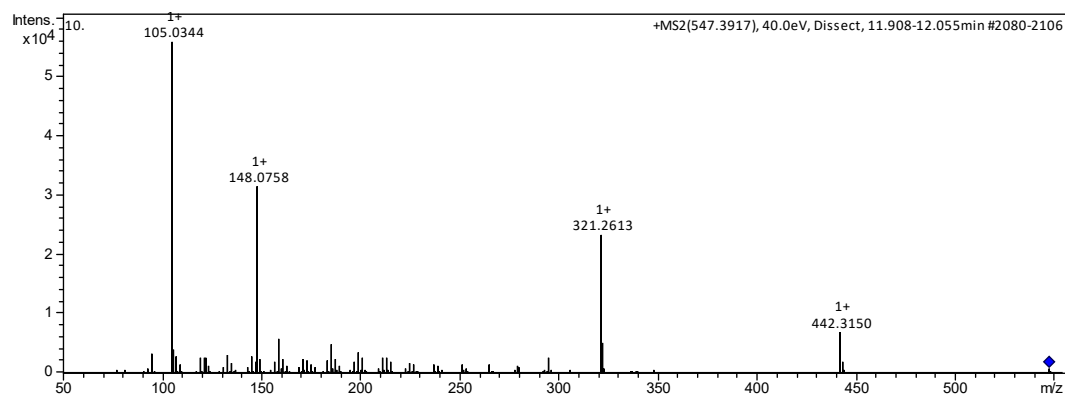

**Figure S121.** +ESI-QqTOF MS/MS spectrum of N-benzoyl-O-acetylbuxadine-E (23).

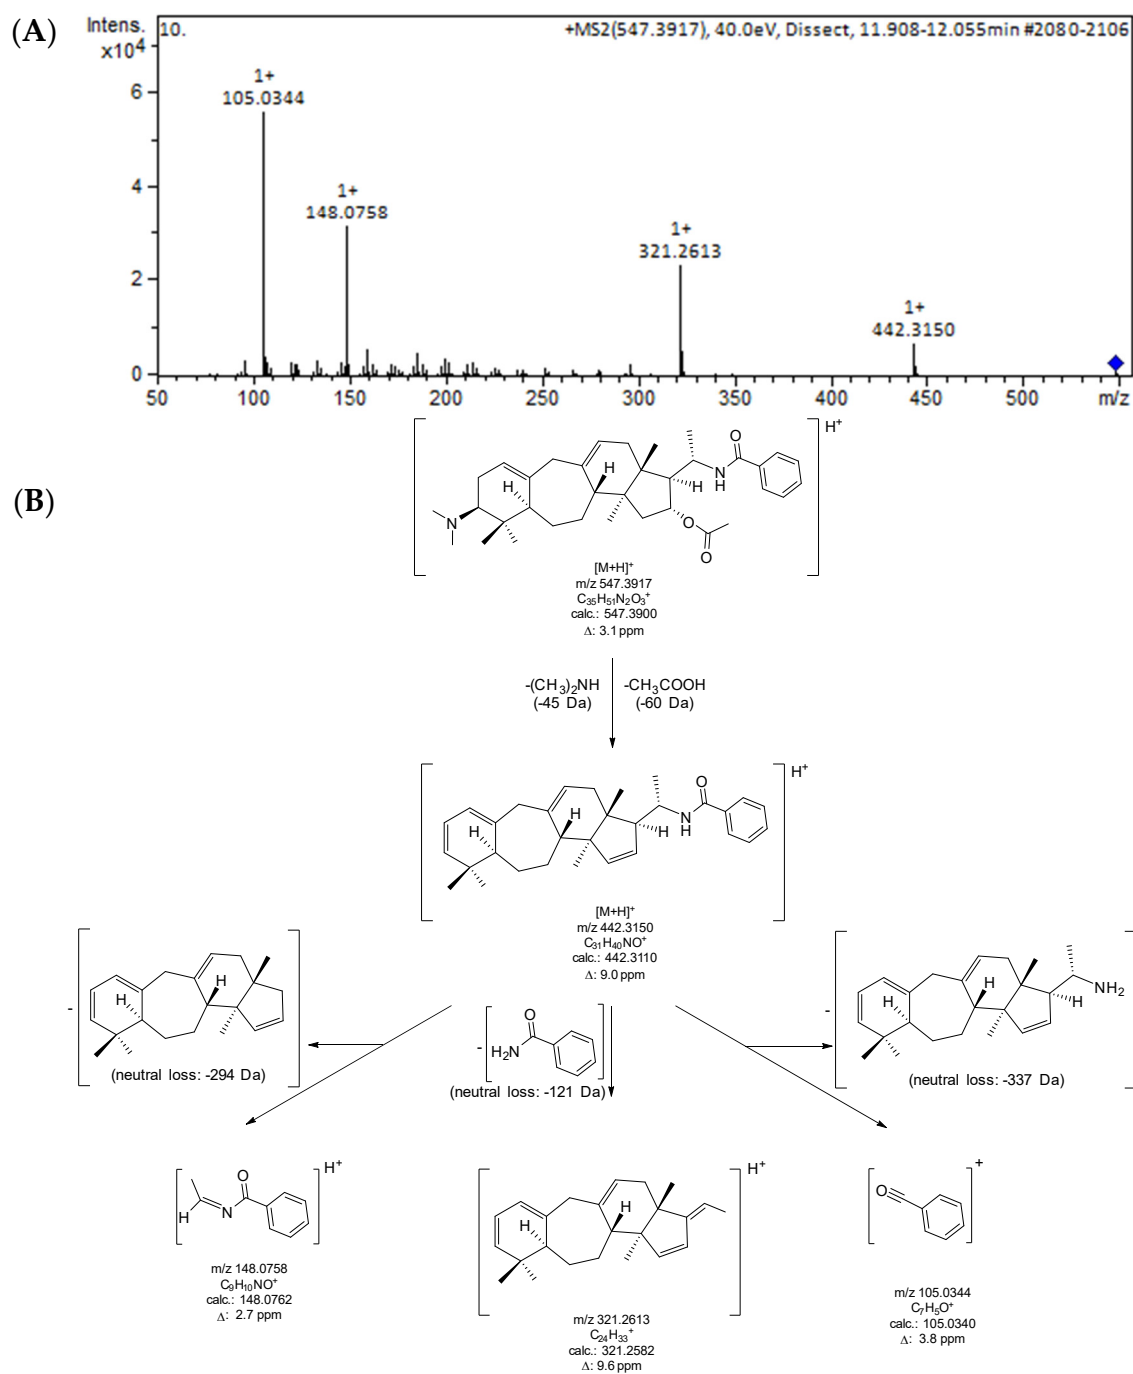

**Figure S122.** (A) +ESI MS/MS spectrum (CID 40 eV). (B) fragments and possible fragmentation pathway of the  $[M+H]^+$  ion of N-benzoyl-O-acetylbuxadine-E (23).



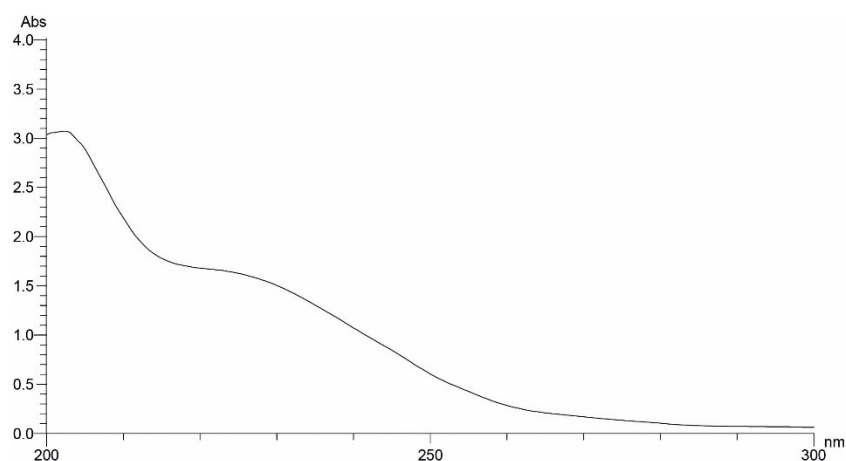

**Figure S123.** UV spectrum of N-benzoyl-O-acetylbuxadine-E (**23**) ( $c = 0.086$  mg/mL) in methanol;  $\lambda_{\max}$  ( $\log \epsilon$ ): 225 nm (4.01).

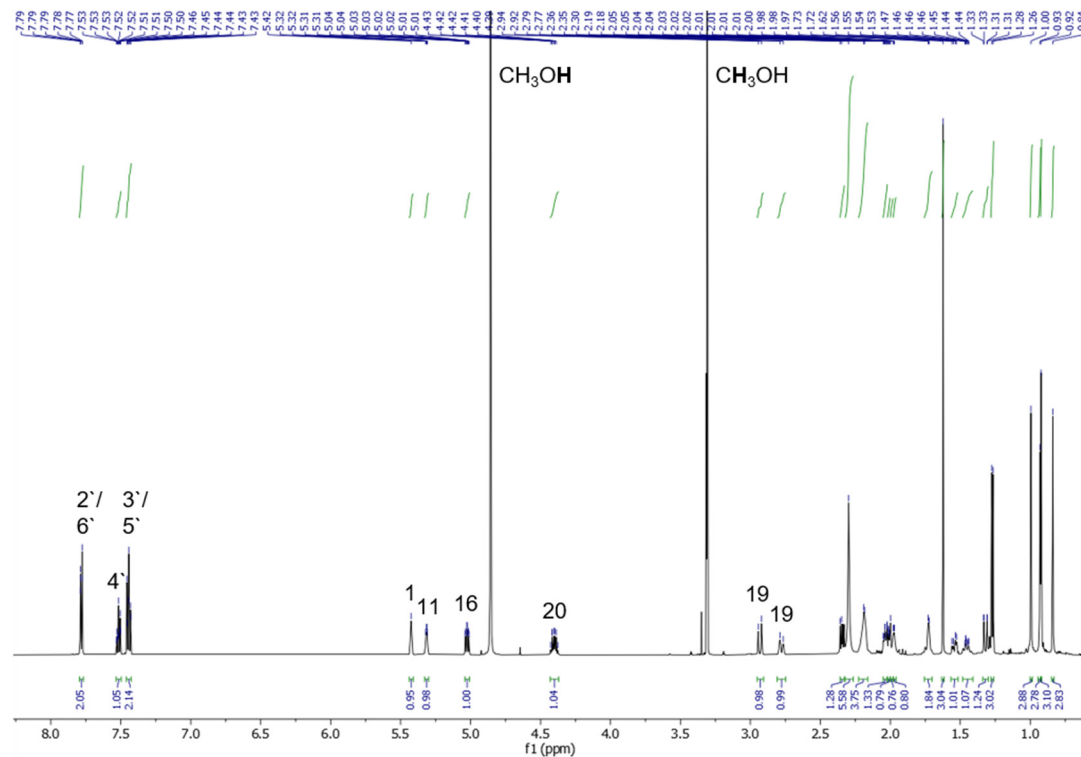

**Figure S124.**  $^1\text{H}$  NMR spectrum of N-benzoyl-O-acetylbuxadine-E (**23**) ( $\text{CD}_3\text{OD}$ , 600 MHz). The assignment of the signals between 0.8 and 2.4 ppm can be found in the enlarged Figure S125.

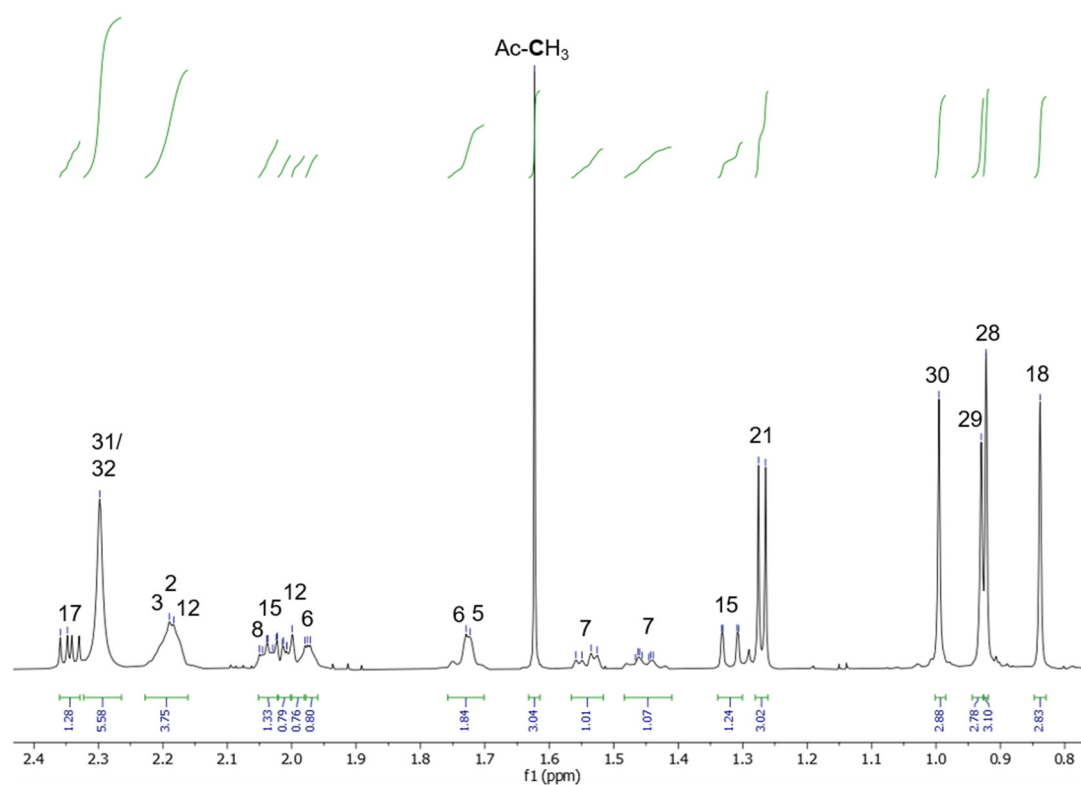

**Figure S125.** Detail of the  $^1\text{H}$  NMR spectrum of N-benzoyl-O-acetylbuxadine-E (23) ( $\text{CD}_3\text{OD}$ , 600 MHz).

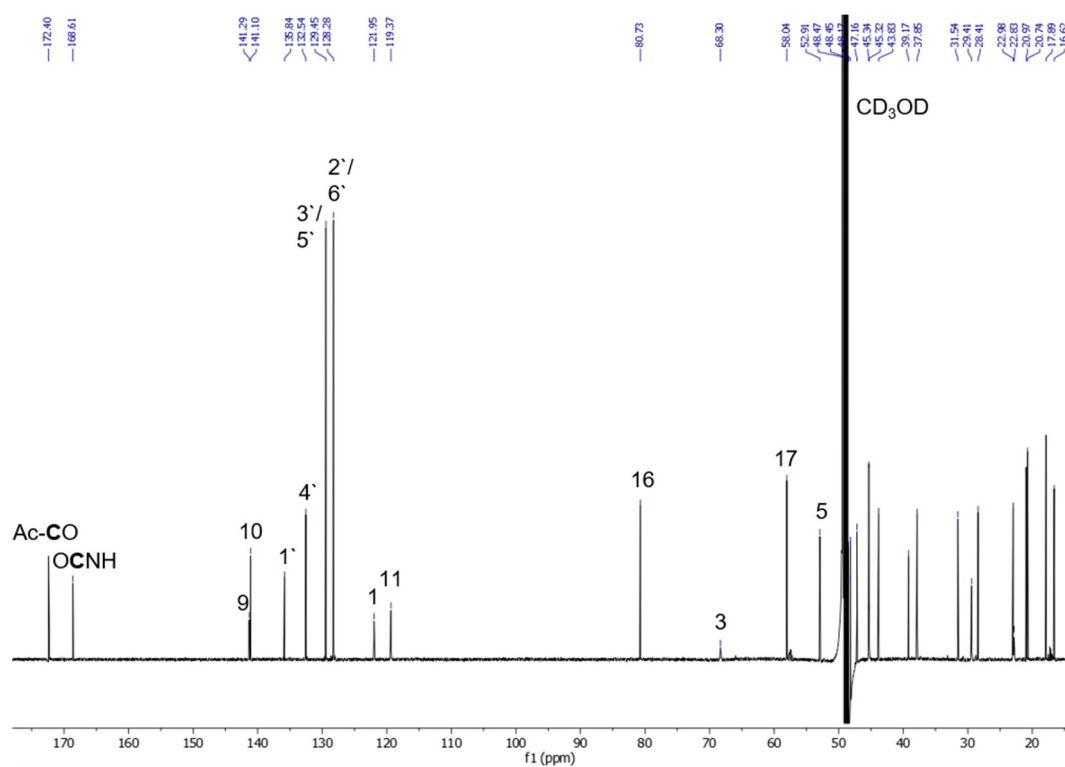

**Figure S126.**  $^{13}\text{C}$  NMR spectrum of N-benzoyl-O-acetylbuxadine-E (23) ( $\text{CD}_3\text{OD}$ , 150 MHz). The assignment of the signals between 16 and 49 ppm can be found in the enlarged Figure S127.

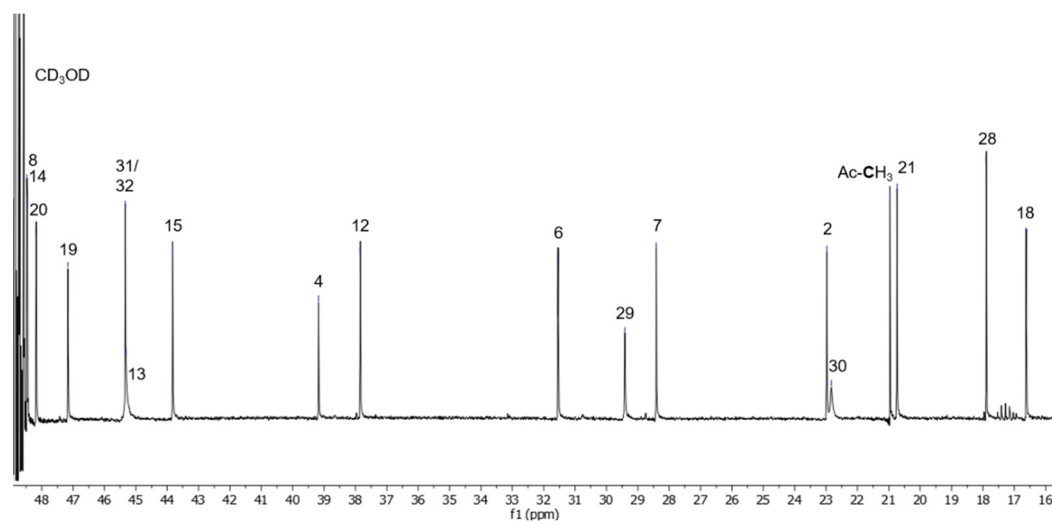

**Figure S127.** Detail of the  $^{13}\text{C}$  NMR spectrum of N-benzoyl-O-acetylbuxadine-E (23) ( $\text{CD}_3\text{OD}$ , 150 MHz).

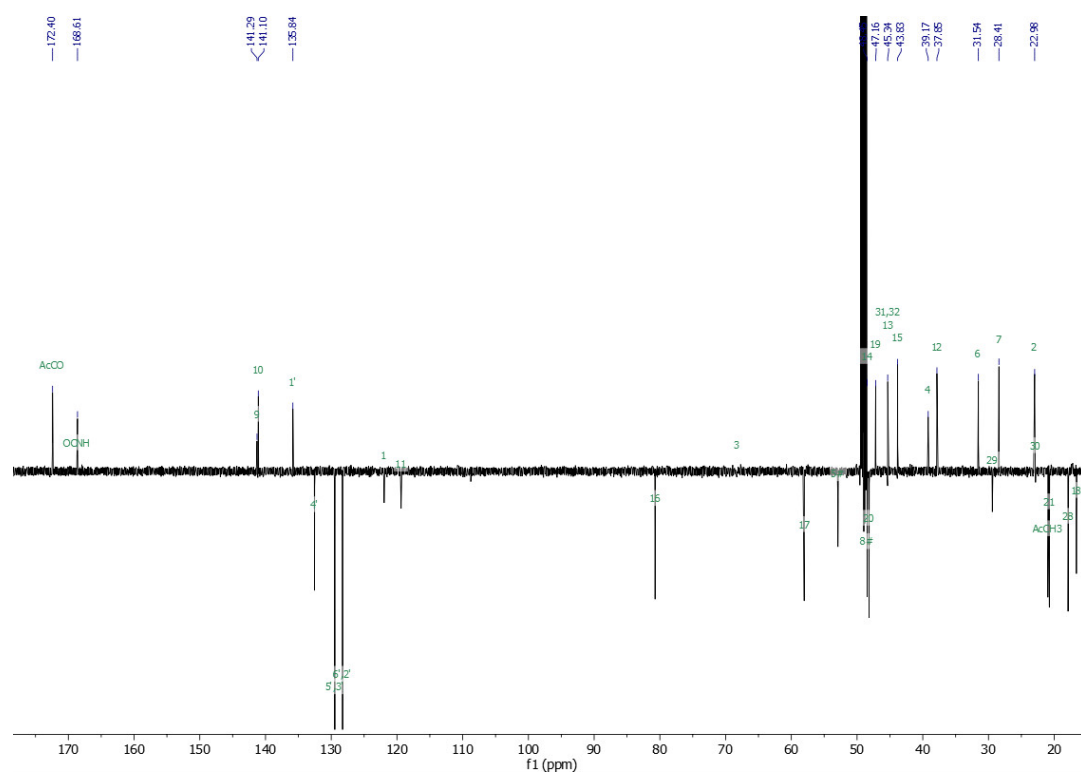

**Figure S128.**  $^{13}\text{C}$  APT spectrum of N-benzoyl-O-acetylbuxadine-E (23) ( $\text{CD}_3\text{OD}$ , 150 MHz).

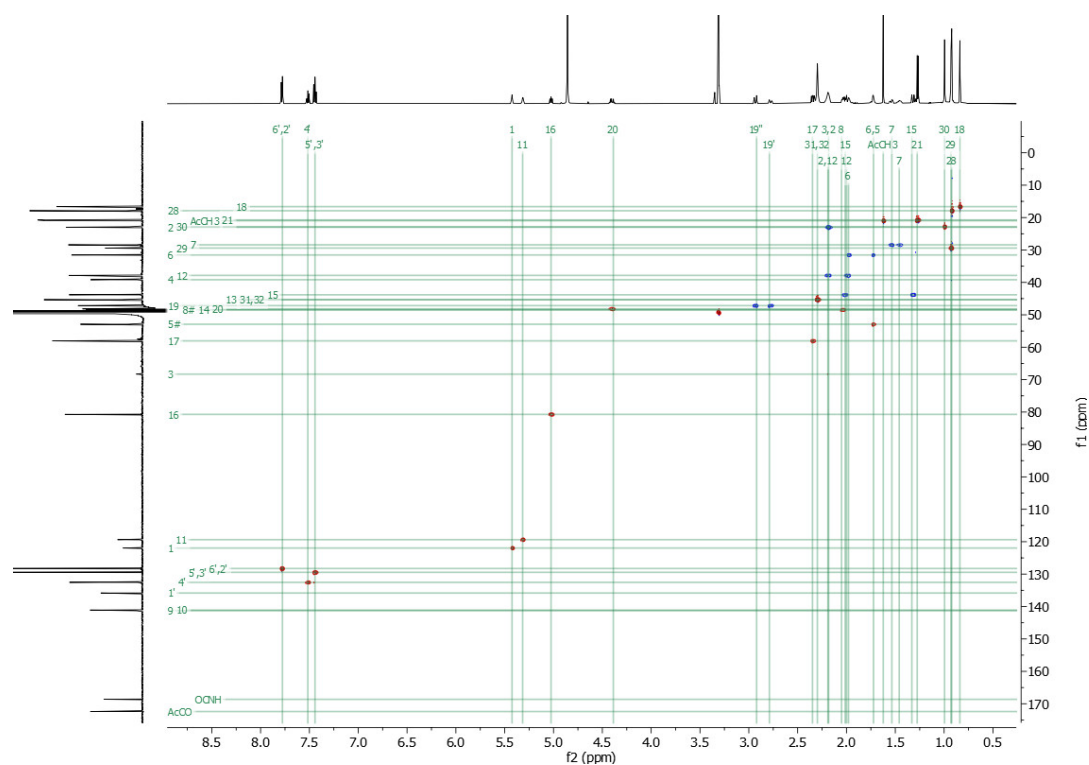

**Figure S129.**  $^1\text{H}/^{13}\text{C}$  HSQC spectrum of N-benzoyl-O-acetylbuxadine-E (**23**) ( $\text{CD}_3\text{OD}$ , 600/150 MHz).

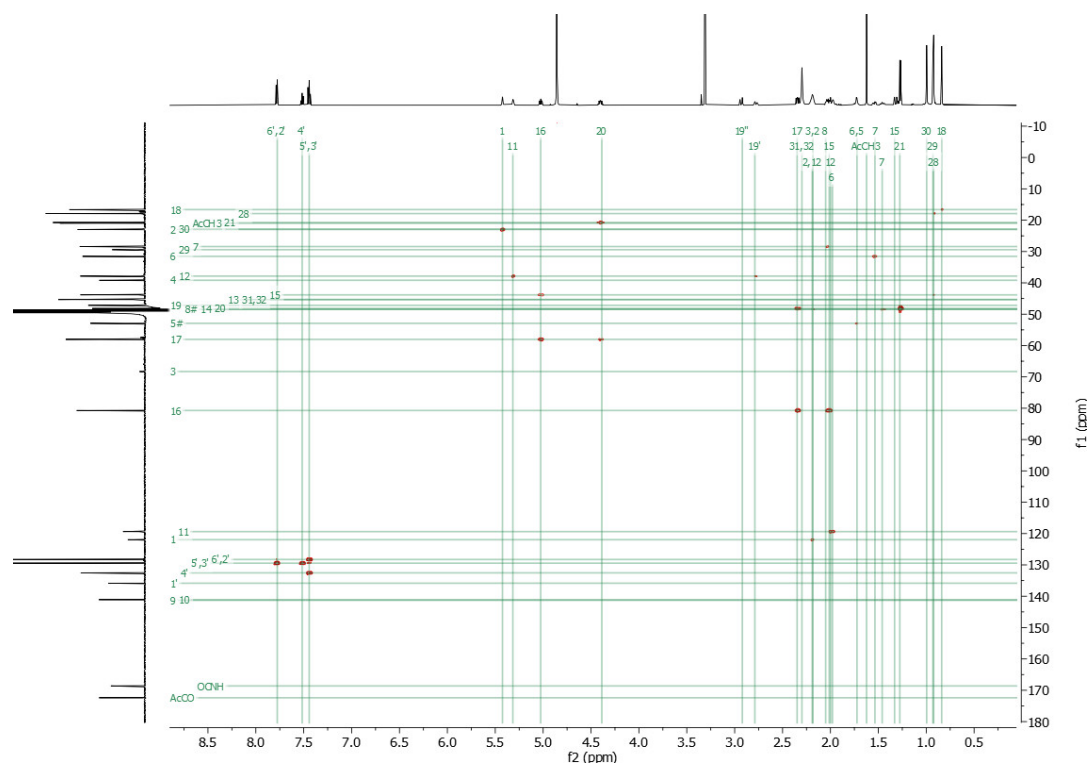

**Figure S130.**  $^1\text{H}/^{13}\text{C}$  H2BC spectrum of N-benzoyl-O-acetylbuxadine-E (**23**) ( $\text{CD}_3\text{OD}$ , 600/150 MHz).

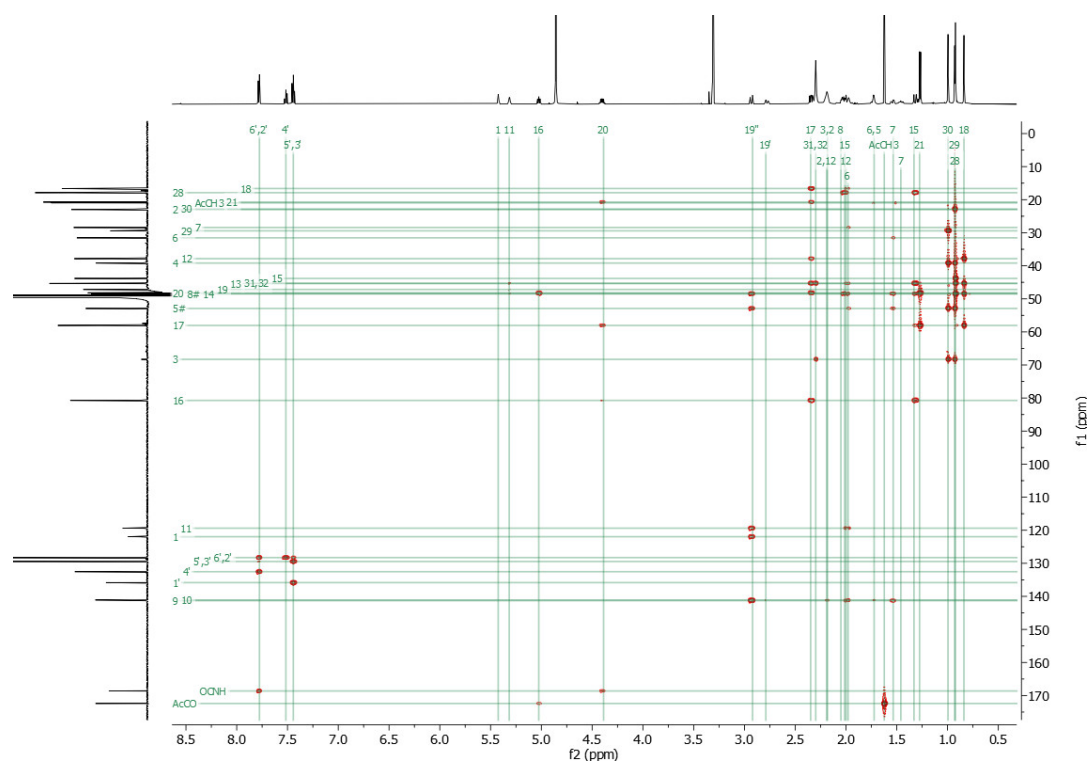

**Figure S131.**  $^1\text{H}/^{13}\text{C}$  HMBC spectrum of N-benzoyl-O-acetylbuxadine-E (**23**) ( $\text{CD}_3\text{OD}$ , 600/150 MHz).

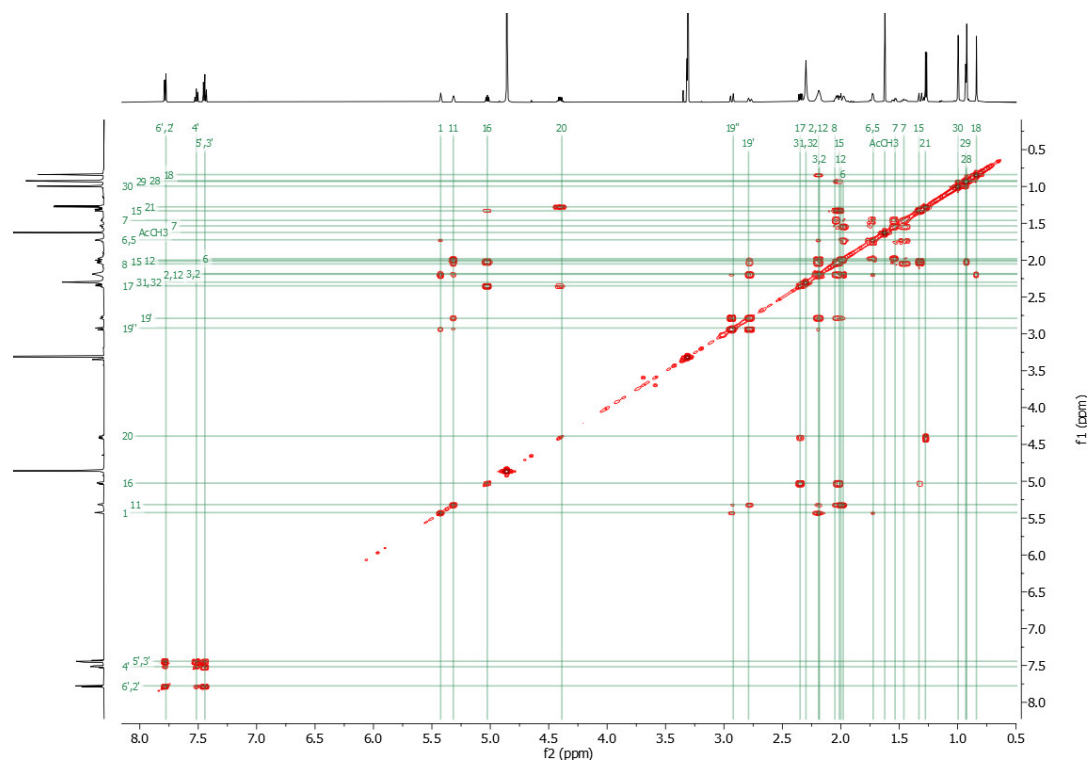

**Figure S132.**  $^1\text{H}/^1\text{H}$  COSY spectrum of N-benzoyl-O-acetylbuxadine-E (**23**) ( $\text{CD}_3\text{OD}$ , 600 MHz).

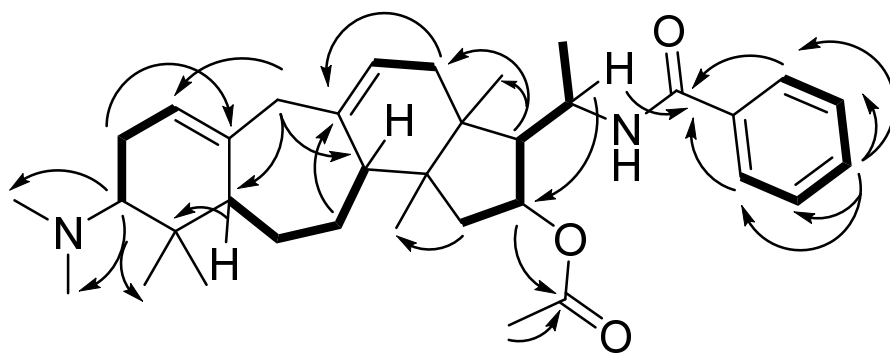

**Figure S133.** Key COSY (bold lines) and HMBC (arrows) correlations of N-benzoyl-O-acetylbuxadine-E (23).

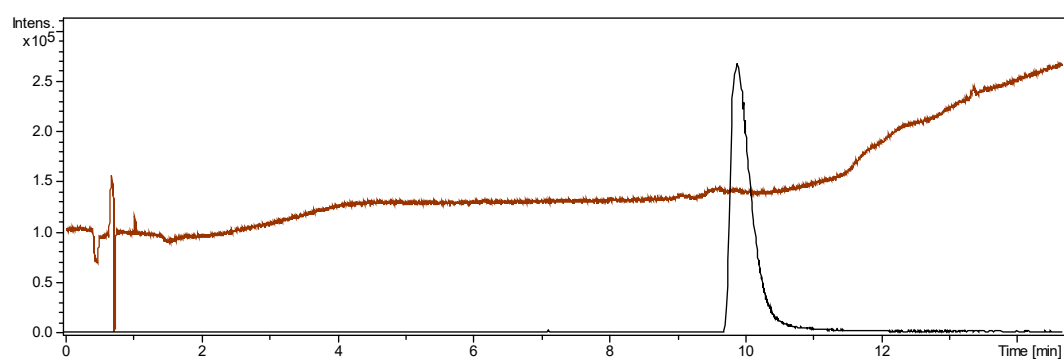

**Figure S134.** UHPLC/ESI-QqTOF-MS/MS chromatogram of N<sub>20</sub>-acetylbuxadine-G (24). Base peak chromatogram 200.0000-1000.0000 +All MS (black); UV-Chromatogram, 200-400 nm (red).

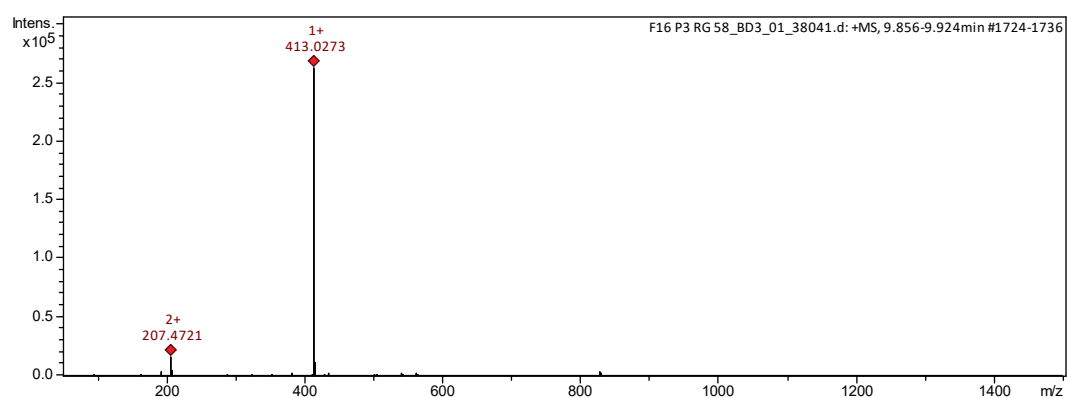

**Figure S135.** +ESI-QqTOF MS spectrum of N<sub>20</sub>-acetylbuxadine-G (24); m/z 207.4721 [M+2H]<sup>2+</sup> and 413.0273 [M+H]<sup>+</sup>.

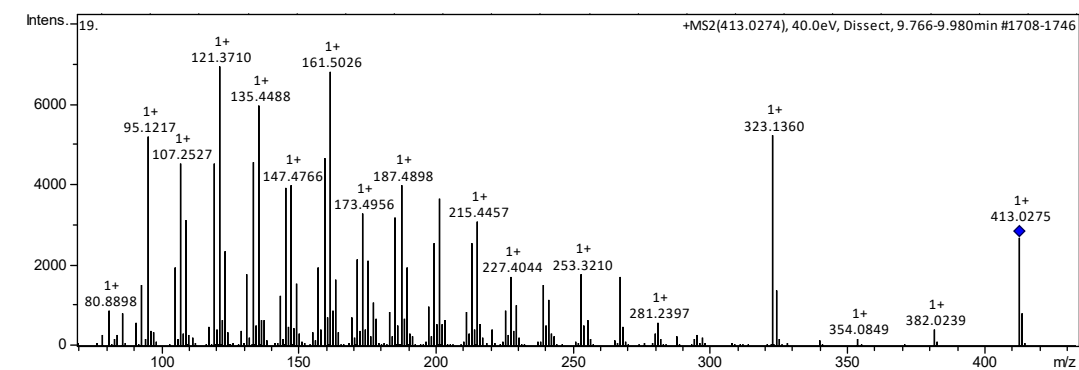

**Figure S136.** +ESI-QqTOF MS/MS spectrum of N<sub>20</sub>-acetylbuxadine-G (24).

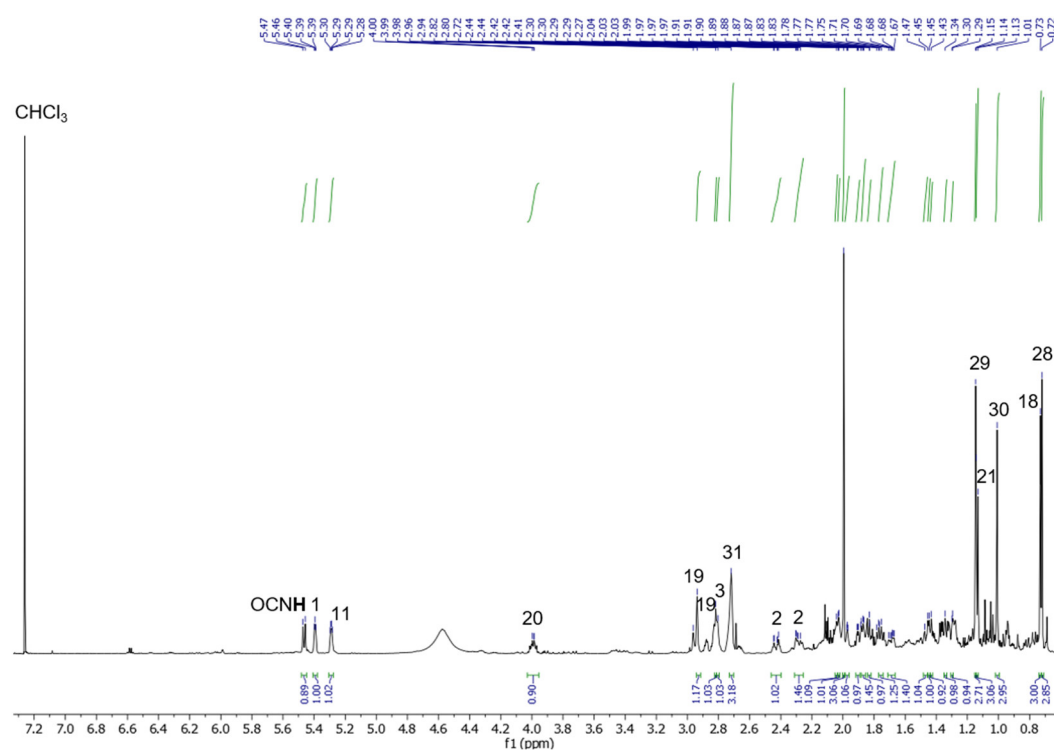

**Figure S137.** <sup>1</sup>H NMR spectrum of N<sub>20</sub>-acetylbuxadine-G (24) (CDCl<sub>3</sub>, 600 MHz). The assignment of the signals between 1.25 and 2.05 ppm can be found in the enlarged Figure S138.

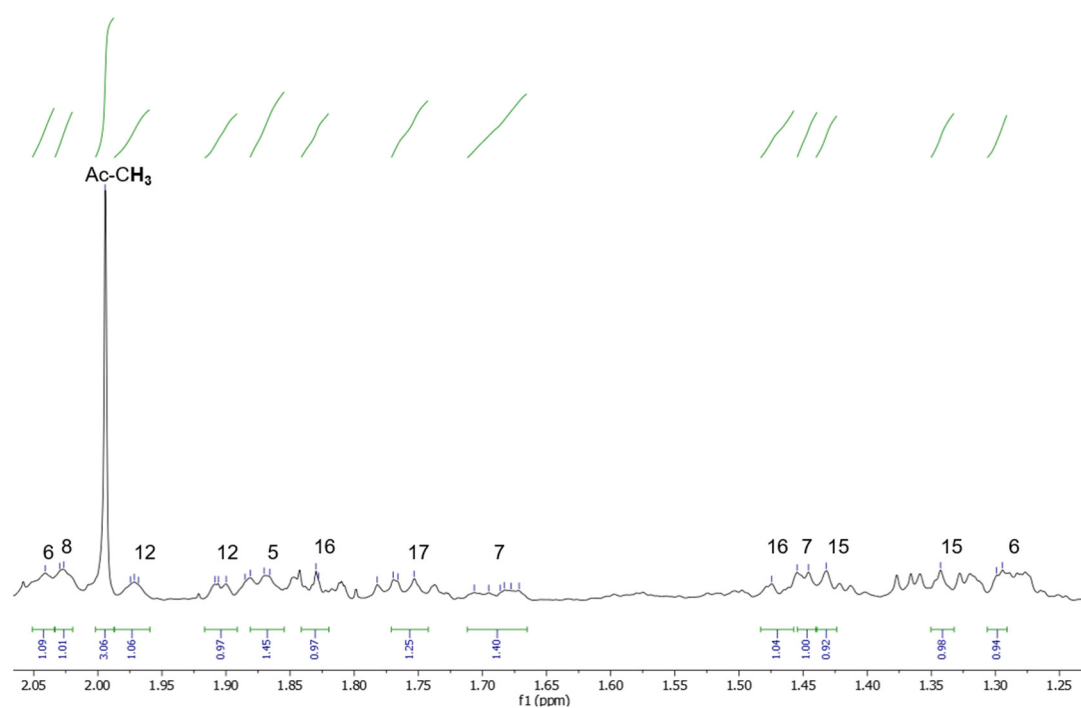

**Figure S138.** Detail of the  $^1\text{H}$  NMR spectrum of  $\text{N}_{20}$ -acetylbuxadine-G (**24**) ( $\text{CDCl}_3$ , 600 MHz).

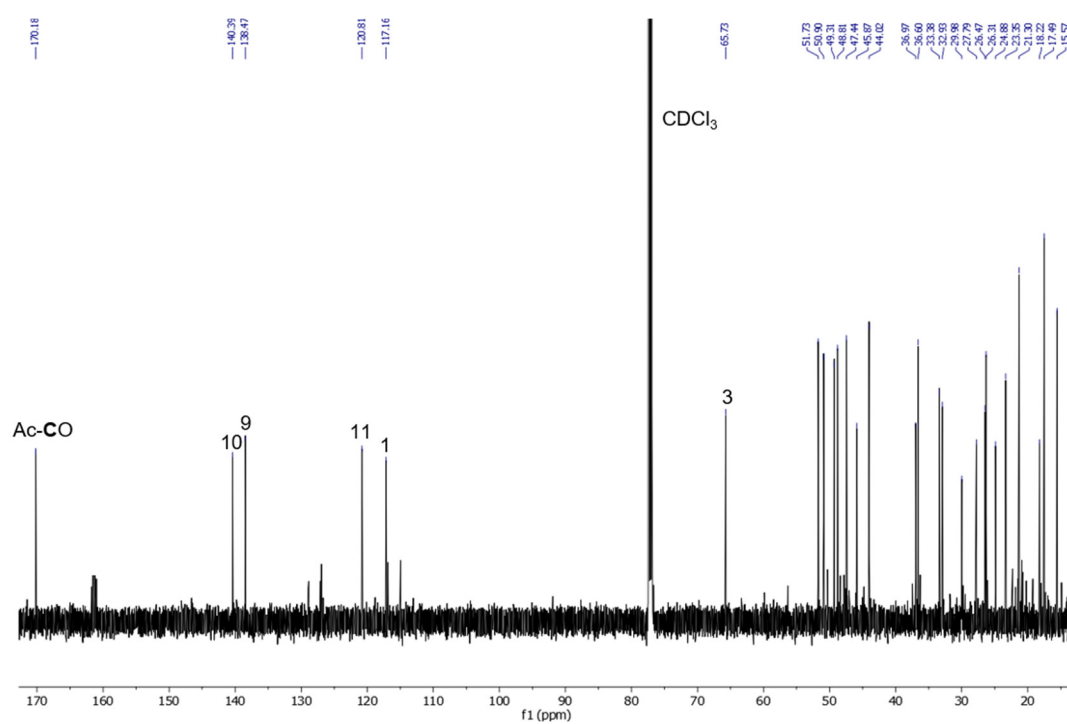

**Figure S139.**  $^{13}\text{C}$  NMR spectrum of  $\text{N}_{20}$ -acetylbuxadine-G (**24**) ( $\text{CDCl}_3$ , 150 MHz). The assignment of the signals between 15 and 52 ppm can be found in the enlarged Figure S140.



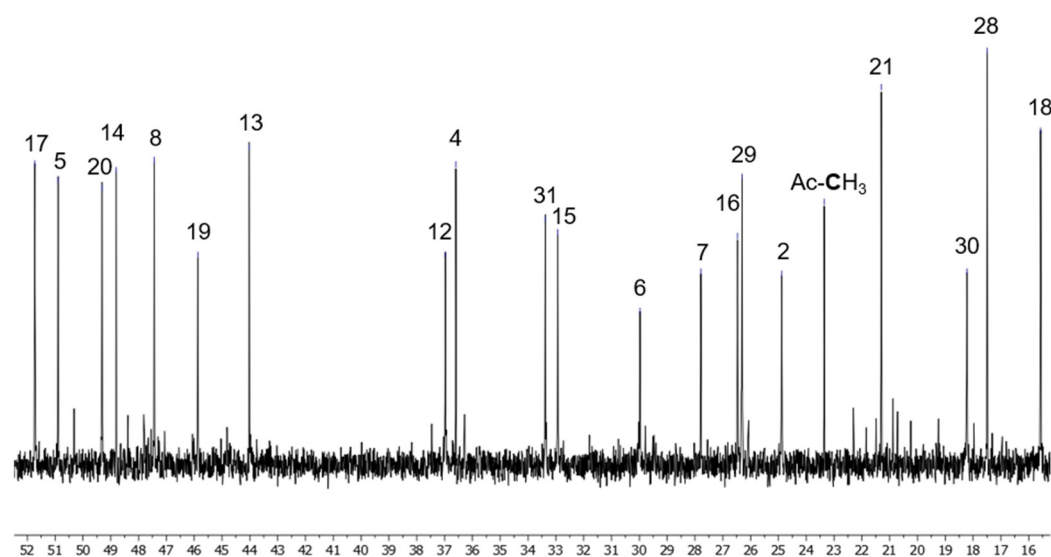

Figure S140. Detail of the  $^{13}\text{C}$  NMR spectrum of  $\text{N}_{20}$ -acetylbuxadine-G (**24**) ( $\text{CDCl}_3$ , 150 MHz).

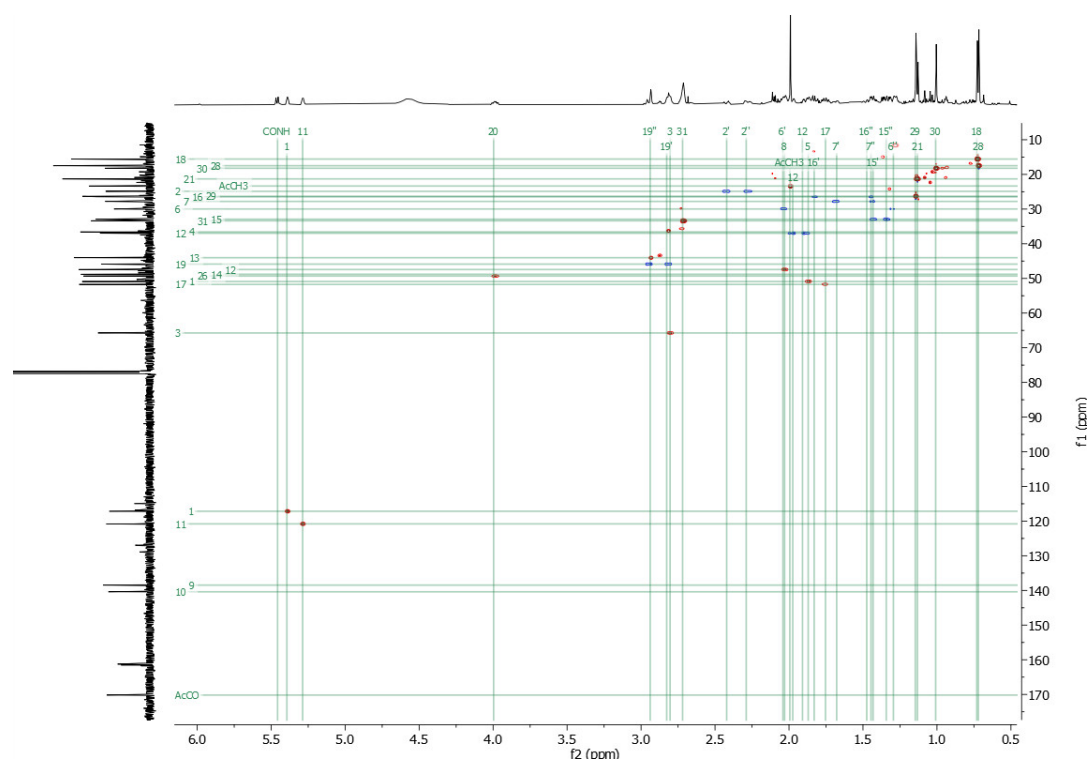

Figure S141.  $^1\text{H}/^{13}\text{C}$  HSQC spectrum of  $\text{N}_{20}$ -acetylbuxadine-G (**24**) ( $\text{CDCl}_3$ , 600/150 MHz).

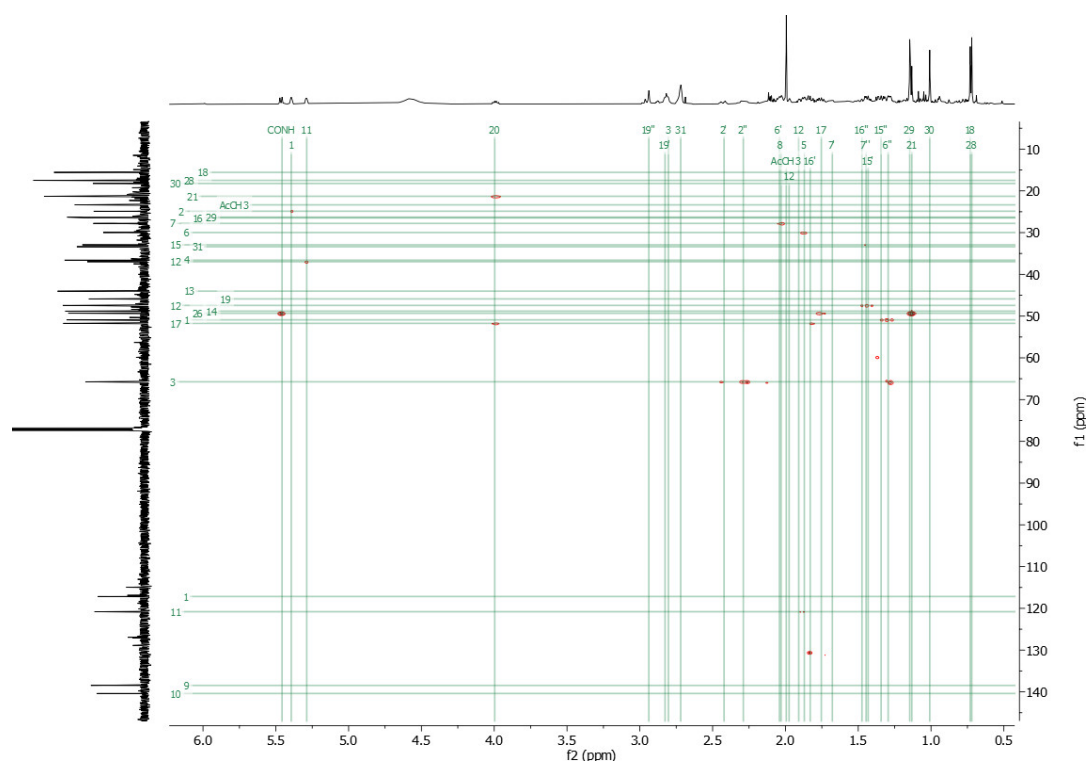

Figure S142.  $^1\text{H}/^{13}\text{C}$  H2BC spectrum of  $N_{20}$ -acetylbuxadine-G (**24**) ( $\text{CDCl}_3$ , 600/150 MHz).

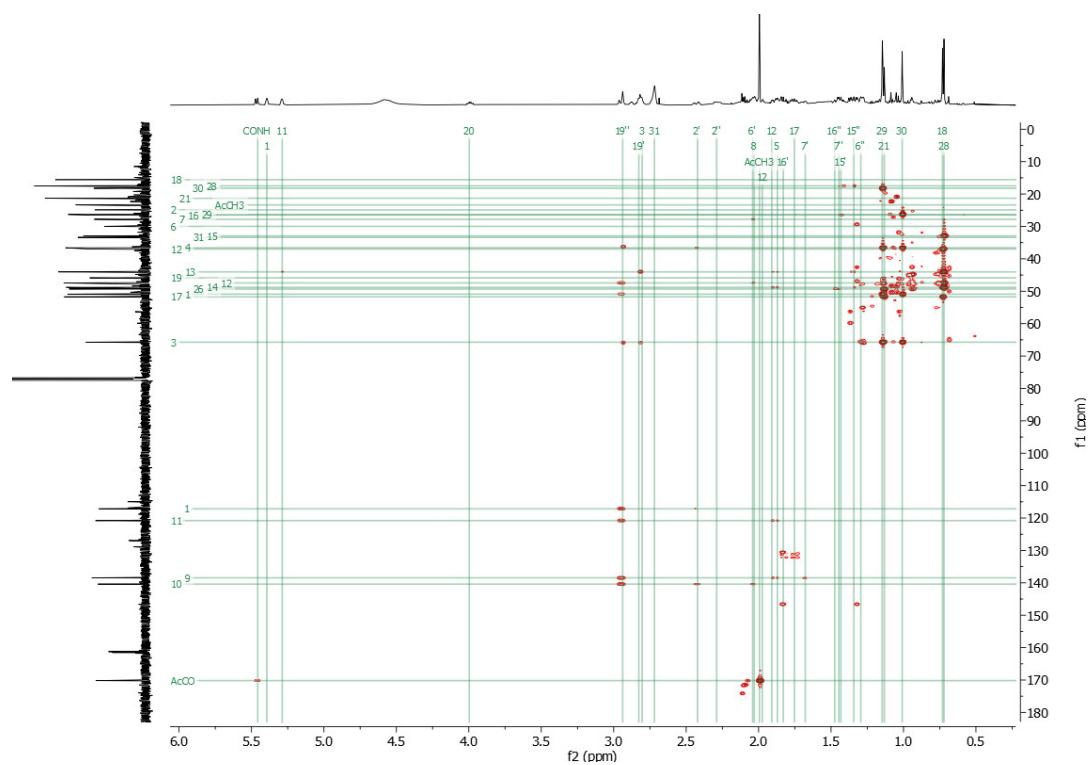

Figure S143.  $^1\text{H}/^{13}\text{C}$  HMBC spectrum of  $N_{20}$ -acetylbuxadine-G (**24**) ( $\text{CDCl}_3$ , 600/150 MHz).

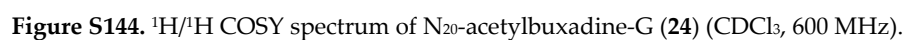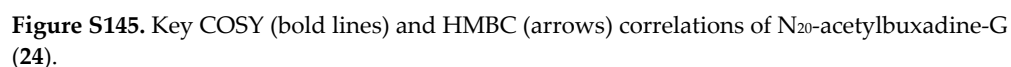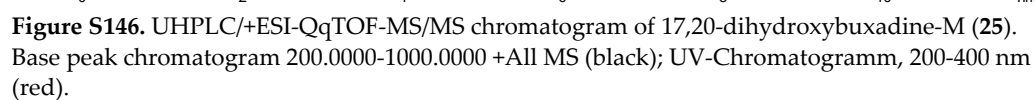

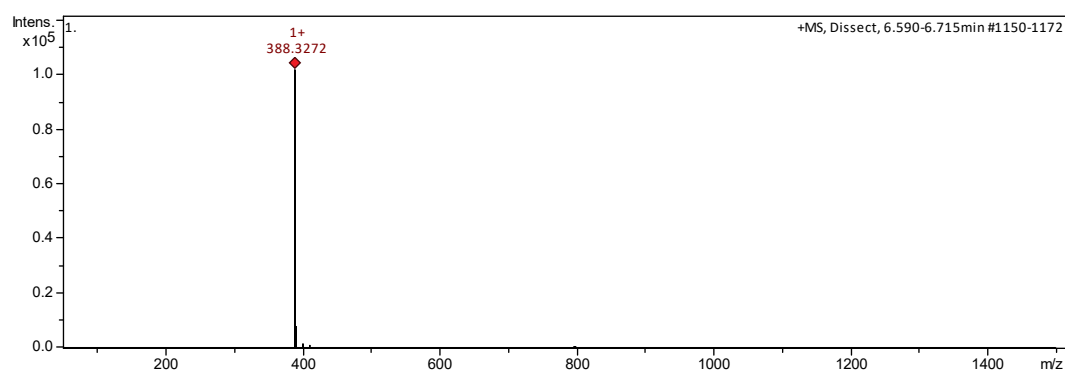

Figure S147. +ESI-QqTOF MS spectrum of 17,20-dihydroxybuxadine-M (25);  $m/z$  388.3272  $[M+H]^+$ .

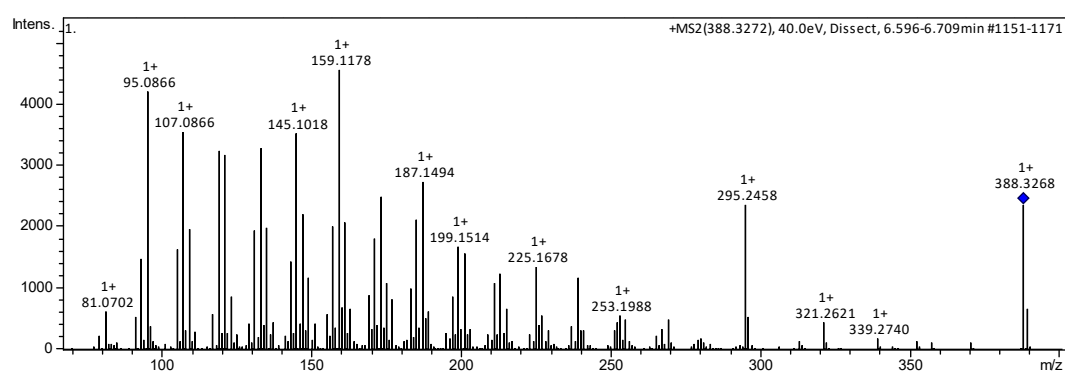

Figure S148. +ESI-QqTOF MS/MS spectrum of 17,20-dihydroxybuxadine-M (25).

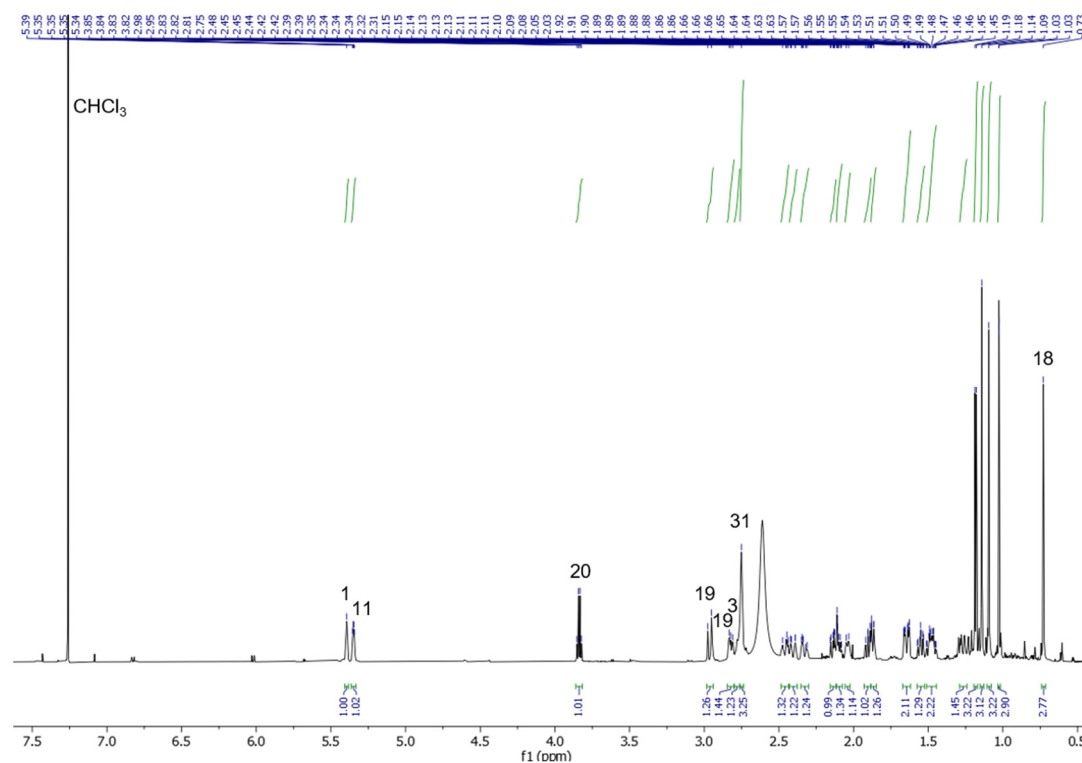

Figure S149.  $^1\text{H}$  NMR spectrum of 17,20-dihydroxybuxadine-M (25) ( $\text{CDCl}_3$ , 600 MHz). The assignment of the signals between 1.0 and 2.5 ppm can be found in the enlarged Figure S150.

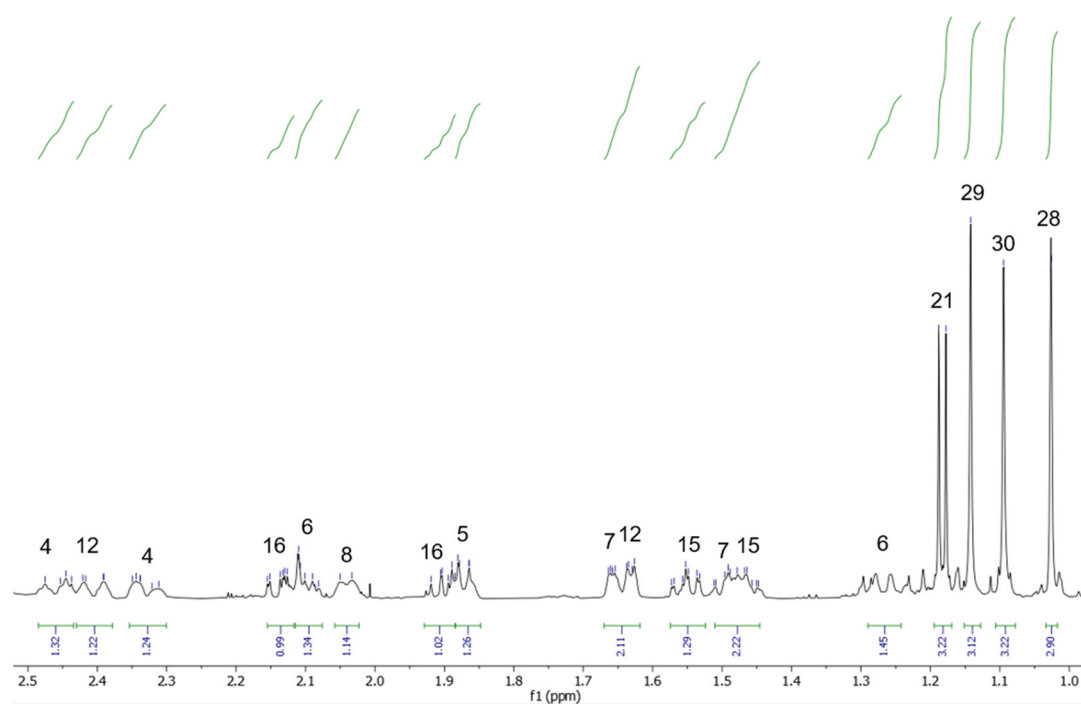

**Figure S150.** Detail of the  $^1\text{H}$  NMR spectrum of 17,20-dihydroxybuxadine-M (**25**) ( $\text{CDCl}_3$ , 600 MHz).

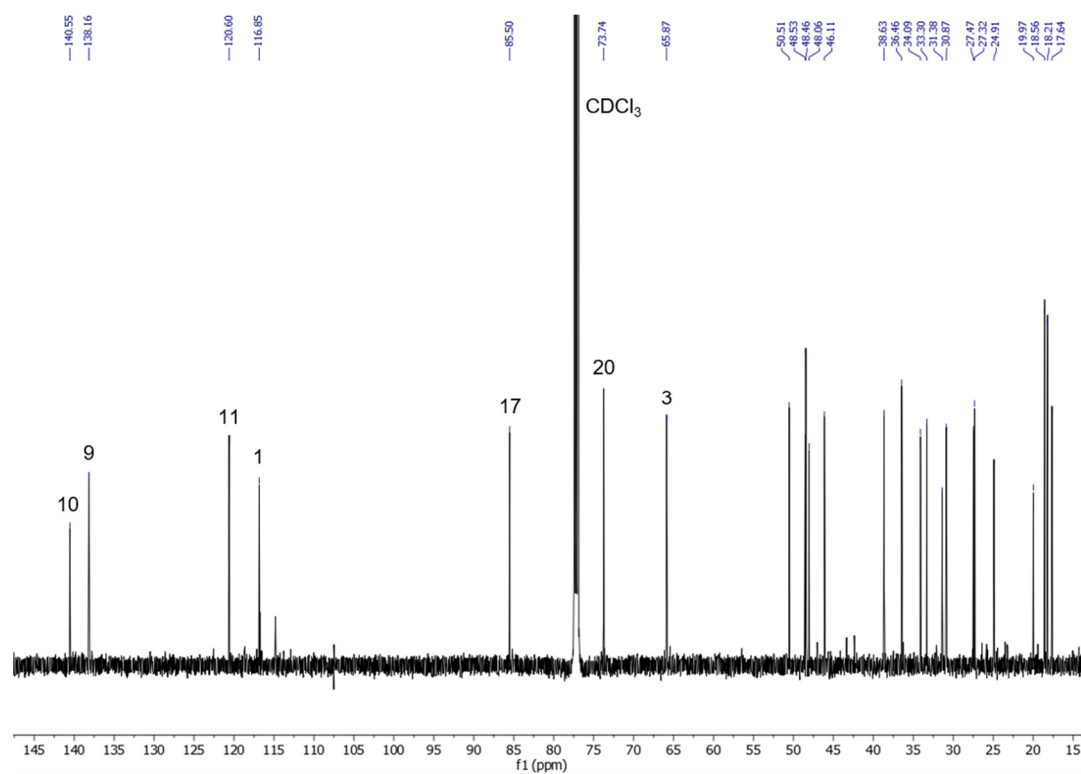

**Figure S151.**  $^{13}\text{C}$  NMR spectrum of 17,20-dihydroxybuxadine-M (**25**) ( $\text{CDCl}_3$ , 150 MHz). The assignment of the signals between 17 and 51 ppm can be found in the enlarged Figure S152.

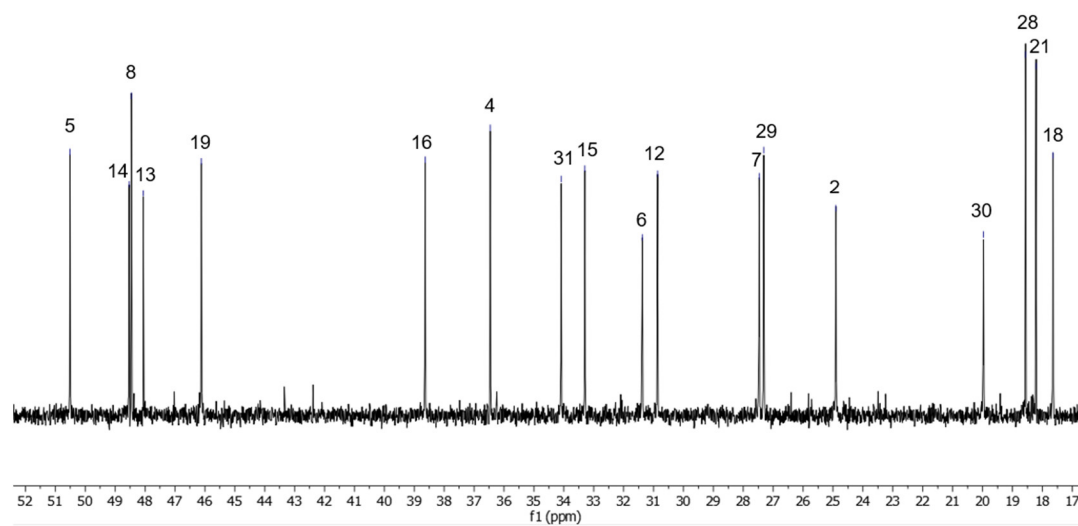

**Figure S152.** Detail of the <sup>13</sup>C NMR spectrum of 17,20-dihydroxybuxadine-M (25) (CDCl<sub>3</sub>, 150 MHz).

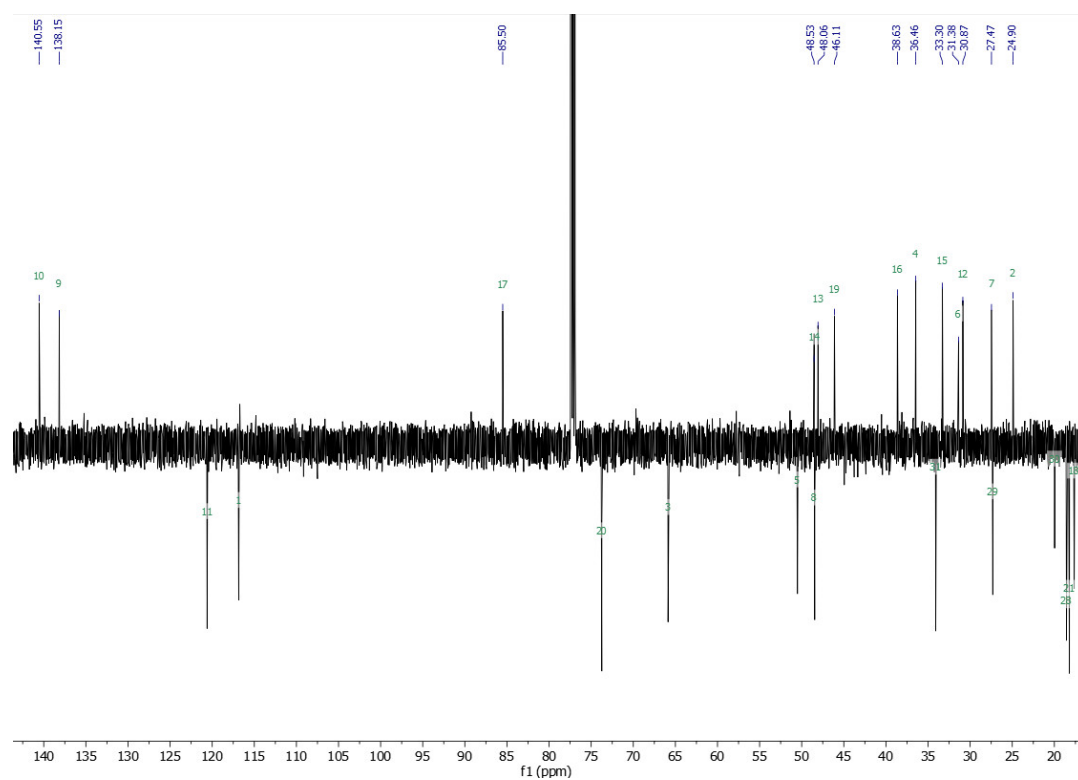

**Figure S153.** <sup>13</sup>C APT spectrum of 17,20-dihydroxybuxadine-M (25) (CDCl<sub>3</sub>, 150 MHz).

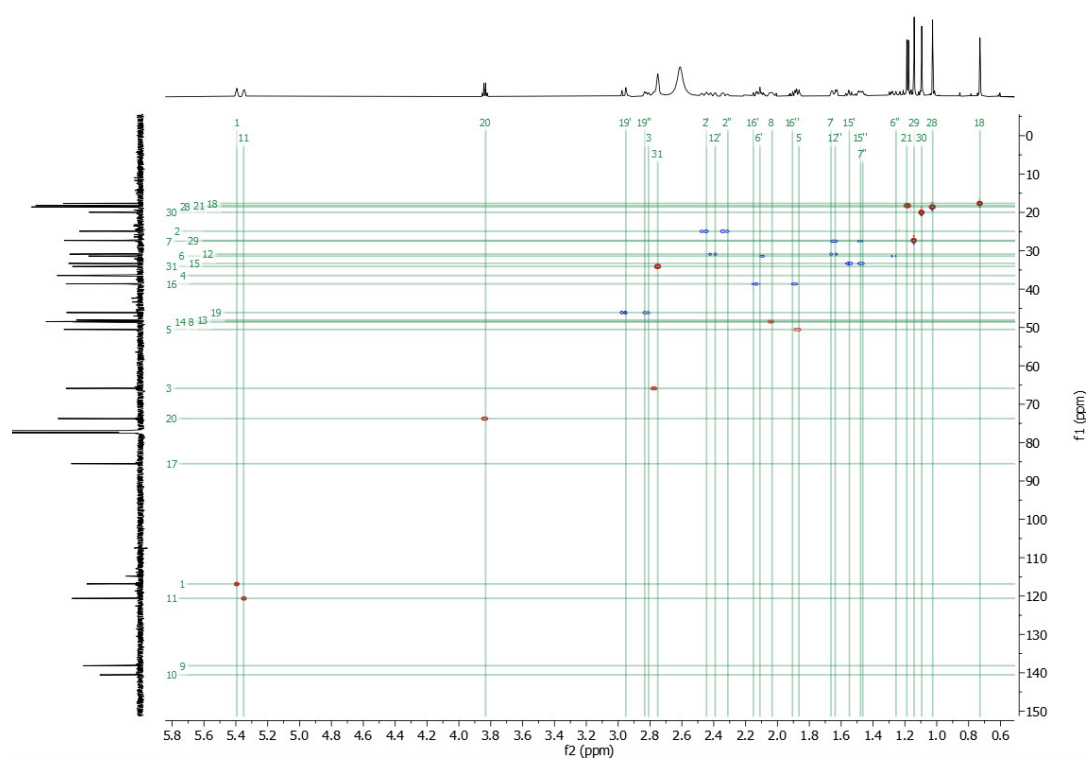

Figure S154.  $^1\text{H}/^{13}\text{C}$  HSQC spectrum of 17,20-dihydroxybuxadine-M (25) ( $\text{CDCl}_3$ , 600/150 MHz).

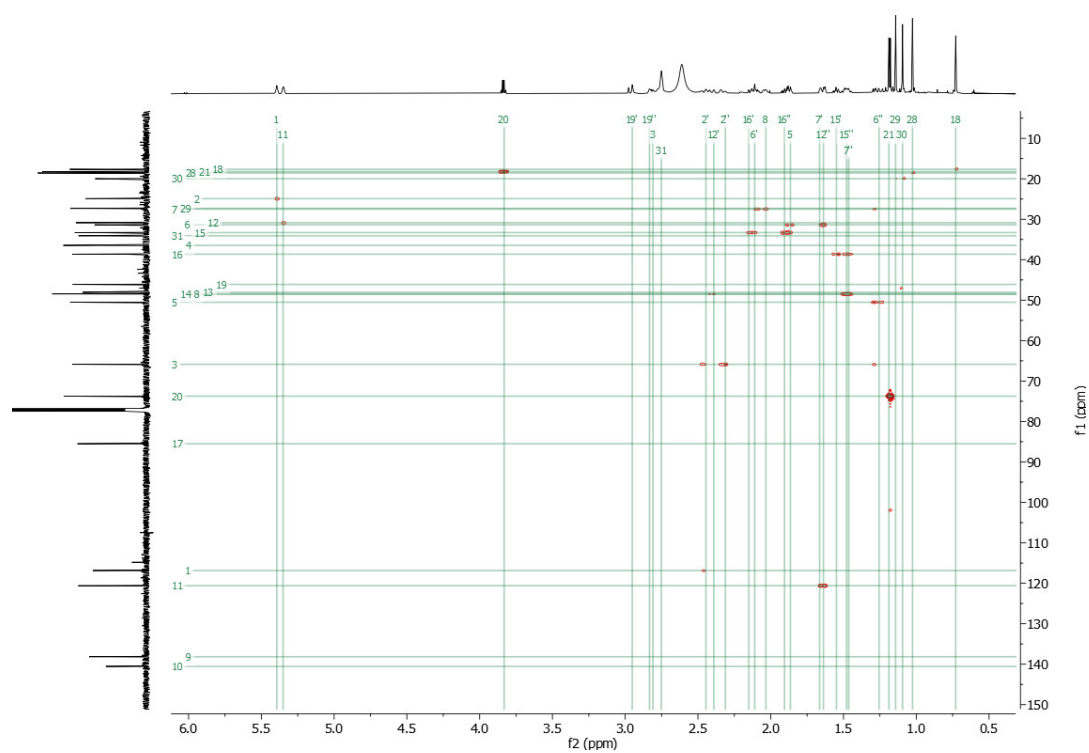

Figure S155.  $^1\text{H}/^{13}\text{C}$  H2BC spectrum of 17,20-dihydroxybuxadine-M (25) ( $\text{CDCl}_3$ , 600/150 MHz).

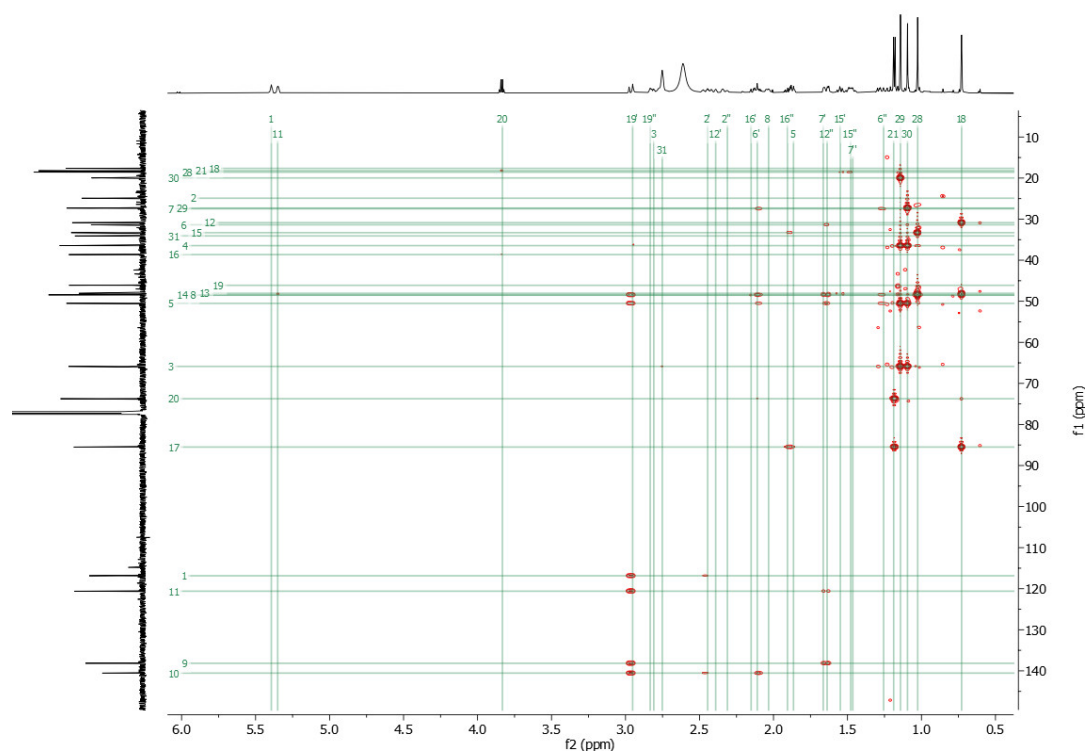

Figure S156.  $^1\text{H}/^{13}\text{C}$  HMBC spectrum of 17,20-dihydroxybuxadine-M (25) ( $\text{CDCl}_3$ , 600/150 MHz).

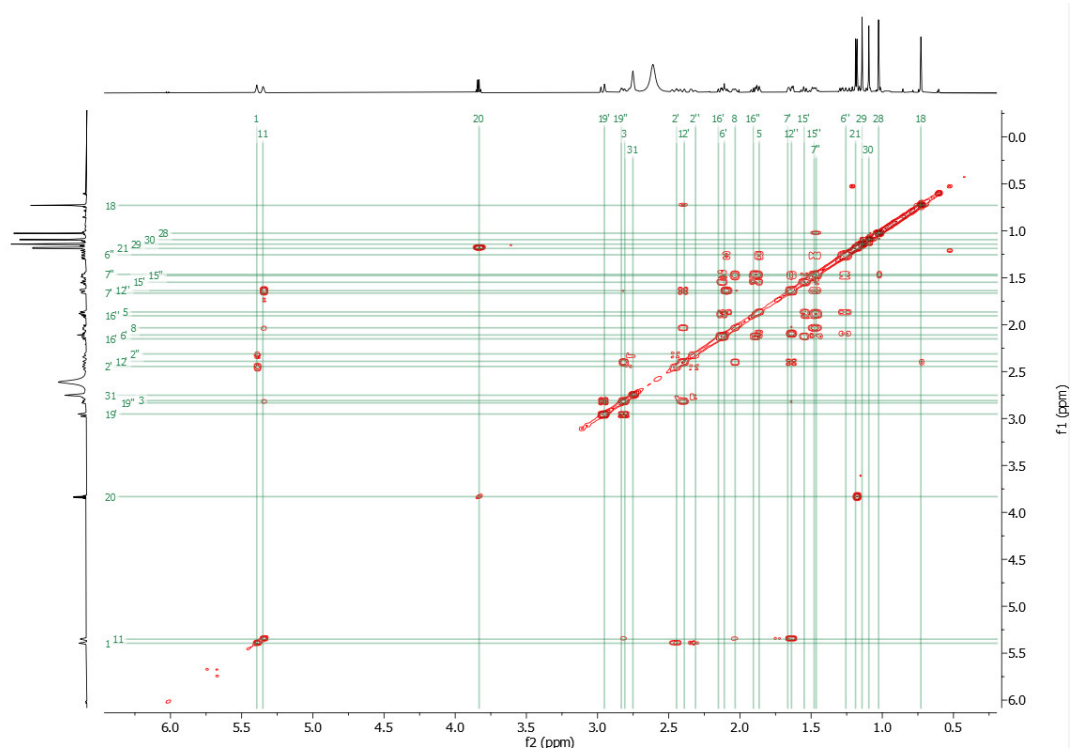

Figure S157.  $^1\text{H}/^1\text{H}$  COSY spectrum of 17,20-dihydroxybuxadine-M (25) ( $\text{CDCl}_3$ , 600 MHz).



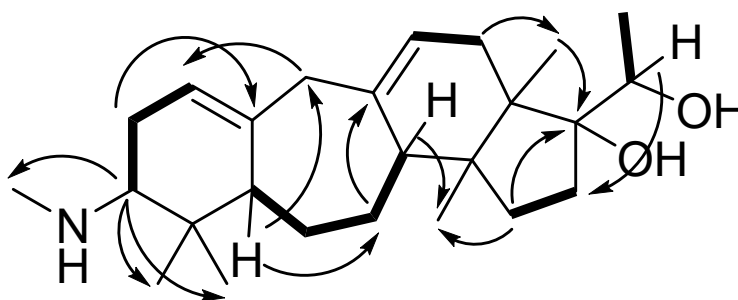

**Figure S158.** Key COSY (bold lines) and HMBC (arrows) correlations of 17,20-dihydroxybuxadine-M (25).
